# Supplementary material for: Ionic radius-dependent self-assembly of lanthanide organic polyhedra: structural diversities and luminescent properties
Source: Royal Society of Chemistry journal article supplement (doi:10.1039/d5qi00265f), 2025-01-01
Supplement: d5qi00265f1.pdf [file d5qi00265f1.pdf]

## Supporting Information

### **Ionic Radius-Dependent Self-Assembly of Lanthanide Organic Polyhedra: Structural Diversities and Luminescent Properties**

Jing Su<sup>a,b,c</sup>, Fan Yin<sup>a</sup>, Xiao-Fang Duan<sup>a</sup>, Jing-Yao Zhou<sup>a</sup>, Li-Peng Zhou<sup>a</sup>, Chong-Bin Tian<sup>\*a,b,c</sup> and Qing-Fu Sun<sup>\*a,b,c</sup>

a. State Key Laboratory of Structural Chemistry, Fujian Institute of Research on the Structure of Matter, Chinese Academy of Sciences, Fuzhou 350002, P. R. China

b. College of Chemistry and Materials Science, Fujian Normal University, Fuzhou, 350007, China

c. Fujian College, University of Chinese Academy of Sciences, Fuzhou, Fujian, 350002, P. R. China

\* Correspondence to: [tianchongbin@fjirsm.ac.cn](mailto:tianchongbin@fjirsm.ac.cn); [qfsun@fjirsm.ac.cn](mailto:qfsun@fjirsm.ac.cn)

## Contents

|                                                        |     |
|--------------------------------------------------------|-----|
| 1. General information .....                           | S3  |
| 2. Synthesis and characterization .....                | S4  |
| 2.1 Synthesis and characterization of ligand .....     | S4  |
| 2.2 Synthesis and characterization of cages .....      | S8  |
| 2.3 ESI-TOF-MS spectra .....                           | S22 |
| 3. Single crystal X-ray diffraction studies .....      | S33 |
| 3.1 Crystal studies .....                              | S33 |
| 3.2 Volume calculations .....                          | S40 |
| 4. Host-guest studies .....                            | S42 |
| 4.1 General procedure for host-guest studies .....     | S42 |
| 4.2 Binding constants estimation .....                 | S42 |
| 5. The rich conformations of the ligand <b>L</b> ..... | S44 |
| 6. UV-Vis and FL spectra .....                         | S45 |
| 7. Reference .....                                     | S51 |

## 1. General information

All chemicals and solvents were purchased from commercial companies and used without further purification unless otherwise stated. Anhydrous solvents were distilled according to standard procedures. Deuterated solvents were purchased from Admas, J&K scientific and Sigma-Aldrich. The 1D and 2D-NMR spectra were measured on Bruker Biospin Avance III (400 MHz) instrument,  $^1\text{H}$ -NMR and  $^{13}\text{C}$  NMR chemical shifts were referenced to the residual signals of the deuterated solvents used ( $\text{CDCl}_3$ ,  $^1\text{H}$  NMR:  $\delta = 7.26$  ppm,  $^{13}\text{C}$  NMR:  $\delta = 77.0$  ppm;  $\text{CD}_3\text{CN}$ ,  $^1\text{H}$  NMR:  $\delta = 1.94$  ppm,  $^{13}\text{C}$  NMR:  $\delta = 118.26$  ppm). ESI-TOF-MS spectra of  $\text{Eu}_8\text{L}_4$ ,  $\text{Sm}_6\text{L}_3$ ,  $\text{Eu}_6\text{L}_3$  and  $\text{Lu}_6\text{L}_3$  was recorded on Impact II UHR-TOF mass spectrometry from Bruker, while ESI-TOF-MS spectra of other compounds were recorded on LC-QTOF-MS (G6520B), with tuning mix as the internal standard. Data analysis was conducted with the Bruker Data Analysis software (Version 4.3) and simulations were performed with the Bruker Isotope Pattern software and Thermo Xcalibur Qual Browser software (Thermo Foundation 2.0). UV-vis spectra are recorded on UV-2700 UV-vis spectrophotometer from SHIMADZU Corporation. Excitation and emission spectra were recorded on the FS5 spectrofluorometer from Edinburg Photonics. The overall luminescence quantum yields were measured by using the FS5 Spectrometer from Edinburg Photonics (SC-30 Integrating Sphere).

## 2. Synthesis and characterization

### 2.1 Synthesis and characterization of ligand.

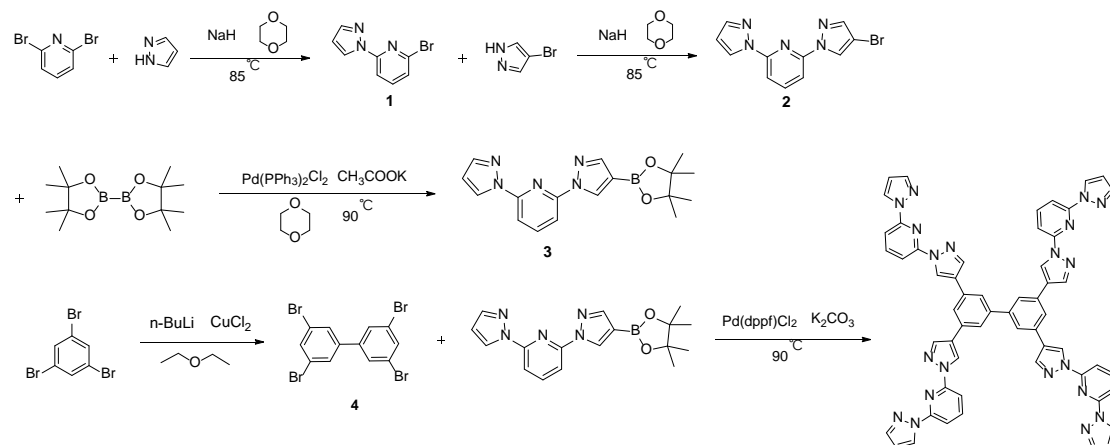

**Scheme S1.** Synthetic route of ligand **L**. The preparation of compound **1** and **2** were followed the literature procedure.<sup>1</sup>

#### Synthesis of 2-(1H-pyrazol-1-yl)-6-(4-(4,4,5,5-tetramethyl-1,3,2-dioxaborolan-2-yl)-1H-pyrazol-1-yl)pyridine (**3**):

Compound **2** (1.16 g, 4 mmol, 2 equiv), 4,4,4',4',5,5,5',5'-octamethyl-2,2'-bi(1,3,2-dioxaborolane) (2.54 g, 10 mmol, 5 equiv), CH<sub>3</sub>COOK (1.96 g, 20 mmol, 10 equiv) and Pd(PPh<sub>3</sub>)<sub>2</sub>Cl<sub>2</sub> (140 mg, 0.2 mmol, 0.1 equiv) were dissolved in the anhydrous dioxane solution (20 mL). The reaction mixture was stirred under 90 °C and N<sub>2</sub> atmosphere for 4 h, and then the crude product was purified by column chromatography (SiO<sub>2</sub>, DCM/PE, v/v = 3/1) to afford compound **3** as white powder (1 g, 75%). <sup>1</sup>H NMR (400 MHz, CDCl<sub>3</sub>, 298 K) δ = 8.81 (s, 1H), 8.53 (m, 1H), 7.96 (m, 1H), 7.85 (7.85 (t, J = 7.9 Hz, 1H)), 7.79 (d, J = 7.7 Hz, 2H), 7.69 (s, 1H), 6.44–6.40 (t, 1H).

#### Synthesis of 3,3',5,5'-tetrabromo-1,1'-biphenyl (**4**):

1,3,5-tribromobenzene (1.58 g, 5 mmol, 5 equiv) was dissolved in 60 mL anhydrous ether solution which was cooled to -78 °C. After that, n-BuLi (1.2 mL, 3 mmol, 3 equiv) was slowly added into the mixed solution with a constant pressure dropping funnel under N<sub>2</sub> atmosphere, then the reaction mixture was stirred under -78 °C for 4 h. Finally, added CuCl<sub>2</sub> (403 mg, 3 mmol, 3 equiv) to the reaction solution and reacted at

room temperature for 16 hours, while added ammonium chloride aqueous solution to quench n-BuLi. The crude product was treated with a saturated EDTA aqueous solution (100 mL) to remove residual Cu<sup>2+</sup> ions and then purified by column chromatography (SiO<sub>2</sub>, PE) to afford compound **4** as a white powder (1.2 g, 51%). <sup>1</sup>H NMR (400 MHz, CDCl<sub>3</sub>, 298 K) δ = 7.69 (t, J = 1.7 Hz, 1H), 7.59 (d, J = 1.7 Hz, 2H).

**Synthesis of 3,3',5,5'-tetrakis(1-(6-(1H-pyrazol-1-yl)pyridin-2-yl)-1H-pyrazol-4-yl)-1,1'-biphenyl (L):**

To a solution of anhydrous dioxane (20 mL), N,N-Dimethylformamide (10 mL) and H<sub>2</sub>O (5 mL), compound **4** (235 mg, 0.5 mmol, 1 equiv), compound **3** (1 g, 3 mmol, 6 equiv), K<sub>2</sub>CO<sub>3</sub> (1.66 g, 12 mmol, 24 equiv) and Pd(dppf)Cl<sub>2</sub> (110 mg, 0.15 mmol, 0.3 equiv) were added and the mixture was stirred at 90 °C overnight under N<sub>2</sub> atmosphere to give a black solution. The crude product was purified by column chromatography (SiO<sub>2</sub>, DCM/MeOH, v/v = 50/1) to afford ligand **L** as a white powder (150 mg, 30%). <sup>1</sup>H NMR (400 MHz, CDCl<sub>3</sub>, 298 K): δ = 8.96 (s, 1H), 8.68–8.64 (m, 1H), 8.21 (s, 1H), 8.03–7.96 (t, 1H), 7.96–7.88 (m, 2H), 7.82 (m, 1H), 7.77 (s, 1H), 6.51–6.46 (t, 1H).

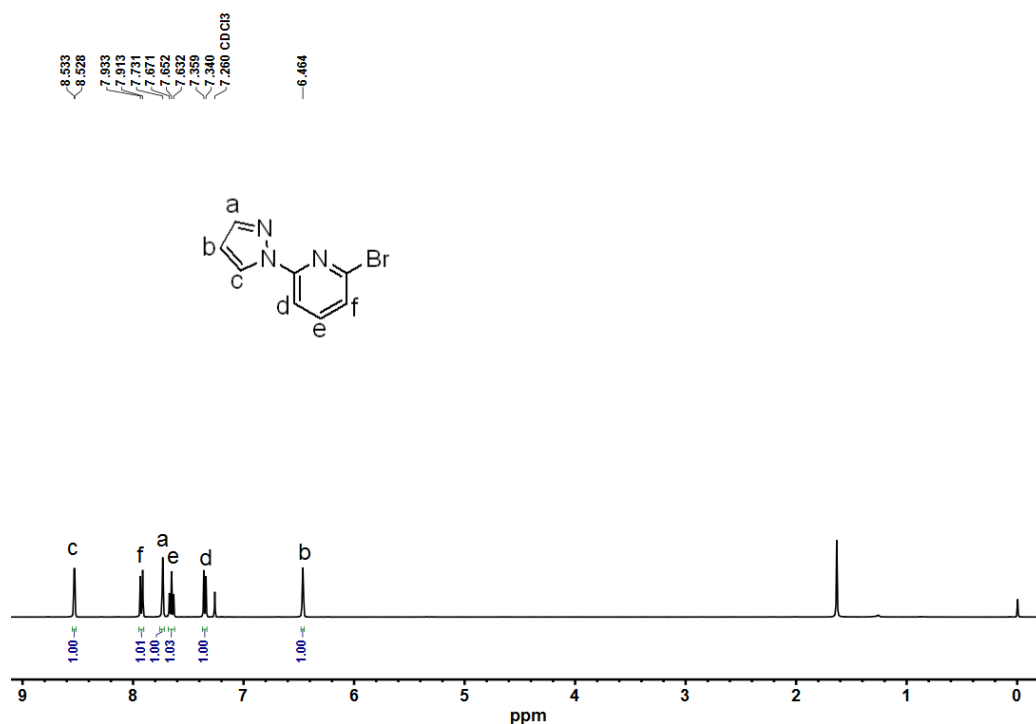

**Figure S1.** <sup>1</sup>H-NMR spectrum of **1** (400 MHz, CDCl<sub>3</sub>, 298 K).

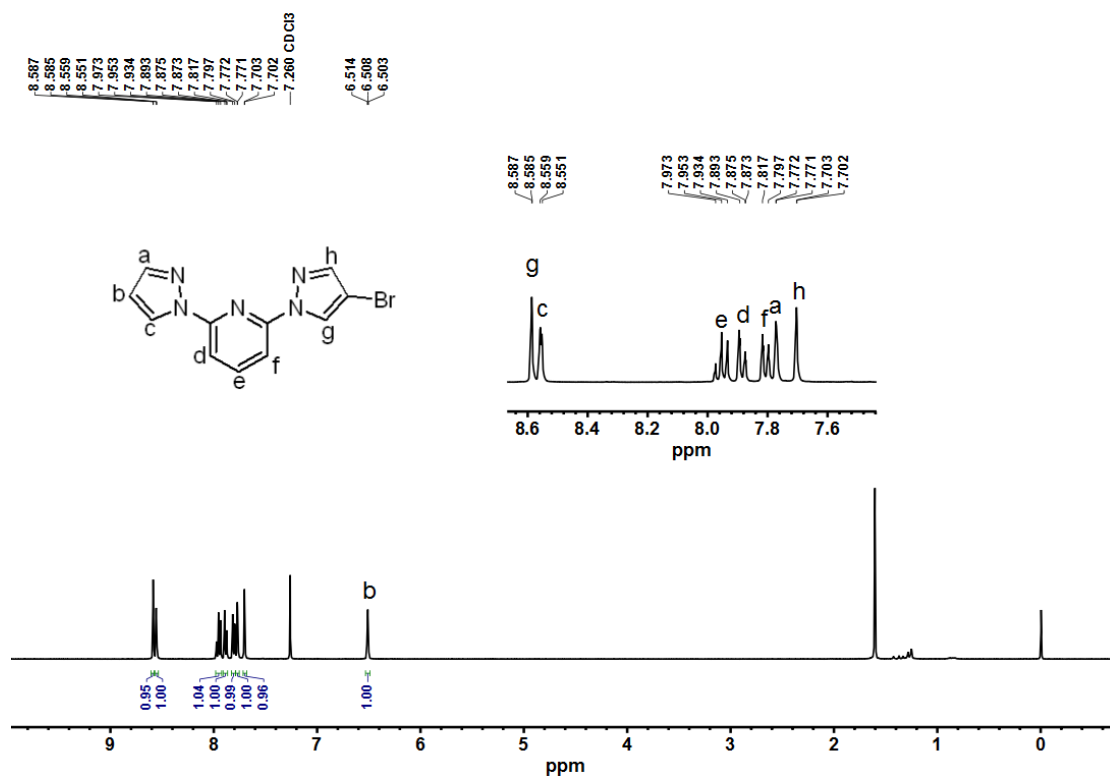

**Figure S2.** <sup>1</sup>H-NMR spectrum of **2** (400 MHz, CDCl<sub>3</sub>, 298 K).

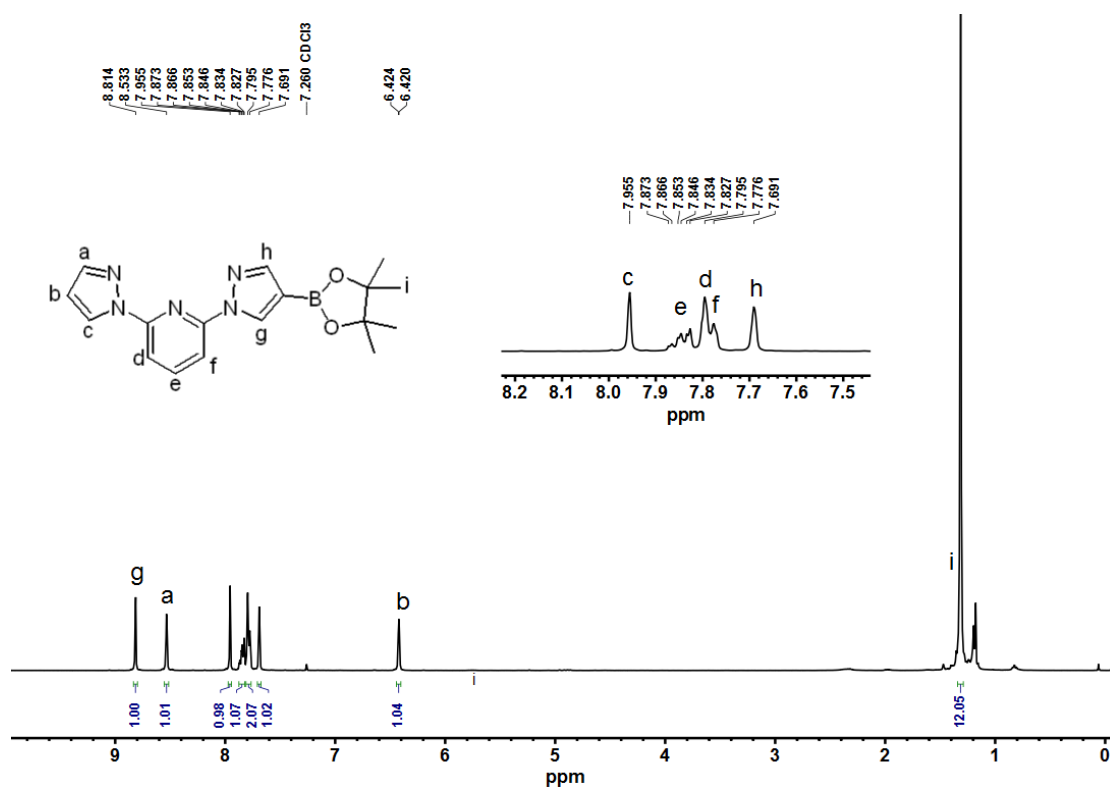

**Figure S3.** <sup>1</sup>H-NMR spectrum of **3** (400 MHz, CDCl<sub>3</sub>, 298 K).

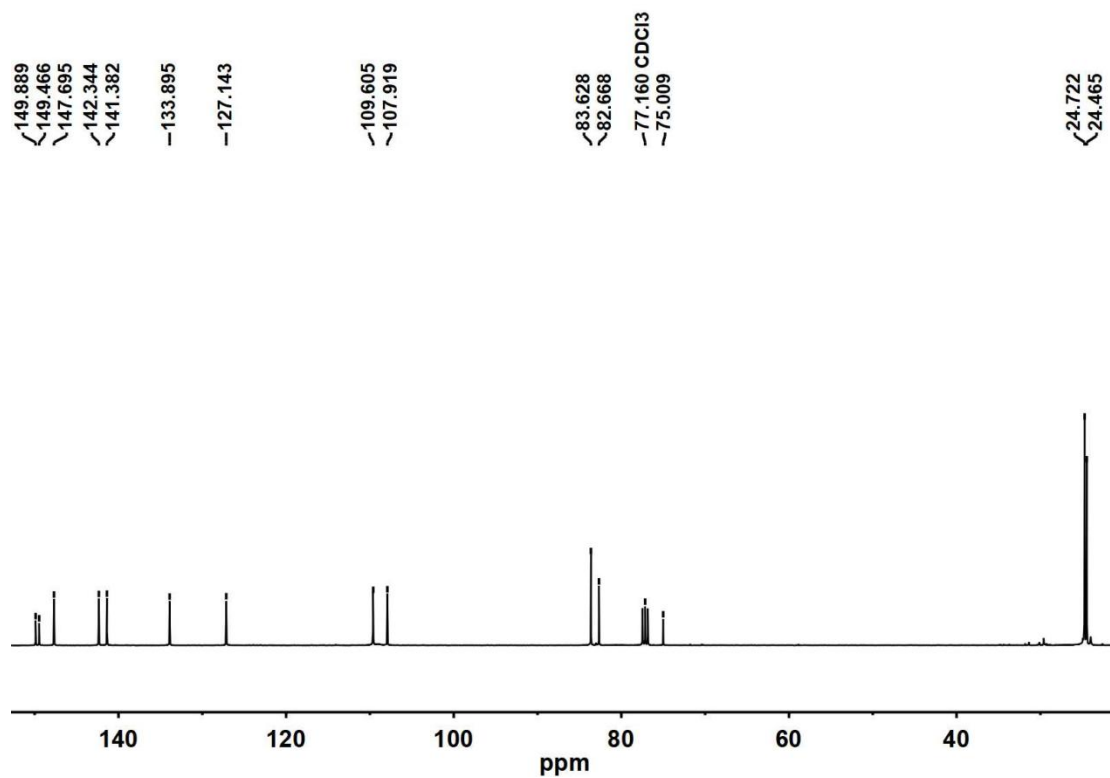

**Figure S4.**  $^{13}\text{C}$ -NMR spectrum of **3** (101 MHz,  $\text{CDCl}_3$ , 298 K).

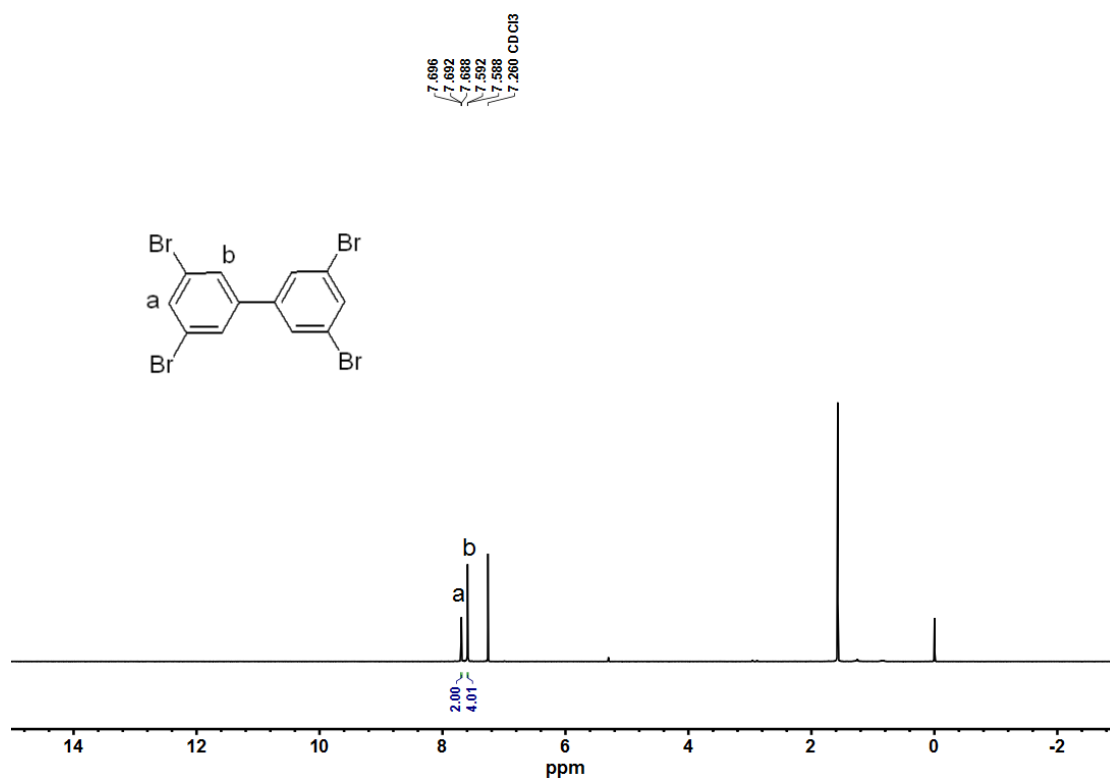

**Figure S5.**  $^1\text{H}$ -NMR spectrum of **4** (400 MHz,  $\text{CDCl}_3$ , 298 K).

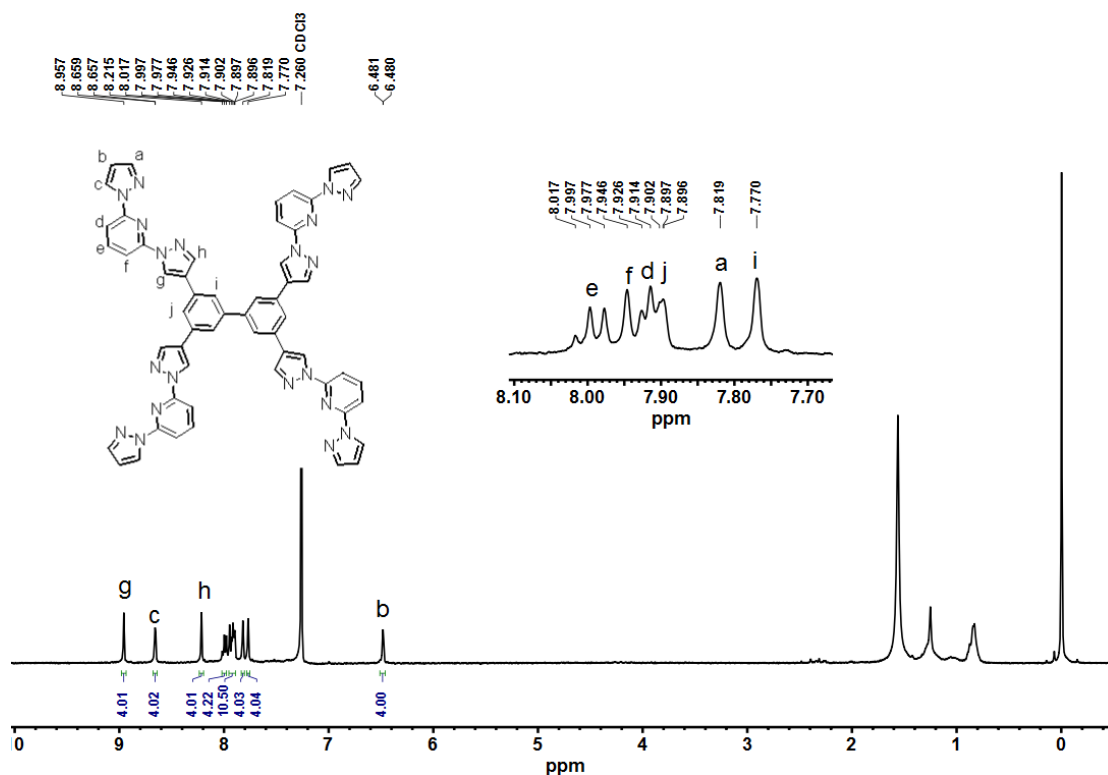

**Figure S6.**  $^1\text{H-NMR}$  spectrum of **L** (400 MHz,  $\text{CDCl}_3$ , 298 K).

## 2.2 Synthesis and characterization of cages.

Initially, the ligand **L** (3.0 equiv) was treated with  $\text{Ln}$  ions (4.0 equiv) in acetonitrile to fabricate the  $\text{Ln}_8\text{L}_6$  type structure. However, the suspension of the reaction system can't turn clear. Interestingly, when another 2.0 quive lanthanide ions (metal-to-ligand ratio = 2:1) was added into above solution, the solution gradually turned into homogeneous clear soluton after stried for several minutes. This result indicates that the self-assembly occur in a 2:1 metal-to-ligand ratio, other than 4:3.

### Synthesis and characterization of $\text{Ln}_4\text{L}_2$ :

The mixture of  $\text{La}(\text{CF}_3\text{SO}_3)_3$  (11.72 mg, 20 mmol, 2 eq), **L** (10.07 mg, 10 mmol, 1 eq) and 1 mL  $\text{CD}_3\text{CN}$  were sealed in a galss bottle and then stirred at  $70^\circ\text{C}$  for 20 minutes. This solution was characterized without further treatment. The synthesis procedures of  $\text{Nd}_4\text{L}_2$  is similar with that of  $\text{La}_4\text{L}_2$  by changing the  $\text{La}(\text{CF}_3\text{SO}_3)_3$  to  $\text{Nd}(\text{CF}_3\text{SO}_3)_3$ .

The  $^1\text{H NMR}$  spectrum of  $\text{La}_4\text{L}_2$  (400 MHz,  $\text{CD}_3\text{CN}$ , 298 K):  $\delta = 9.22$  (s, 1H), 8.92 (s, 1H), 8.87 (d,  $J = 2.7$  Hz, 1H), 8.72 (d,  $J = 2.5$  Hz, 1H), 8.33 (t,  $J = 8.1$  Hz, 1H), 8.19



(s, 1H), 8.05 (d, J = 8.2 Hz, 2H), 7.99 (t, J = 8.0 Hz, 2H), 7.94 (s, 1H), 7.88 (t, J = 8.1 Hz, 3H), 7.83 (s, 1H), 7.77 (d, J = 8.1 Hz, 1H), 7.61 (s, 1H), 7.49 (s, 2H), 6.92 – 6.89 (m, 2H), 6.83 (s, 1H). ESI-TOF-MS for  $\text{La}_4\text{L}_2$  showed continuous losing of the  $\text{OTf}^-$  anions:  $m/z$  calcd for  $[\text{La}_4\text{L}_2(\text{OTf})_{10}]^{2+}$  2013.4328, found 2013.4301; calcd for  $[\text{La}_4\text{L}_2(\text{OTf})_9]^{3+}$  1292.6377, found 1292.6353; calcd for  $[\text{La}_4\text{L}_2(\text{OTf})_8]^{4+}$  932.2399, found 932.2380; calcd for  $[\text{La}_4\text{L}_2(\text{OTf})_7]^{5+}$  716.0061, found 715.9999.

ESI-TOF-MS of  $\text{Nd}_4\text{L}_2$ : calcd for  $[\text{Nd}_4\text{L}_2(\text{OTf})_{10}]^{2+}$  2022.4394, found 2022.4315; calcd for  $[\text{Nd}_4\text{L}_2(\text{OTf})_9]^{3+}$  1298.6421, found 1298.6420; calcd for  $[\text{Nd}_4\text{L}_2(\text{OTf})_8]^{4+}$  936.7434, found 936.7424; calcd for  $[\text{Nd}_4\text{L}_2(\text{OTf})_7]^{5+}$  719.6042, found 719.6033.

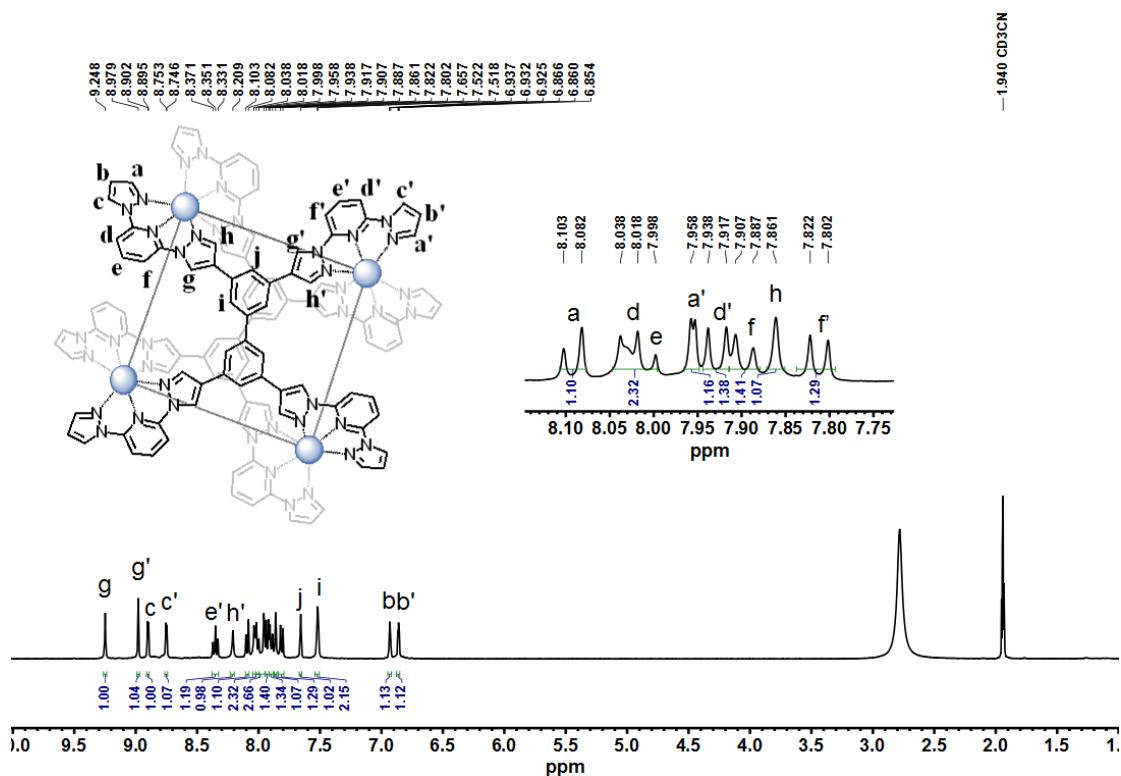

**Figure S7.**  $^1\text{H}$ -NMR spectrum of  $\text{La}_4\text{L}_2$  (400 MHz,  $\text{CD}_3\text{CN}$ , 298 K).

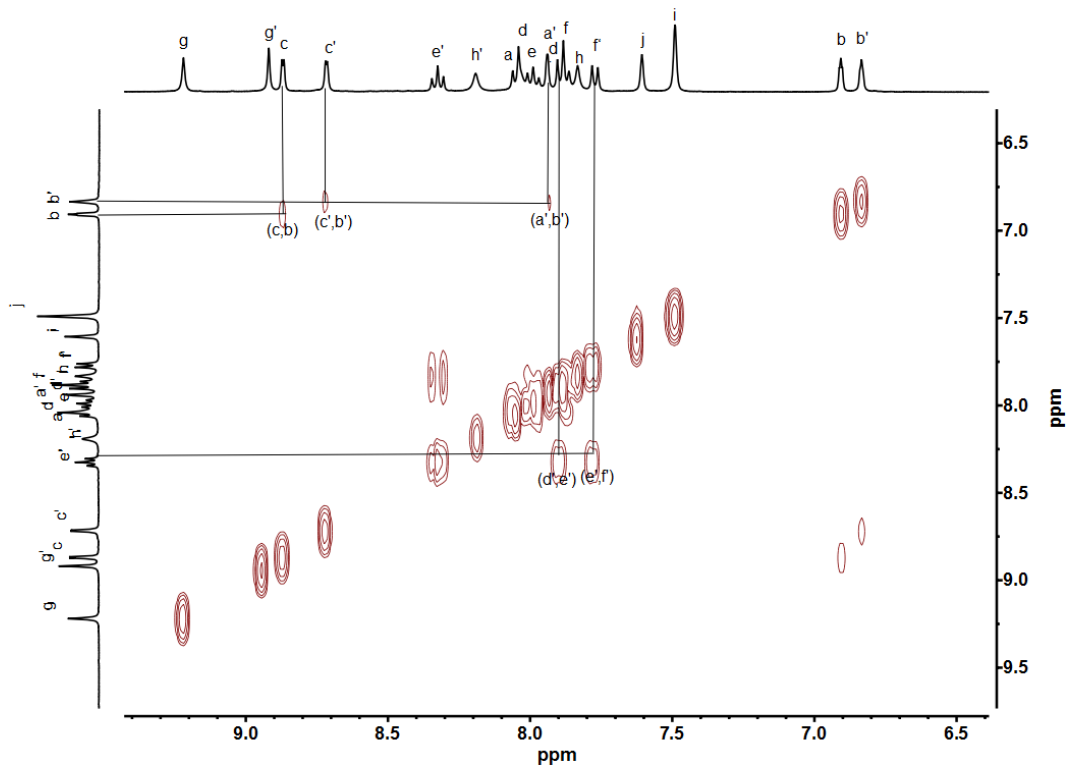

**Figure S8.**  $^1\text{H}$ - $^1\text{H}$  COSY spectrum of  $\text{La}_4\text{L}_2$  (400 MHz,  $\text{CD}_3\text{CN}$ , 298 K).

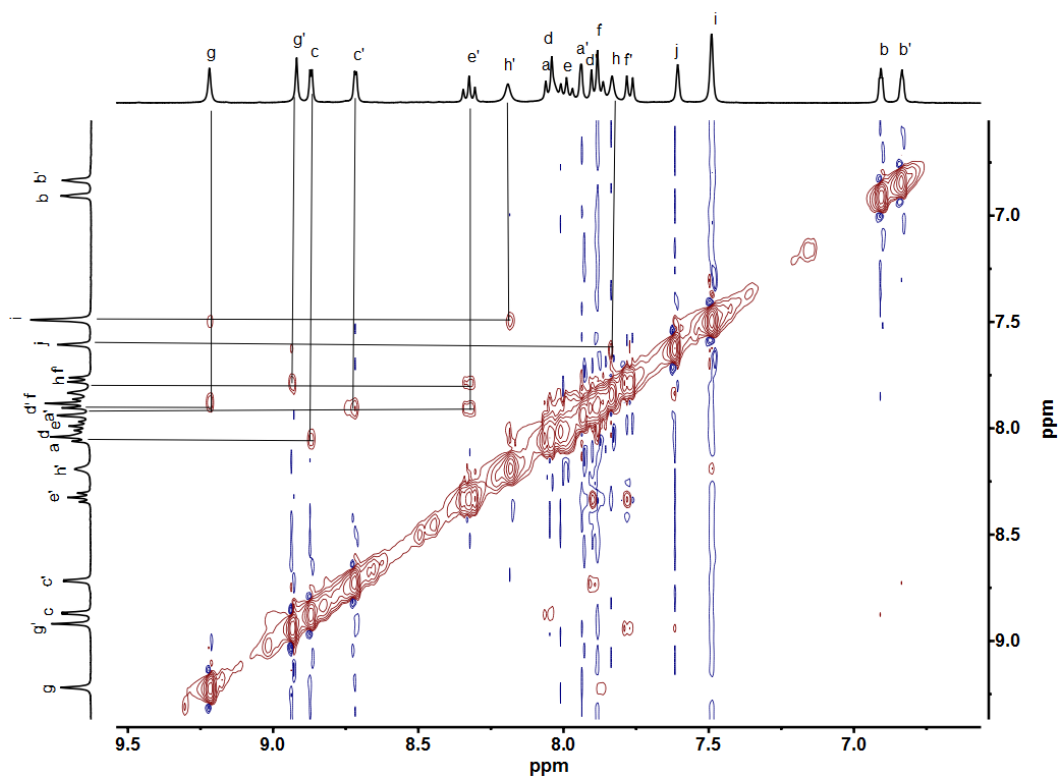

**Figure S9.**  $^1\text{H}$ - $^1\text{H}$  NOESY spectrum of  $\text{La}_4\text{L}_2$  (400 MHz,  $\text{CD}_3\text{CN}$ , 298 K).

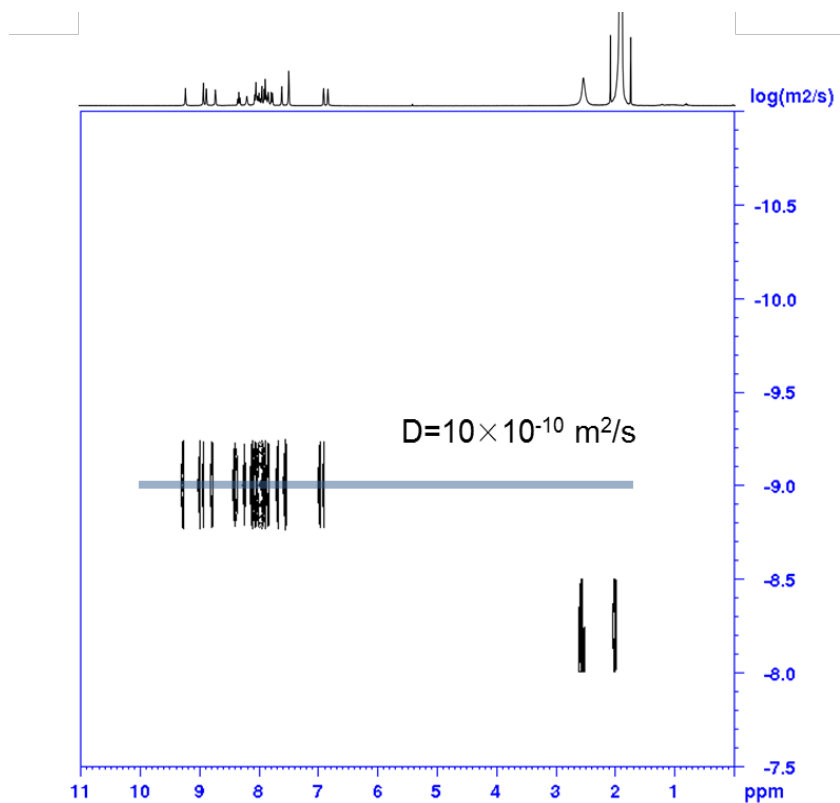

**Figure S10.**  $^1\text{H}$ - $^1\text{H}$  DOSY spectrum of  $\text{La}_4\text{L}_2$  (400 MHz,  $\text{CD}_3\text{CN}$ , 298 K).

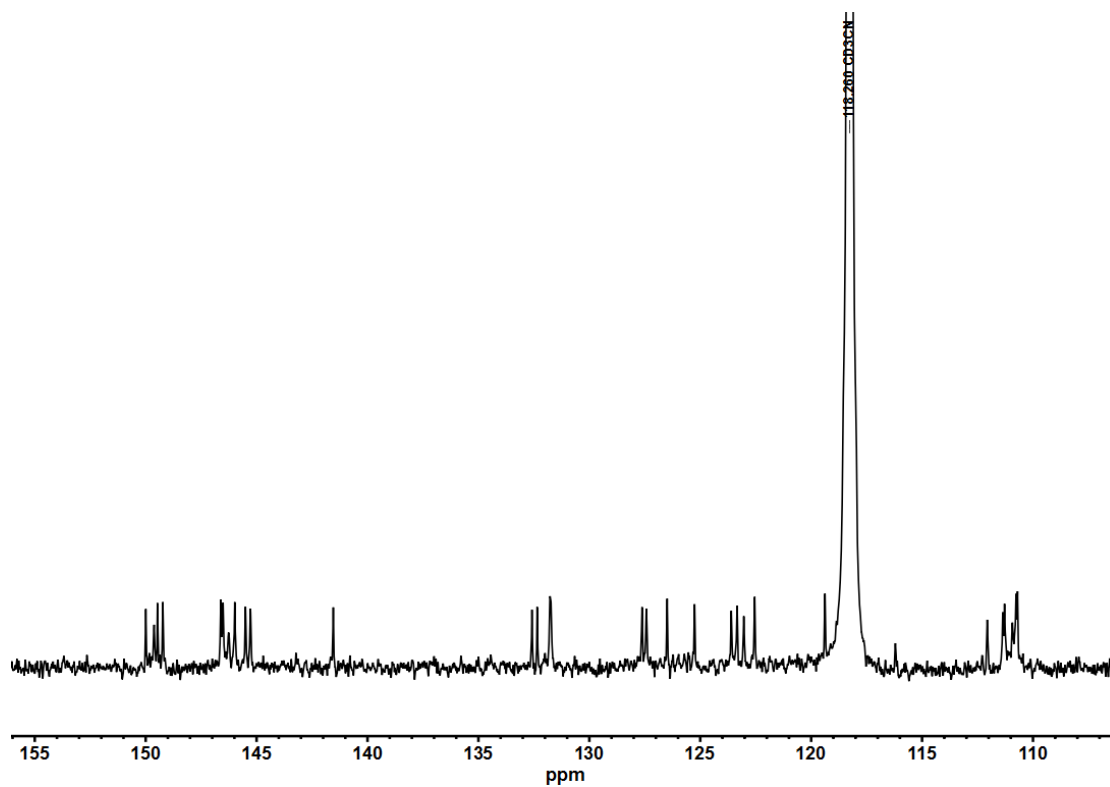

**Figure S11.**  $^{13}\text{C}$ -NMR spectrum of  $\text{La}_4\text{L}_2$  (101 MHz,  $\text{CD}_3\text{CN}$ , 298 K).

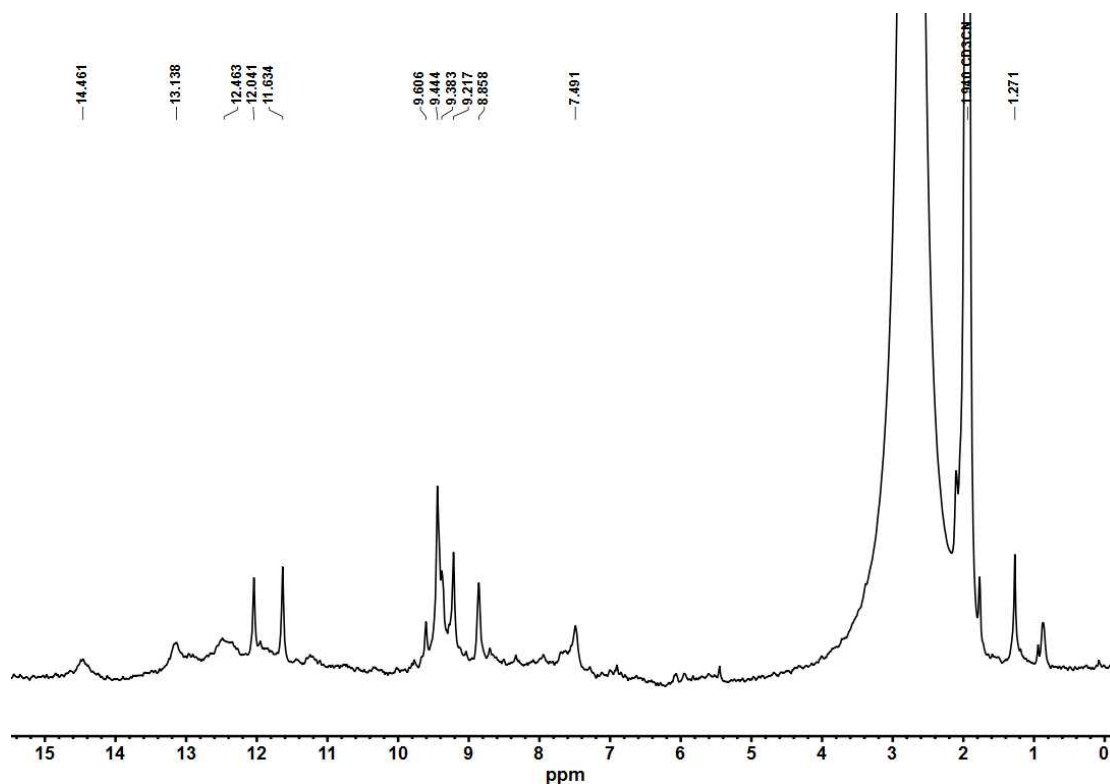

**Figure S12.**  $^1\text{H}$ -NMR spectrum of  $\text{Nd}_4\text{L}_2$  (400 MHz,  $\text{CD}_3\text{CN}$ , 298 K).

#### Synthesis and characterization of $\text{Ln}_8\text{L}_4$ :

The mixture of  $\text{Sm}(\text{CF}_3\text{SO}_3)_3$  (11.95 mg, 20 mmol, 2 eq), **L** (10.07 mg, 10 mmol, 1 eq) and 1 mL  $\text{CD}_3\text{CN}$  were sealed in a glass bottle and then stirred at 70 °C for 20 minutes. This solution was characterized without further treatment.  $^1\text{H}$  NMR spectra showed the quantitative formation of  $\text{Sm}_8\text{L}_4$ . By changing the  $\text{Sm}(\text{CF}_3\text{SO}_3)_3$  to  $\text{Eu}(\text{CF}_3\text{SO}_3)_3$ ,  $\text{Tb}(\text{CF}_3\text{SO}_3)_3$ ,  $\text{Dy}(\text{CF}_3\text{SO}_3)_3$  and  $\text{Ho}(\text{CF}_3\text{SO}_3)_3$ ,  $\text{Ln}_8\text{L}_4$  structure similar to  $\text{Sm}_8\text{L}_4$  can be obtained.

The  $^1\text{H}$  NMR spectrum of  $\text{Sm}_8\text{L}_4$  (400 MHz,  $\text{CD}_3\text{CN}$ , 298 K):  $\delta$  = 9.66 (s, 1H), 9.35 (s, 1H), 9.14 (d,  $J$  = 13.5 Hz, 2H), 8.96 (d,  $J$  = 3.0 Hz, 1H), 8.84 (s, 1H), 8.79 (d,  $J$  = 2.8 Hz, 1H), 8.72–8.67 (m, 2H), 8.62 (dd,  $J$  = 5.5, 2.9 Hz, 2H), 8.57 (t,  $J$  = 8.4 Hz, 1H), 8.53 (s, 0H), 8.45 (t,  $J$  = 8.2 Hz, 1H), 8.38 (d,  $J$  = 8.4 Hz, 1H), 8.27 (d,  $J$  = 8.3 Hz, 1H), 8.15–8.06 (m, 2H), 8.00 (dd,  $J$  = 14.0, 8.3 Hz, 2H), 7.95–7.90 (m, 1H), 7.88–7.83 (m, 2H), 7.81 (s, 2H), 7.66 (s, 1H), 7.60 (s, 1H), 7.46 (d,  $J$  = 8.4 Hz, 3H), 7.23 (d,  $J$  = 9.2 Hz, 2H), 7.00 (s, 1H), 6.91 (d,  $J$  = 2.5 Hz, 1H), 6.86 (d,  $J$  = 2.6 Hz, 1H), 6.68 (t,  $J$  = 2.3 Hz, 1H), 6.55 (t,  $J$  = 2.3 Hz, 1H), 5.98 (s, 1H). ESI-TOF-MS for  $\text{Sm}_8\text{L}_4$  showed

continuous losing of the OTf<sup>-</sup> anions: m/z calcd for [Sm<sub>8</sub>L<sub>4</sub>(OTf)<sub>20</sub>]<sup>4+</sup> 2027.4540, found 2027.4610; calcd for [Sm<sub>8</sub>L<sub>4</sub>(OTf)<sub>19</sub>]<sup>5+</sup> 1600.1756, found 1600.1769; calcd for [Sm<sub>8</sub>L<sub>4</sub>(OTf)<sub>18</sub>]<sup>6+</sup> 1308.6543, found 1308.6549; calcd for [Sm<sub>8</sub>L<sub>4</sub>(OTf)<sub>17</sub>]<sup>7+</sup> 1100.4247, found 1100.4248; calcd for [Sm<sub>8</sub>L<sub>4</sub>(OTf)<sub>16</sub>]<sup>8+</sup> 944.3526, found 944.3536; calcd for [Sm<sub>8</sub>L<sub>4</sub>(OTf)<sub>15</sub>]<sup>9+</sup> 822.7853, found 822.7847.

The <sup>1</sup>H NMR spectrum of Eu<sub>8</sub>L<sub>4</sub> (400 MHz, CD<sub>3</sub>CN, 298 K): δ = 8.49 (s, 1H), 8.21 (s, 1H), 8.13 (s, 1H), 7.92 (s, 2H), 7.83 (s, 1H), 7.66 (s, 1H), 7.54 (s, 1H), 7.35 (s, 1H), 6.81 (s, 1H), 6.64 (s, 1H), 6.10 (s, 1H), 5.92 (d, J = 20.7 Hz, 3H), 5.78 (d, J = 7.8 Hz, 2H), 5.73–5.62 (m, 3H), 5.38 (s, 2H), 5.22–5.09 (m, 3H), 4.88 (s, 3H), 4.65 (s, 1H), 4.51 (s, 1H), 4.41 (s, 1H), 4.27 (s, 2H), 4.15 (s, 1H), 4.05 (s, 1H), 3.22 (s, 2H). ESI-TOF-MS of Eu<sub>8</sub>L<sub>4</sub>: calcd for [Eu<sub>8</sub>L<sub>4</sub>(OTf)<sub>19</sub>]<sup>5+</sup> 1602.3782, found 1602.3752; calcd for [Eu<sub>8</sub>L<sub>4</sub>(OTf)<sub>18</sub>]<sup>6+</sup> 1310.4897, found 1310.4875; calcd for [Eu<sub>8</sub>L<sub>4</sub>(OTf)<sub>17</sub>]<sup>7+</sup> 1101.8580, found 1101.8536; calcd for [Eu<sub>8</sub>L<sub>4</sub>(OTf)<sub>16</sub>]<sup>8+</sup> 945.6054, found 945.5032; calcd for [Eu<sub>8</sub>L<sub>4</sub>(OTf)<sub>15</sub>]<sup>9+</sup> 824.0090, found 824.0077.

ESI-TOF-MS of Tb<sub>8</sub>L<sub>4</sub>: calcd for [Tb<sub>8</sub>L<sub>4</sub>(OTf)<sub>21</sub>]<sup>3+</sup> 2788.2771, found 2788.2810; calcd for [Tb<sub>8</sub>L<sub>4</sub>(OTf)<sub>20</sub>]<sup>4+</sup> 2053.9697, found 2053.9702; calcd for [Tb<sub>8</sub>L<sub>4</sub>(OTf)<sub>19</sub>]<sup>5+</sup> 1613.1868, found 1613.1853; calcd for [Tb<sub>8</sub>L<sub>4</sub>(OTf)<sub>18</sub>]<sup>6+</sup> 1319.4955, found 1319.4955; calcd for [Tb<sub>8</sub>L<sub>4</sub>(OTf)<sub>17</sub>]<sup>7+</sup> 1110.0035, found 1110.0028; calcd for [Tb<sub>8</sub>L<sub>4</sub>(OTf)<sub>16</sub>]<sup>8+</sup> 925.6340, found 925.6337; calcd for [Tb<sub>8</sub>L<sub>4</sub>(OTf)<sub>15</sub>]<sup>9+</sup> 833.3481, found 833.3492.

ESI-TOF-MS of Dy<sub>8</sub>L<sub>4</sub>: calcd for [Dy<sub>8</sub>L<sub>4</sub>(OTf)<sub>20</sub>]<sup>4+</sup> 2060.4759, found 2060.4780; calcd for [Dy<sub>8</sub>L<sub>4</sub>(OTf)<sub>19</sub>]<sup>5+</sup> 1619.1906, found 1619.8886; calcd for [Dy<sub>8</sub>L<sub>4</sub>(OTf)<sub>18</sub>]<sup>6+</sup> 1324.5001, found 1324.4993; calcd for [Dy<sub>8</sub>L<sub>4</sub>(OTf)<sub>17</sub>]<sup>7+</sup> 1114.0069, found 1114.0051; calcd for [Dy<sub>8</sub>L<sub>4</sub>(OTf)<sub>16</sub>]<sup>8+</sup> 956.1369, found 956.1371; calcd for [Dy<sub>8</sub>L<sub>4</sub>(OTf)<sub>15</sub>]<sup>9+</sup> 833.3492, found 833.3481.

ESI-TOF-MS of Ho<sub>8</sub>L<sub>4</sub>: calcd for [Ho<sub>8</sub>L<sub>4</sub>(OTf)<sub>20</sub>]<sup>4+</sup> 2065.4807, found 2065.4768; calcd for [Ho<sub>8</sub>L<sub>4</sub>(OTf)<sub>19</sub>]<sup>5+</sup> 1622.5941, found 1622.5909; calcd for [Ho<sub>8</sub>L<sub>4</sub>(OTf)<sub>18</sub>]<sup>6+</sup> 1327.3368, found 1327.3330; calcd for [Ho<sub>8</sub>L<sub>4</sub>(OTf)<sub>17</sub>]<sup>7+</sup> 1167.4379, found 1167.4352; calcd for [Ho<sub>8</sub>L<sub>4</sub>(OTf)<sub>16</sub>]<sup>8+</sup> 985.2641, found 985.2610; calcd for [Ho<sub>8</sub>L<sub>4</sub>(OTf)<sub>15</sub>]<sup>9+</sup> 835.2400, found 835.2360.

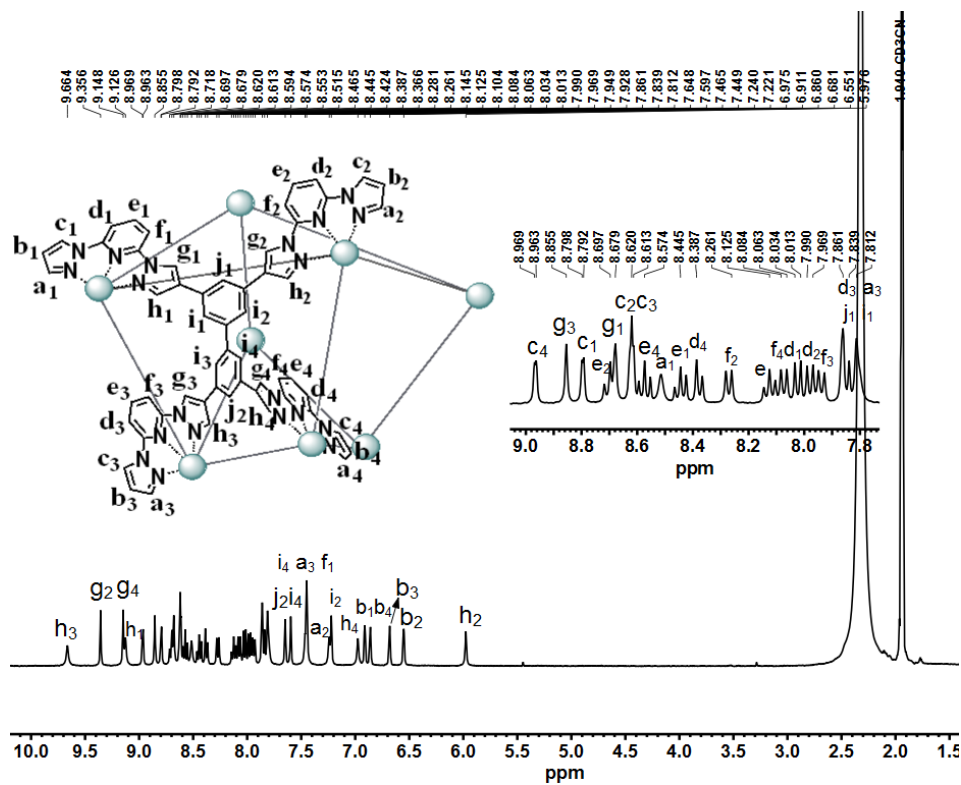

Figure S13.  $^1\text{H}$ -NMR spectrum of  $\text{Sm}_8\text{L}_4$  (400 MHz,  $\text{CD}_3\text{CN}$ , 298 K).

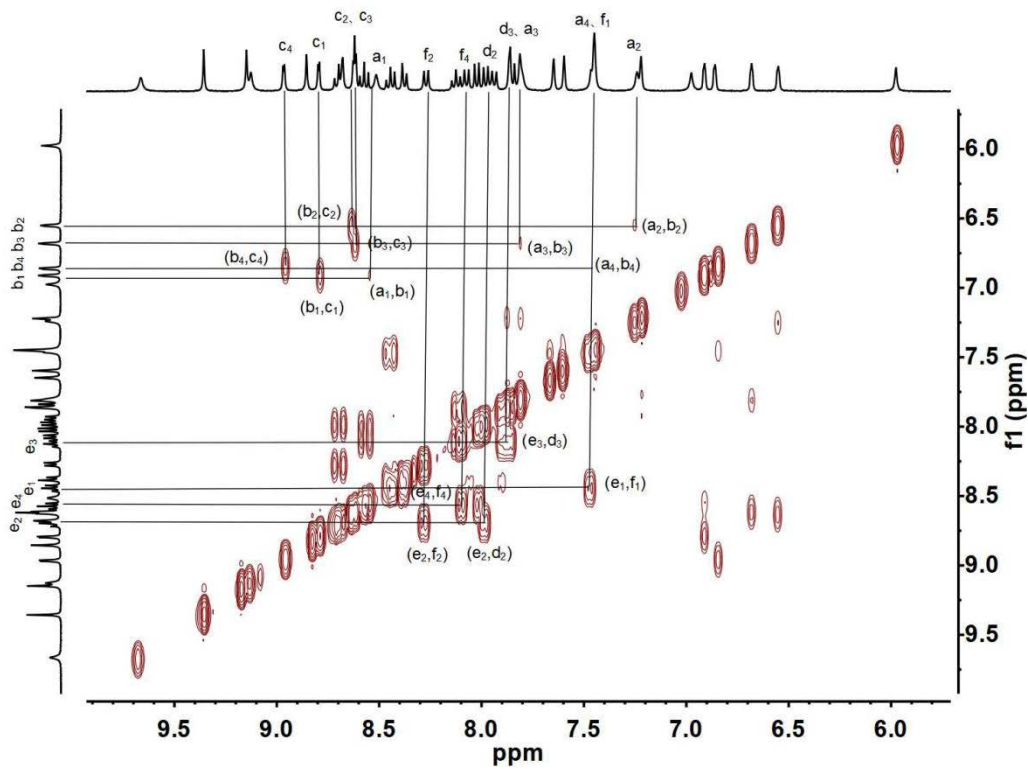

Figure S14.  $^1\text{H}$ - $^1\text{H}$  COSY spectrum of  $\text{Sm}_8\text{L}_4$  (400 MHz,  $\text{CD}_3\text{CN}$ , 298 K).

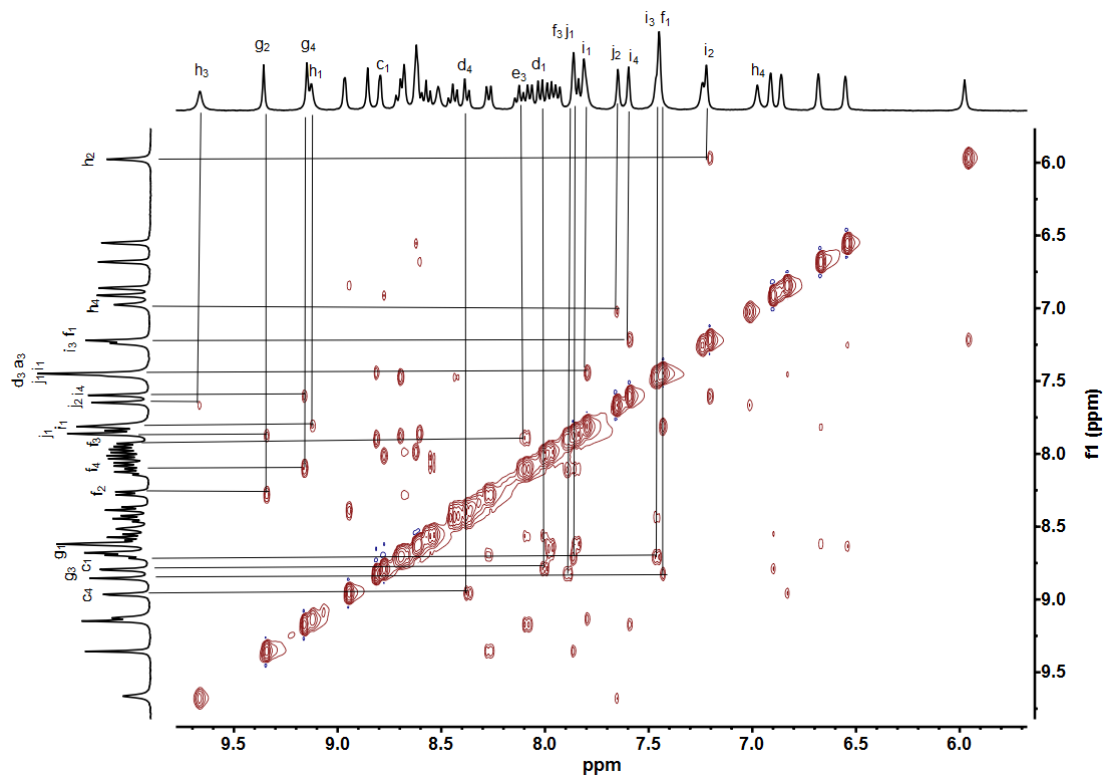

Figure S15. <sup>1</sup>H-<sup>1</sup>H NOESY spectrum of Sm<sub>8</sub>L<sub>4</sub> (400 MHz, CD<sub>3</sub>CN, 298 K).

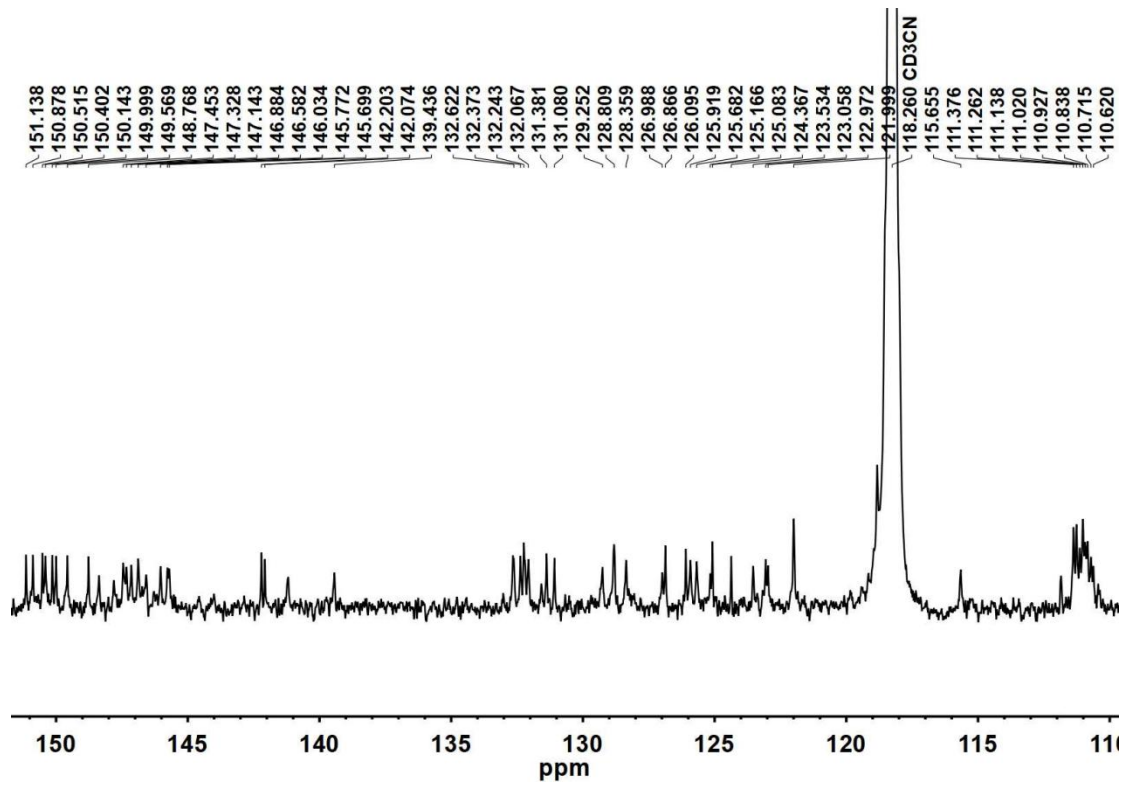

Figure S16. <sup>13</sup>C-NMR spectrum of Sm<sub>8</sub>L<sub>4</sub> (101 MHz, CD<sub>3</sub>CN, 298 K).

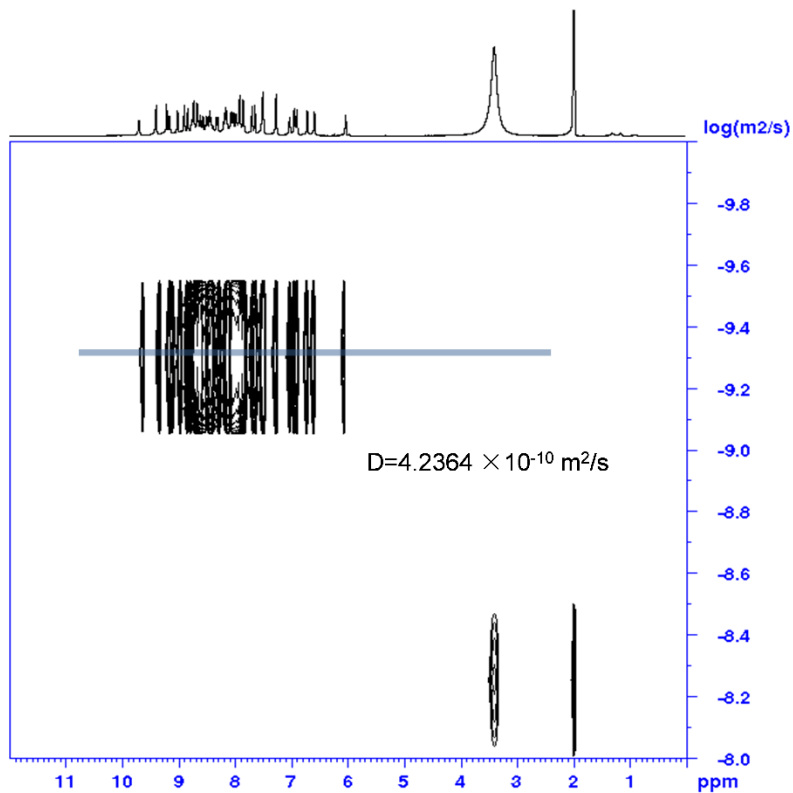

**Figure S17.**  $^1\text{H}$ - $^1\text{H}$  DOSY spectrum of  $\text{Sm}_8\text{L}_4$  (400 MHz,  $\text{CD}_3\text{CN}$ , 298 K).

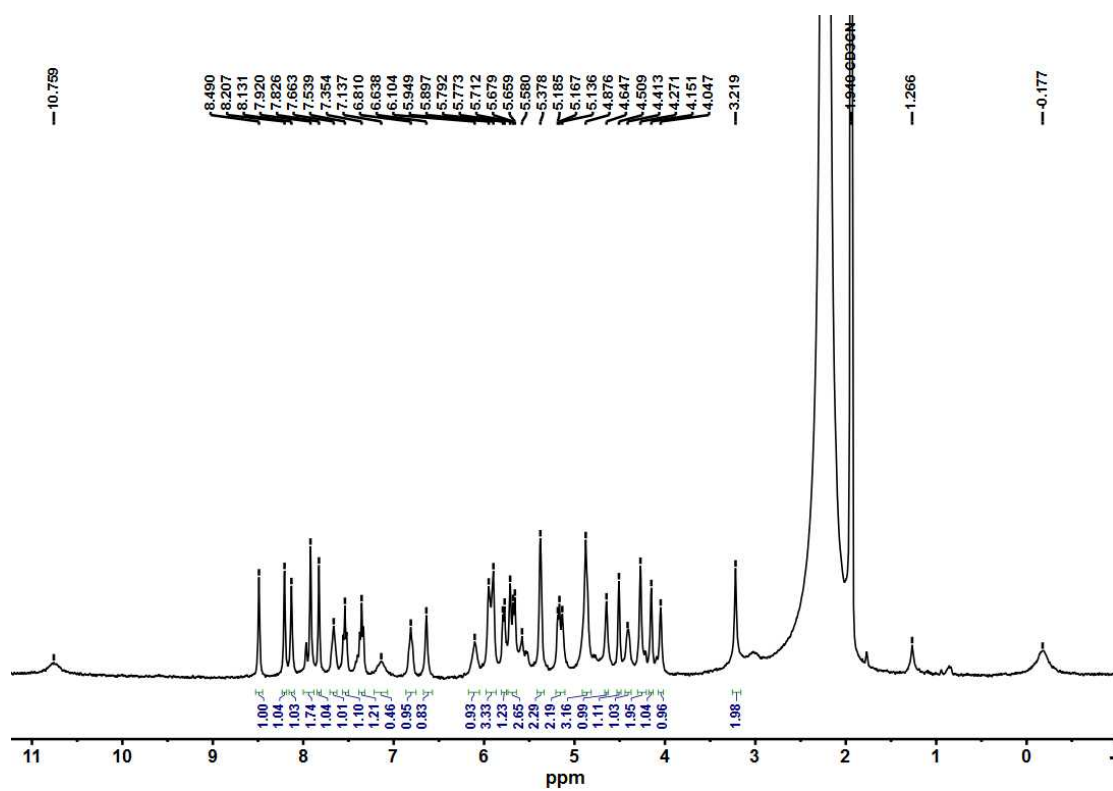

**Figure S18.**  $^1\text{H}$ -NMR spectrum of  $\text{Eu}_8\text{L}_4$  (400 MHz,  $\text{CD}_3\text{CN}$ , 298 K).



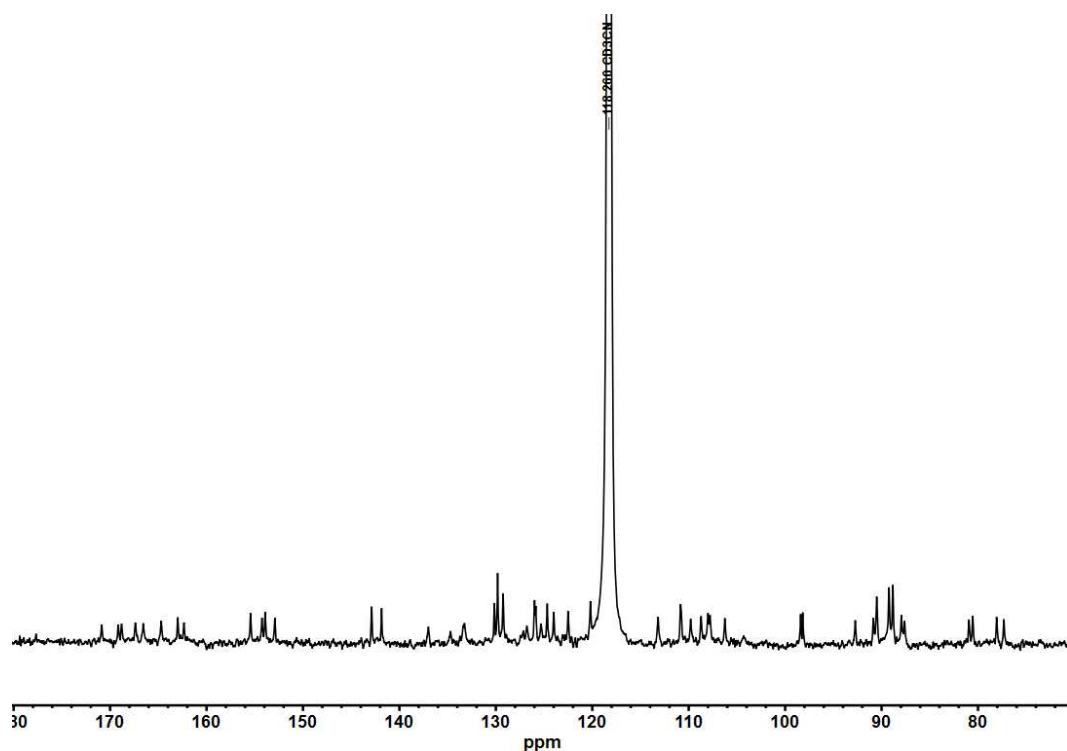

**Figure S19.**  $^{13}\text{C}$ -NMR spectrum of  $\text{Eu}_8\text{L}_4$  (101 MHz,  $\text{CD}_3\text{CN}$ , 298 K).

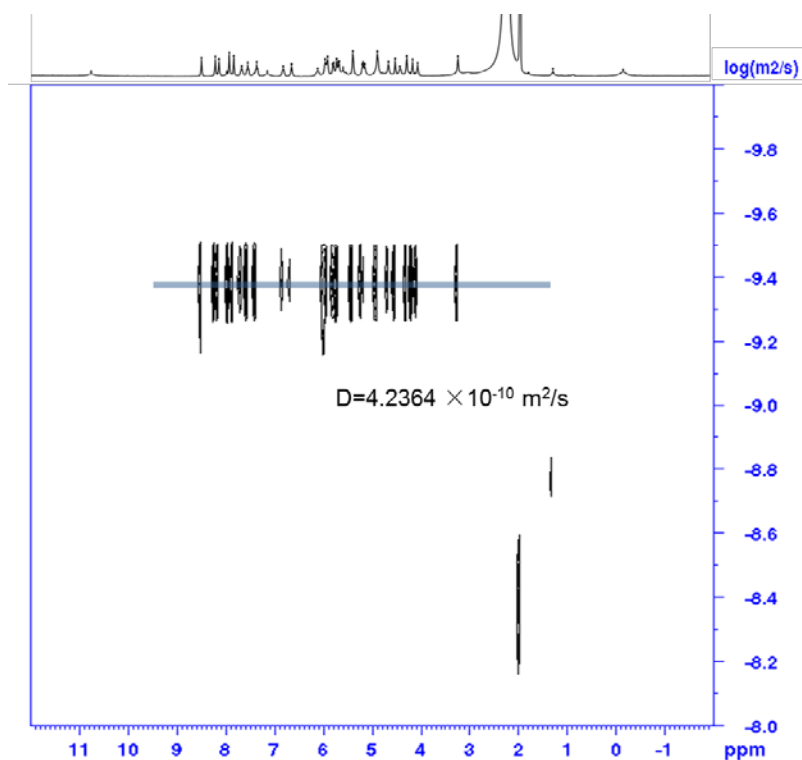

**Figure S20.**  $^1\text{H}$ - $^1\text{H}$  DOSY spectrum of  $\text{Eu}_8\text{L}_4$  (400 MHz,  $\text{CD}_3\text{CN}$ , 298 K).

#### Synthesis and characterization of mixed $\text{Ln}_8\text{L}_4$ and $\text{Ln}_6\text{L}_3$ :

The mixture of  $\text{Lu}(\text{CF}_3\text{SO}_3)_3$  (12.44 mg, 20 mmol, 2 eq), **L** (10.07 mg, 10 mmol, 1 eq) and 1 mL  $\text{CD}_3\text{CN}$  were sealed in a glass bottle and then stirred at 70 °C for 20 minutes.

This solution was characterized without further treatment.  $^1\text{H}$  NMR spectra and ESI - MS spectra showed the formation of  $\text{Lu}_8\text{L}_4$  and  $\text{Lu}_6\text{L}_3$  mixture. Similar mixture were also observed in the assembly solution of ligand **L** and  $\text{Er}(\text{CF}_3\text{SO}_3)_3$ .

ESI-TOF-MS of  $\text{Er}_8\text{L}_4$ : calcd for  $[\text{Er}_8\text{L}_4(\text{OTf})_{20}]^{4+}$  2069.9739, found 2069.9736; calcd for  $[\text{Er}_8\text{L}_4(\text{OTf})_{19}]^{5+}$  1626.1966, found 1626.1952; calcd for  $[\text{Er}_8\text{L}_4(\text{OTf})_{18}]^{6+}$  1130.3384, found 1130.3337; calcd for  $[\text{Er}_8\text{L}_4(\text{OTf})_{17}]^{7+}$  1119.0111, found 1119.0070; calcd for  $[\text{Er}_8\text{L}_4(\text{OTf})_{16}]^{8+}$  960.6411, found 960.6378; calcd for  $[\text{Er}_8\text{L}_4(\text{OTf})_{15}]^{9+}$  835.2400, found 835.2360. calcd for  $[\text{Er}_6\text{L}_3(\text{OTf})_{14}]^{4+}$  1515.4988, found 1515.4997; calcd for  $[\text{Er}_6\text{L}_3(\text{OTf})_{13}]^{5+}$  1182.6092, found 1182.6077; calcd for  $[\text{Er}_8\text{L}_4(\text{OTf})_{12}]^{6+}$  960.6823, found 960.6805.

ESI-TOF-MS of  $\text{Lu}_8\text{L}_4$ : calcd for  $[\text{Lu}_8\text{L}_4(\text{OTf})_{19}]^{5+}$  1638.6108, found 1638.6150; calcd for  $[\text{Lu}_8\text{L}_4(\text{OTf})_{18}]^{6+}$  1340.6836, found 1340.6809; calcd for  $[\text{Lu}_8\text{L}_4(\text{OTf})_{17}]^{7+}$  1127.8784, found 1127.8806; calcd for  $[\text{Lu}_8\text{L}_4(\text{OTf})_{16}]^{8+}$  968.2745, found 968.2791. calcd for  $[\text{Lu}_6\text{L}_3(\text{OTf})_{14}]^{4+}$  1526.7627, found 1526.7579; calcd for  $[\text{Lu}_6\text{L}_3(\text{OTf})_{13}]^{5+}$  1191.6172, found 1191.6196; calcd for  $[\text{Lu}_6\text{L}_3(\text{OTf})_{12}]^{6+}$  968.1882, found 968.1909; calcd for  $[\text{Lu}_6\text{L}_3(\text{OTf})_{11}]^{7+}$  808.5953, found 808.5990.

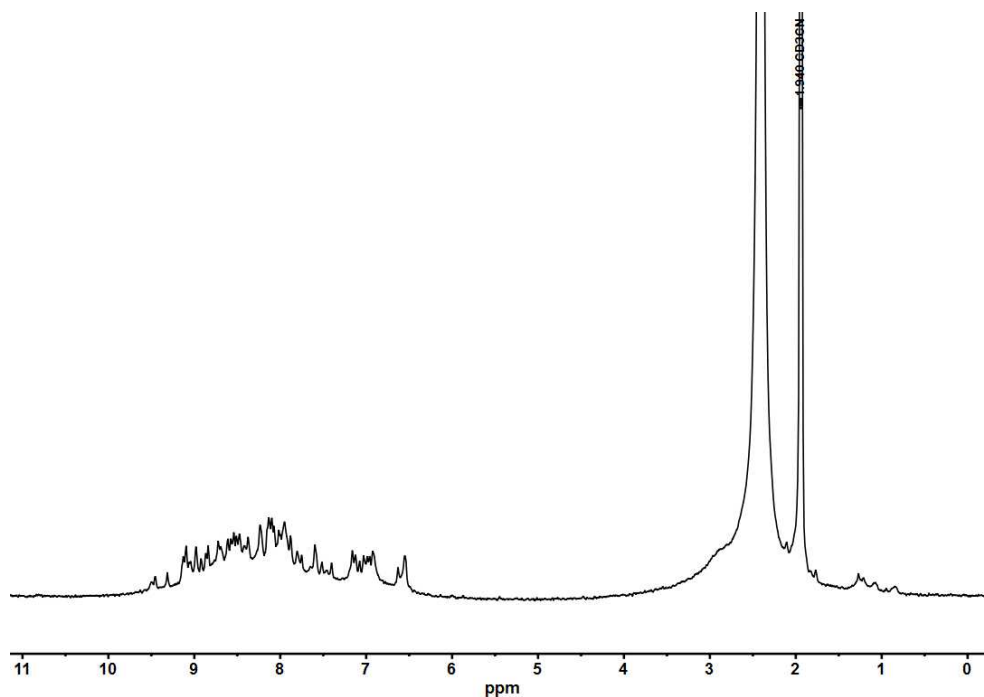

**Figure S21.**  $^1\text{H}$ -NMR spectrum of the assembly that fabricated by ligand **L** and  $\text{Lu}(\text{CF}_3\text{SO}_3)_3$  in a ratio of 1:2 (400 MHz,  $\text{CD}_3\text{CN}$ , 298 K).

### Structural and characterization of the assembly with excess lanthanide ions

The mixture of  $\text{Sm}(\text{CF}_3\text{SO}_3)_3$  (23.8 mg, 40  $\mu\text{mol}$ , 4 eq), **L** (10.07 mg, 10  $\mu\text{mol}$ , 1 eq) and 1 mL  $\text{CD}_3\text{CN}$  were sealed in a glass bottle and then stirred at 70 °C for 10 minutes, or add 1 eq  $\text{Sm}(\text{CF}_3\text{SO}_3)_3$  to the assembly solution of 1 eq  $\text{Sm}_8\text{L}_4$ . This solution was characterized without further treatment. ESI-TOF-MS spectra showed the formation of  $\text{Sm}_6\text{L}_3$ . The synthesis procedures of  $\text{Ln}_6\text{L}_3$  ( $\text{Ln} = \text{Eu}^{3+}$  and  $\text{Lu}^{3+}$ ) are similar with that of  $\text{Sm}_6\text{L}_3$  by changing the  $\text{Sm}(\text{CF}_3\text{SO}_3)_3$  to  $\text{Eu}(\text{CF}_3\text{SO}_3)_3$  and  $\text{Lu}(\text{CF}_3\text{SO}_3)_3$ .

The  $^1\text{H}$  NMR spectrum of  $\text{Sm}_6\text{L}_3$  (400 MHz,  $\text{CD}_3\text{CN}$ , 298 K):  $\delta = 9.34$  (s, 1H), 8.98 (s, 1H), 8.70 (s, 1H), 8.38 (t,  $J = 8.1$  Hz, 1H), 8.29 (t,  $J = 10.4$  Hz, 2H), 8.03 (d,  $J = 8.1$  Hz, 1H), 7.87 (d,  $J = 8.1$  Hz, 1H), 6.86 (s, 1H). ESI-TOF-MS of  $\text{Sm}_6\text{L}_3$ : calcd for  $[\text{Sm}_6\text{L}_3(\text{OTf})_{15}]^{3+}$  2036.9560, found 2036.9584; calcd for  $[\text{Sm}_6\text{L}_3(\text{OTf})_{14}]^{4+}$  1490.7292, found 1490.7315; calcd for  $[\text{Sm}_6\text{L}_3(\text{OTf})_{13}]^{5+}$  1162.3925, found 1162.3954; calcd for  $[\text{Sm}_6\text{L}_3(\text{OTf})_{12}]^{6+}$  944.0018, found 944.0047; calcd for  $[\text{Sm}_6\text{L}_3(\text{OTf})_{11}]^{7+}$  787.7243, found 787.7254.

The  $^1\text{H}$  NMR spectrum of  $\text{Eu}_6\text{L}_3$  (400 MHz,  $\text{CD}_3\text{CN}$ , 298 K):  $\delta = 8.14$  (s, 1H), 7.58 (s, 1H), 5.86 (d,  $J = 18.1$  Hz, 2H), 5.46–5.07 (m, 3H), 4.53 (s, 2H). ESI-TOF-MS of  $\text{Eu}_6\text{L}_3$ : calcd for  $[\text{Eu}_6\text{L}_3(\text{OTf})_{15}]^{3+}$  2040.2942, found 2040.2917; calcd for  $[\text{Eu}_6\text{L}_3(\text{OTf})_{14}]^{4+}$  1492.9825, found 1492.9832; calcd for  $[\text{Eu}_6\text{L}_3(\text{OTf})_{13}]^{5+}$  1164.5955, found 1164.5967; calcd for  $[\text{Eu}_6\text{L}_3(\text{OTf})_{12}]^{6+}$  945.6709, found 945.6721; calcd for  $[\text{Eu}_6\text{L}_3(\text{OTf})_{11}]^{7+}$  789.1532, found 789.1550.

The  $^1\text{H}$  NMR spectrum of  $\text{Lu}_6\text{L}_3$  (400 MHz,  $\text{CD}_3\text{CN}$ , 298 K):  $\delta = 9.48$  (s, 1H), 8.96 (s, 1H), 8.71 (s, 1H), 8.53–8.46 (t, 1H), 8.34 (d,  $J = 15.0$  Hz, 1H), 8.28 (s, 1H), 8.17 (d,  $J = 8.3$  Hz, 1H), 7.94 (d,  $J = 8.2$  Hz, 1H), 6.90 (s, 1H). ESI-TOF-MS of  $\text{Lu}_6\text{L}_3$ : calcd for  $[\text{Lu}_6\text{L}_3(\text{OTf})_{15}]^{3+}$  2086.0013, found 2086.0054; calcd for  $[\text{Lu}_6\text{L}_3(\text{OTf})_{14}]^{4+}$  1527.2629, found 1527.2653; calcd for  $[\text{Lu}_6\text{L}_3(\text{OTf})_{13}]^{5+}$  1192.0198, found 1192.0214; calcd for  $[\text{Lu}_6\text{L}_3(\text{OTf})_{12}]^{6+}$  968.5244, found 968.5271; calcd for  $[\text{Lu}_6\text{L}_3(\text{OTf})_{11}]^{7+}$  808.8849, found 808.8862.

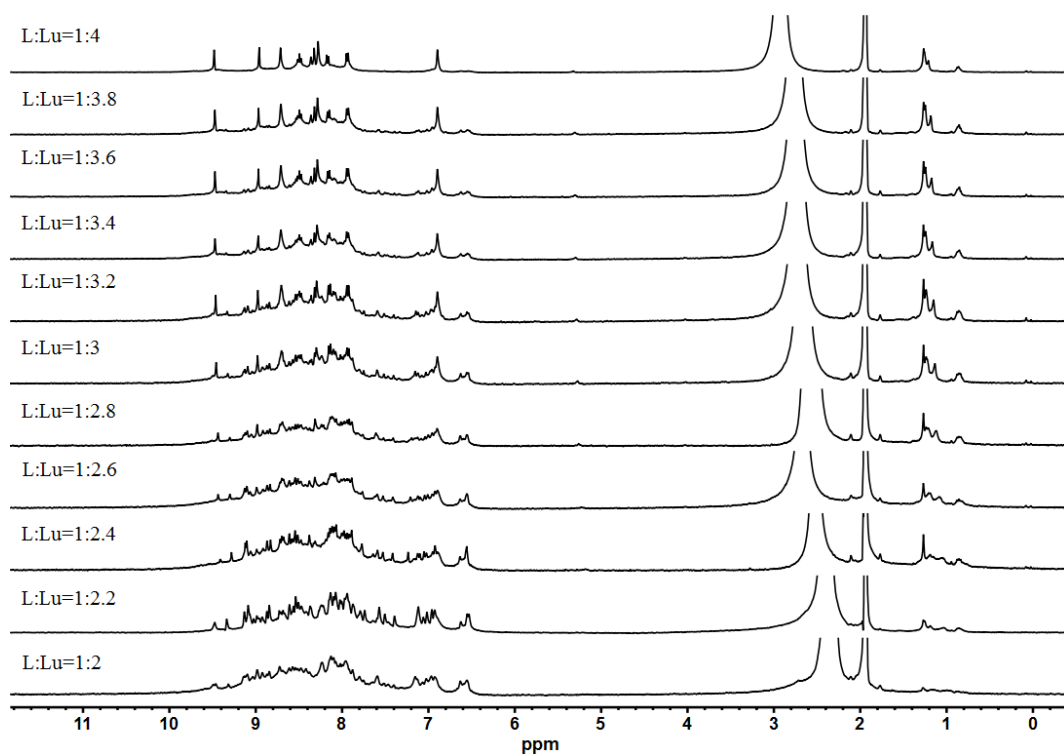

**Figure S22.**  $^1\text{H-NMR}$  titration spectrum of ligand **L** and  $\text{Lu}(\text{CF}_3\text{SO}_3)_3$  at different ratios (400 MHz,  $\text{CD}_3\text{CN}$ , 298 K).

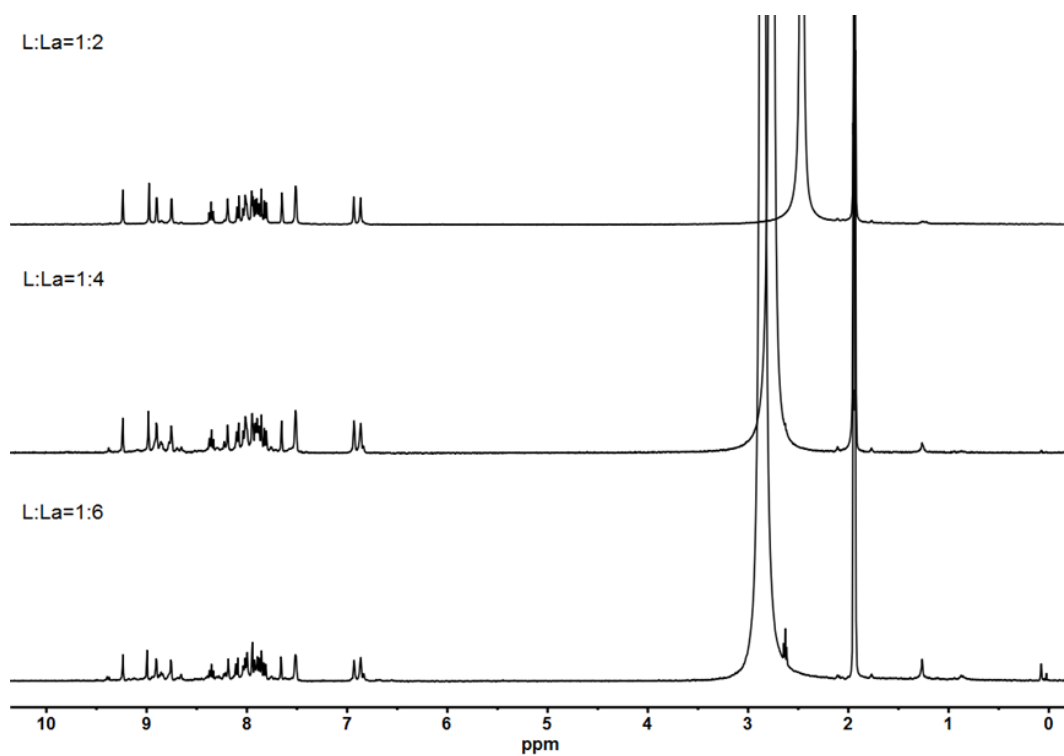

**Figure S23.**  $^1\text{H-NMR}$  spectrum of ligand **L** and  $\text{La}(\text{CF}_3\text{SO}_3)_3$  assembled in different ratios (400 MHz,  $\text{CD}_3\text{CN}$ , 298 K).

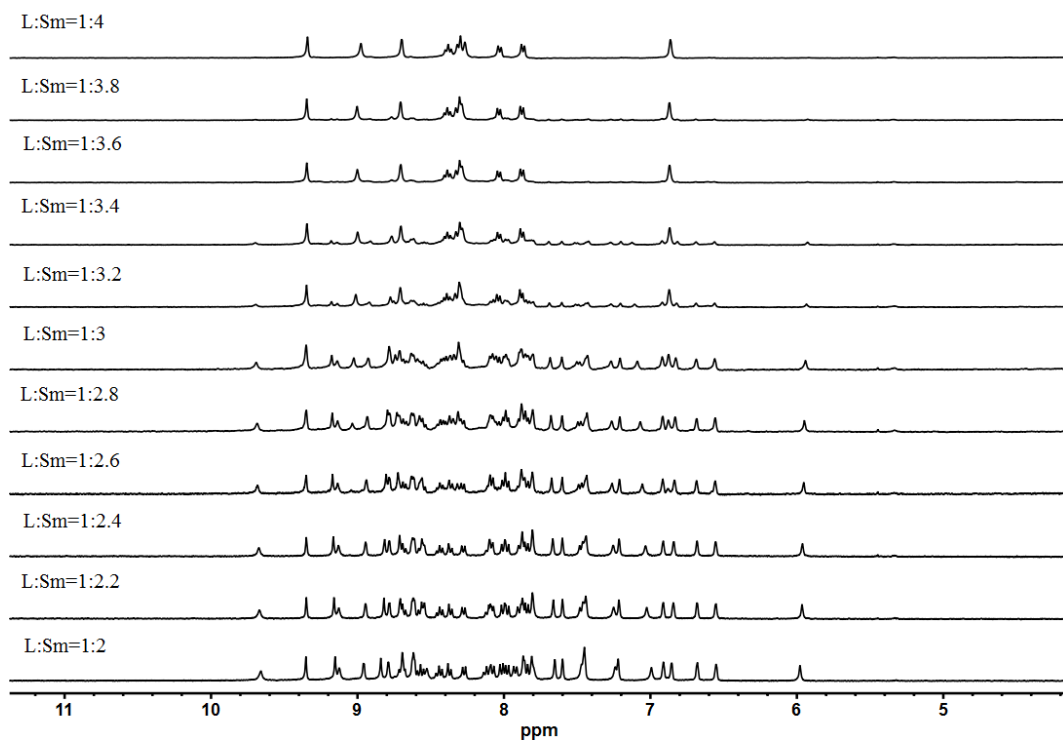

**Figure S24.**  $^1\text{H-NMR}$  titration spectrum of ligand **L** and  $\text{Sm}(\text{CF}_3\text{SO}_3)_3$  at different ratios (400 MHz,  $\text{CD}_3\text{CN}$ , 298 K).

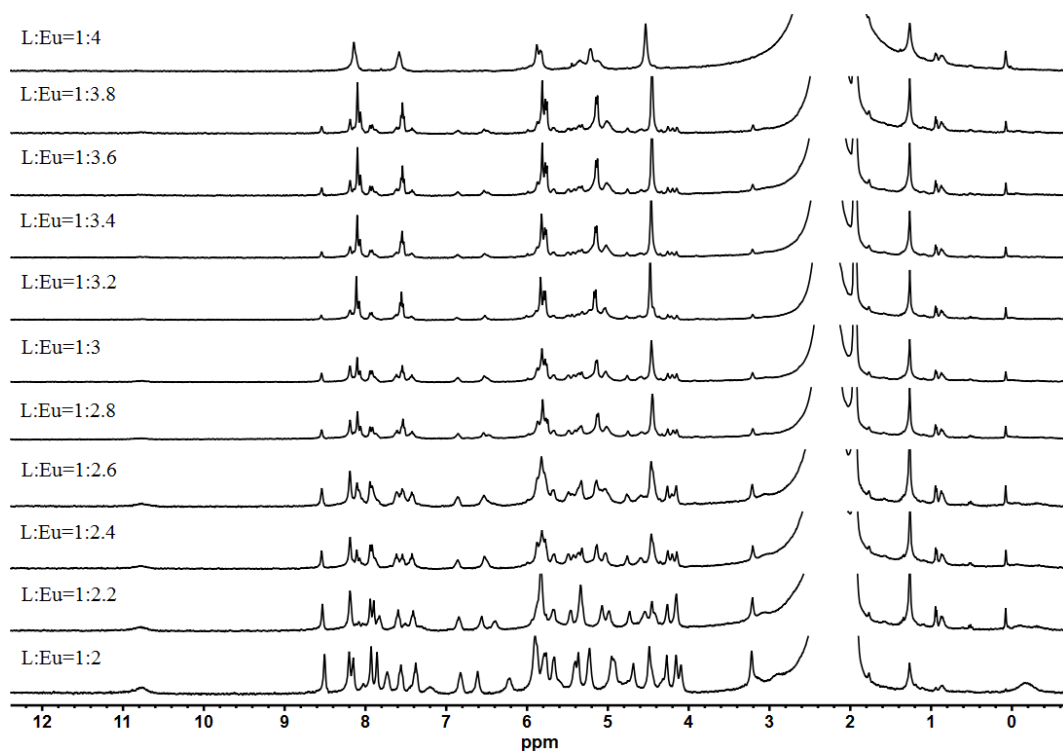

**Figure S25.**  $^1\text{H-NMR}$  titration spectrum of ligand **L** and  $\text{Eu}(\text{CF}_3\text{SO}_3)_3$  at different ratios (400 MHz,  $\text{CD}_3\text{CN}$ , 298 K).

## 2.3 ESI-TOF-MS spectra

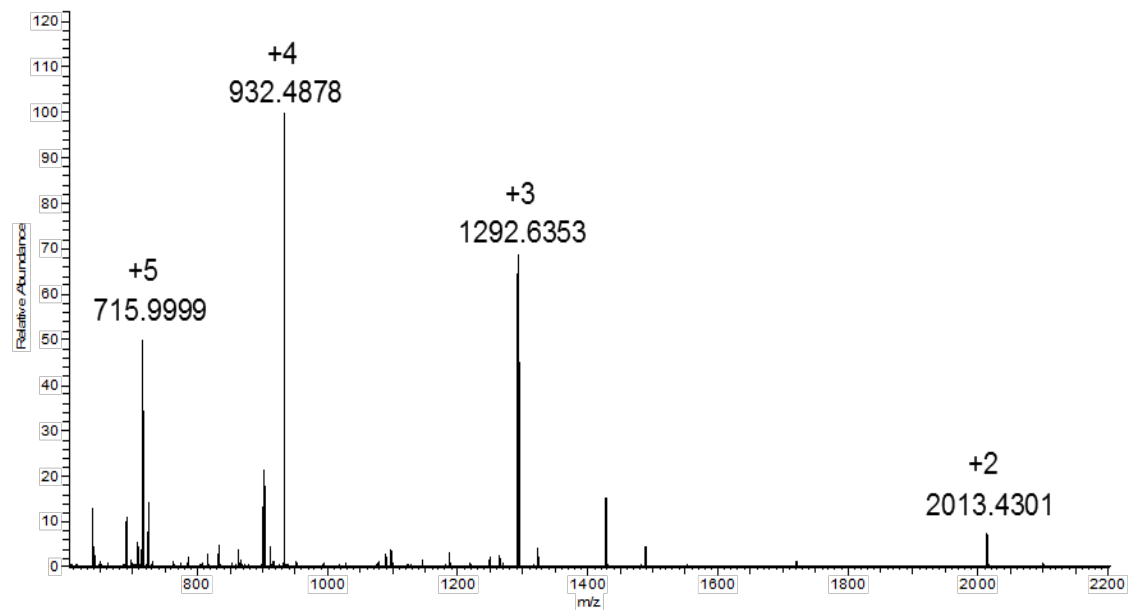

**Figure S26.** ESI-TOF-MS of complex  $\text{La}_4\text{L}_2$ .

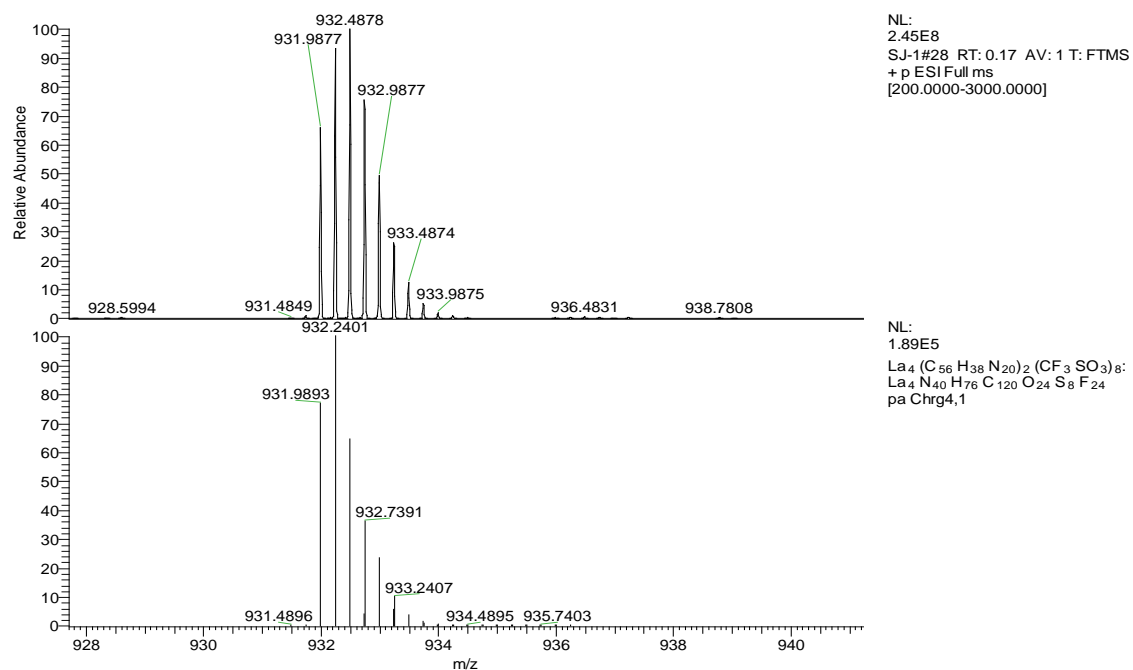

**Figure S27.** ESI-TOF-MS of complex  $\text{La}_4\text{L}_2$  with the observed and simulated isotopic patterns of the peaks corresponding to  $[\text{La}_4\text{L}_2(\text{OTf})_8]^{4+}$ .

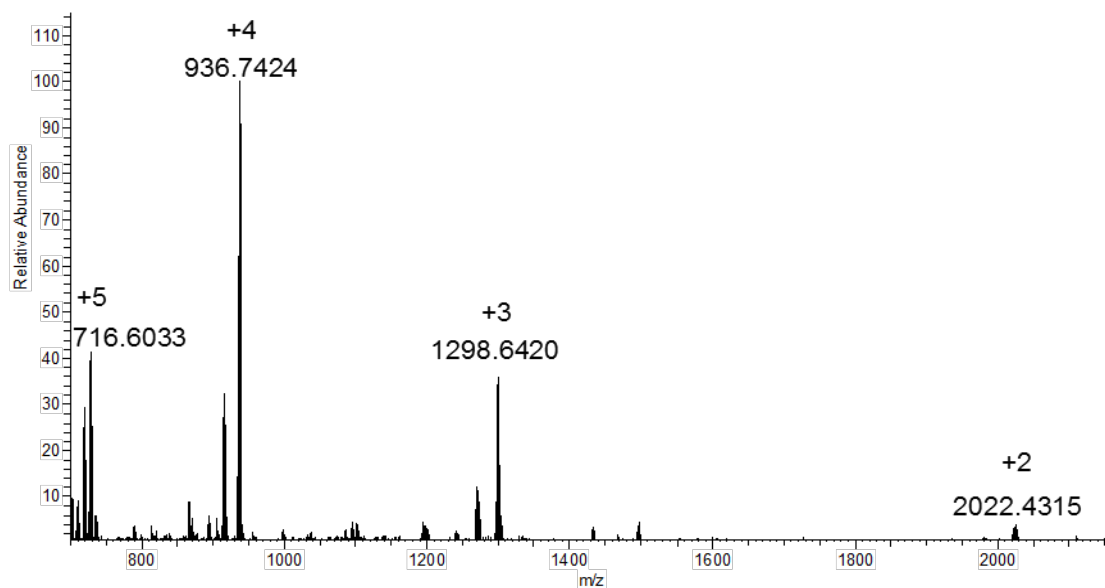

**Figure S28.** ESI-TOF-MS of complex  $\text{Nd}_4\text{L}_2$ .

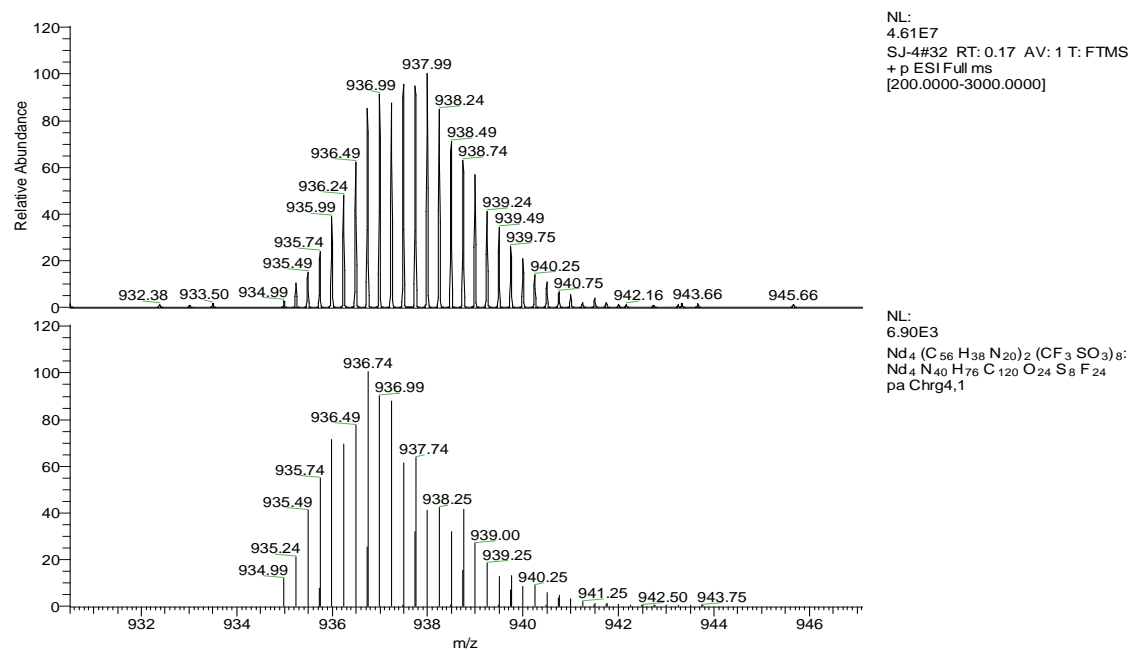

**Figure S29.** ESI-TOF-MS of complex  $\text{Nd}_4\text{L}_2$  with the observed and simulated isotopic patterns of the peaks corresponding to  $[\text{Nd}_4\text{L}_2(\text{OTf})_8]^{4+}$ .

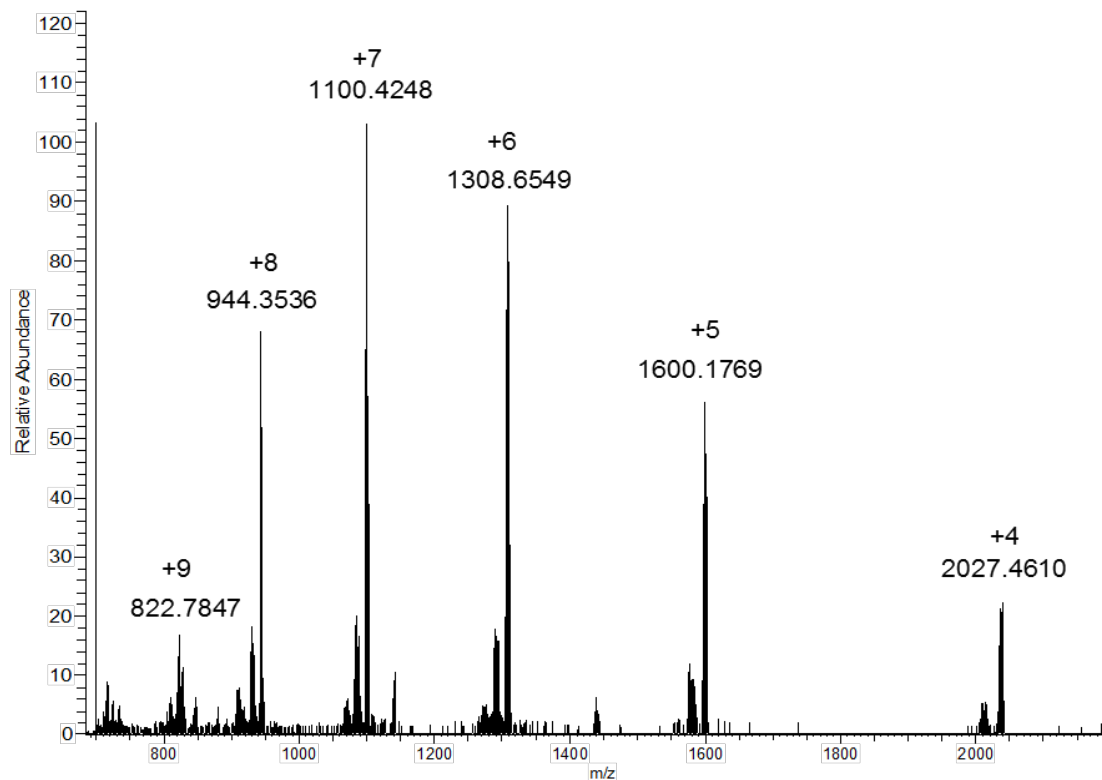

**Figure S30.** ESI-TOF-MS of complex  $\text{Sm}_8\text{L}_4$ .

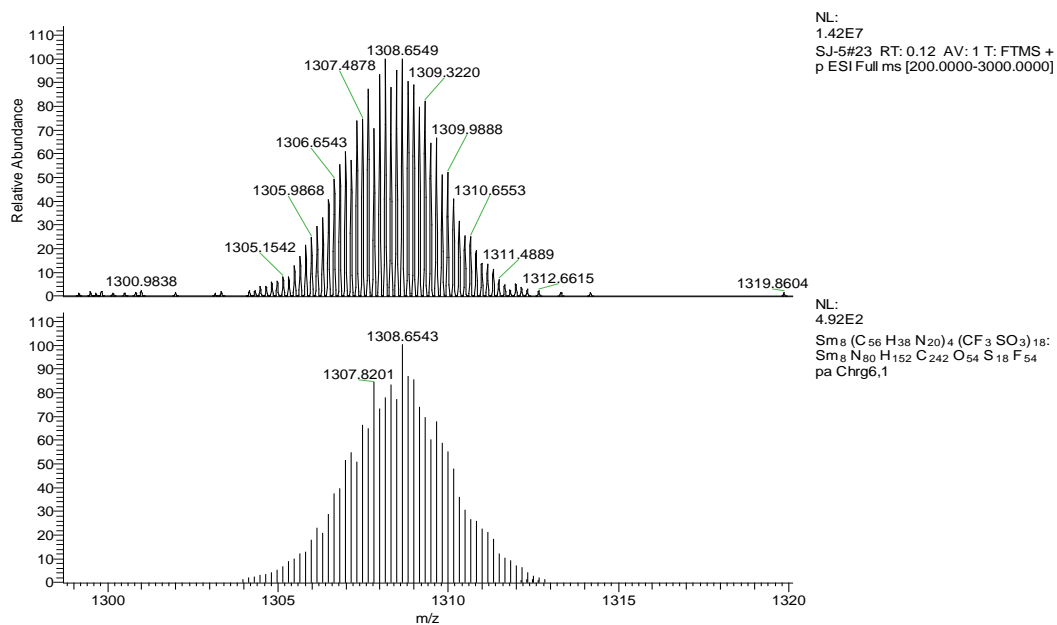

**Figure S31.** ESI-TOF-MS of complex  $\text{Sm}_8\text{L}_4$  with the observed and simulated isotopic patterns of the peaks corresponding to  $[\text{Sm}_8\text{L}_4(\text{OTf})_{18}]^{6+}$ .



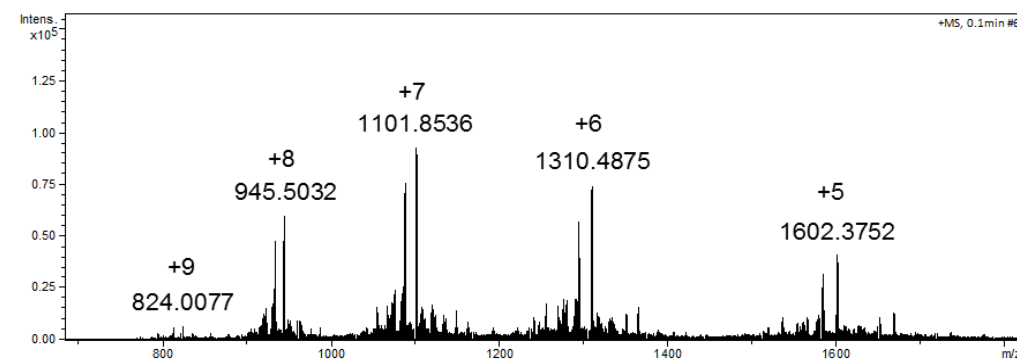

**Figure S32.** ESI-TOF-MS of complex  $\text{Eu}_8\text{L}_4$ .

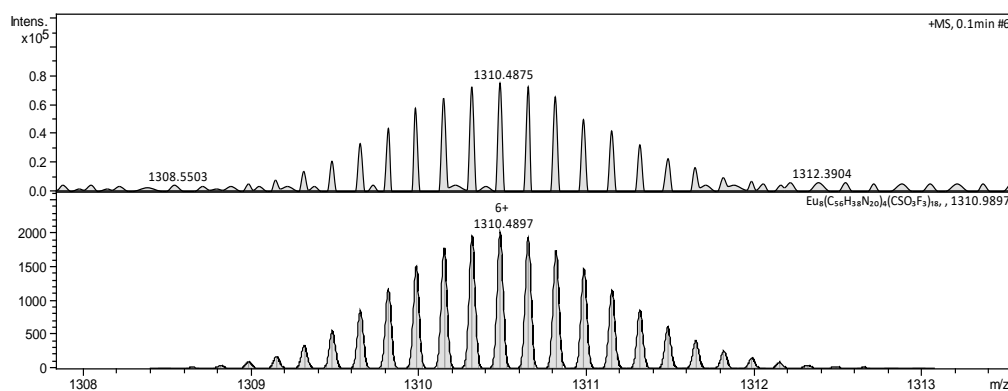

**Figure S33.** ESI-TOF-MS of complex  $\text{Eu}_8\text{L}_4$  with the observed and simulated isotopic patterns of the peaks corresponding to  $[\text{Eu}_8\text{L}_4(\text{OTf})_{18}]^{6+}$ .

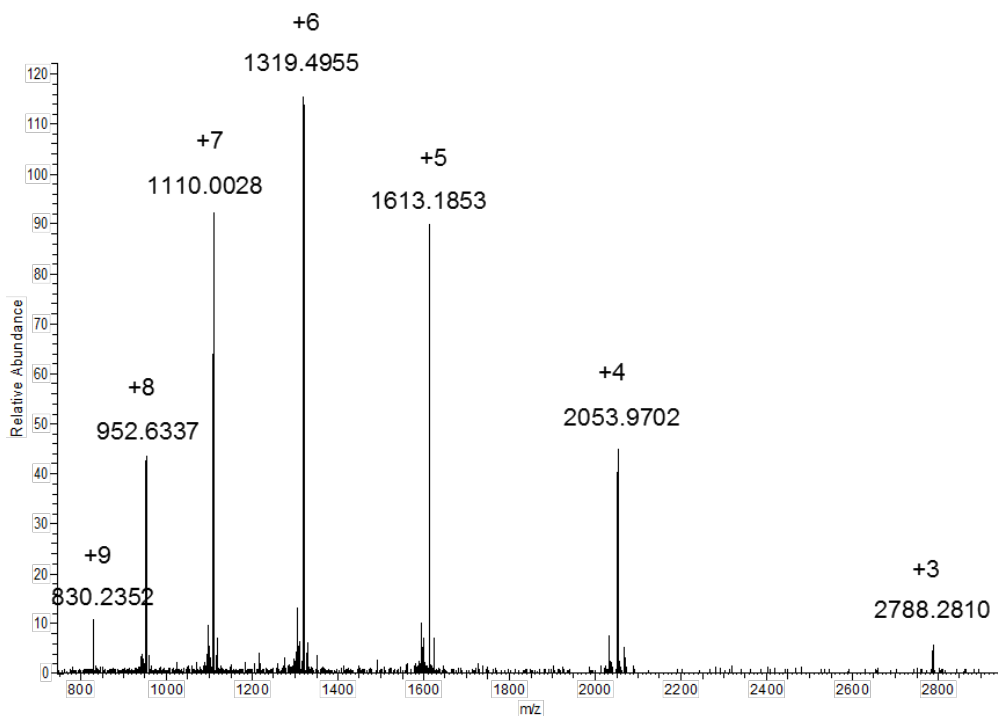

**Figure S34.** ESI-TOF-MS of complex  $\text{Tb}_8\text{L}_4$ .

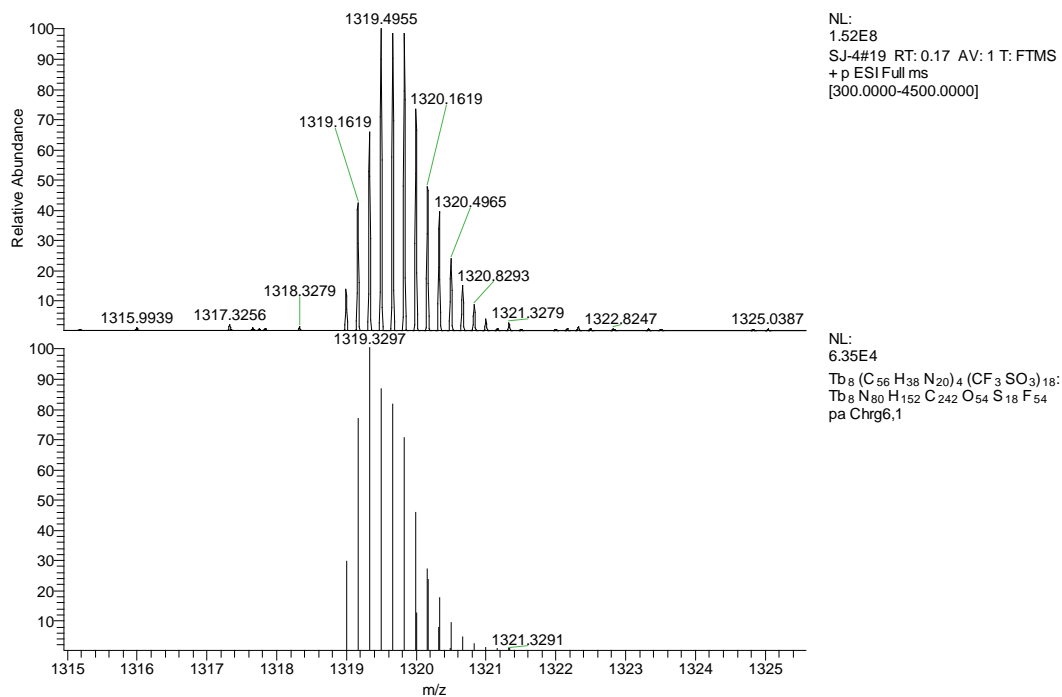

**Figure S35.** ESI-TOF-MS of complex Tb<sub>8</sub>L<sub>4</sub> with the observed and simulated isotopic patterns of the peaks corresponding to [Tb<sub>8</sub>L<sub>4</sub>(OTf)<sub>18</sub>]<sup>6+</sup>.

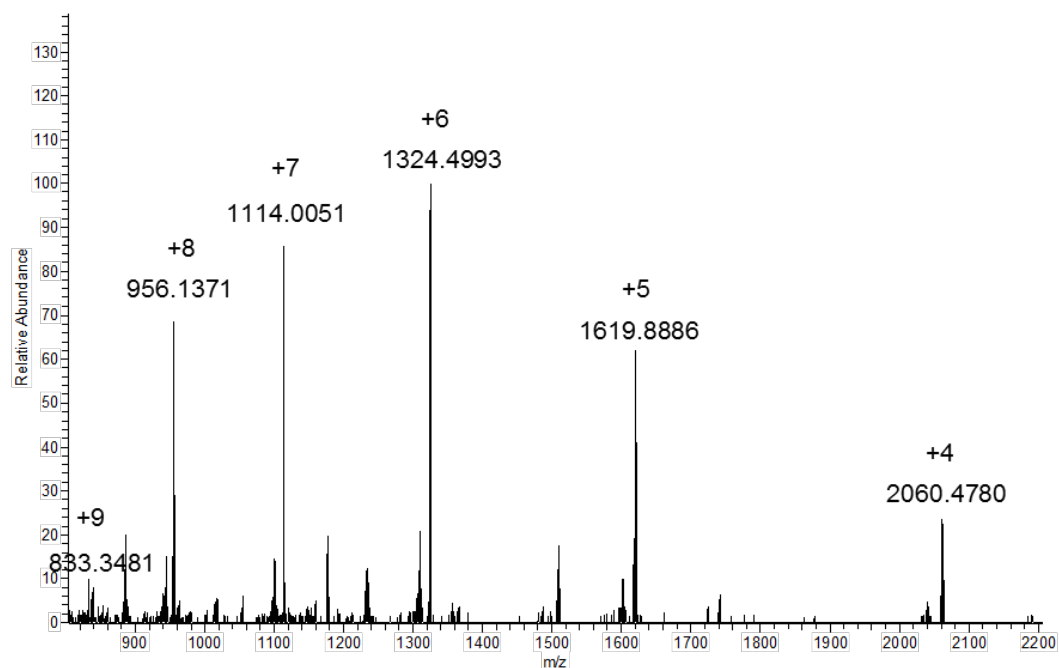

**Figure S36.** ESI-TOF-MS of complex Dy<sub>8</sub>L<sub>4</sub>.

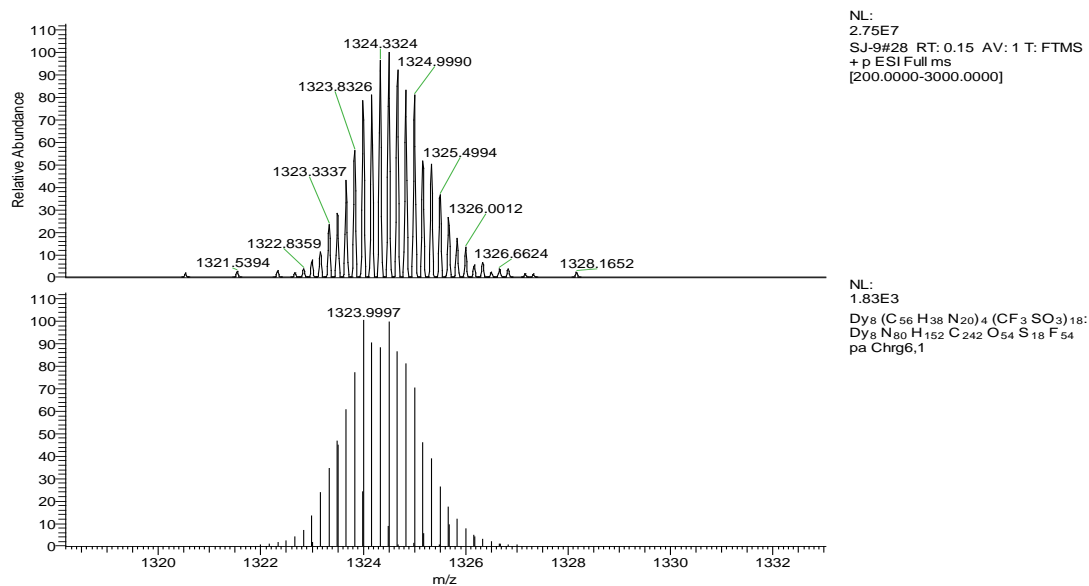

**Figure S37.** ESI-TOF-MS of complex  $\text{Dy}_8\text{L}_4$  with the observed and simulated isotopic patterns of the peaks corresponding to  $[\text{Dy}_8\text{L}_4(\text{OTf})_{18}]^{6+}$ .

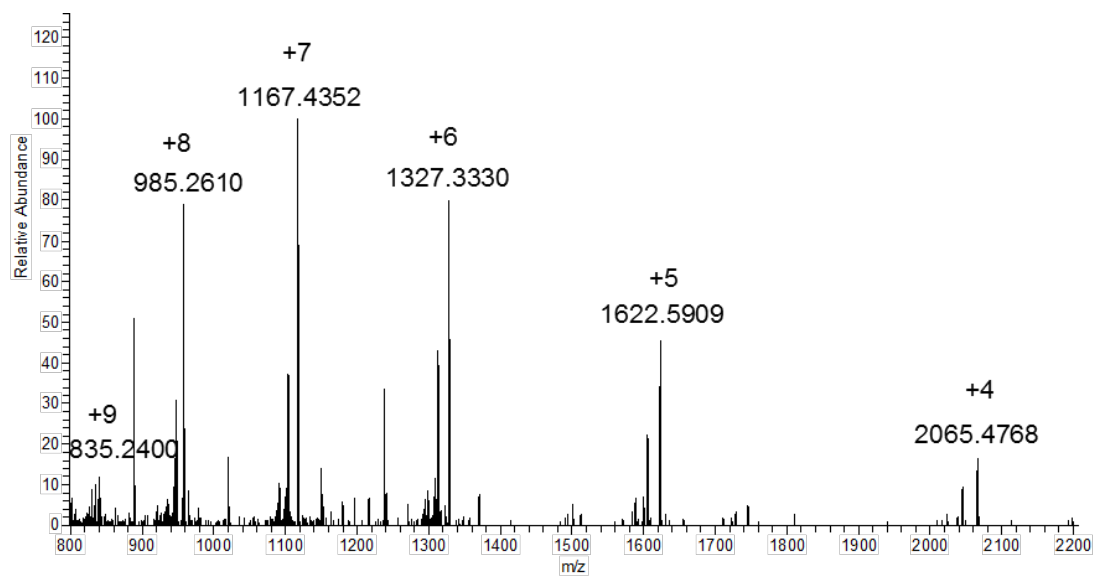

**Figure S38.** ESI-TOF-MS of complex  $\text{Ho}_8\text{L}_4$ .

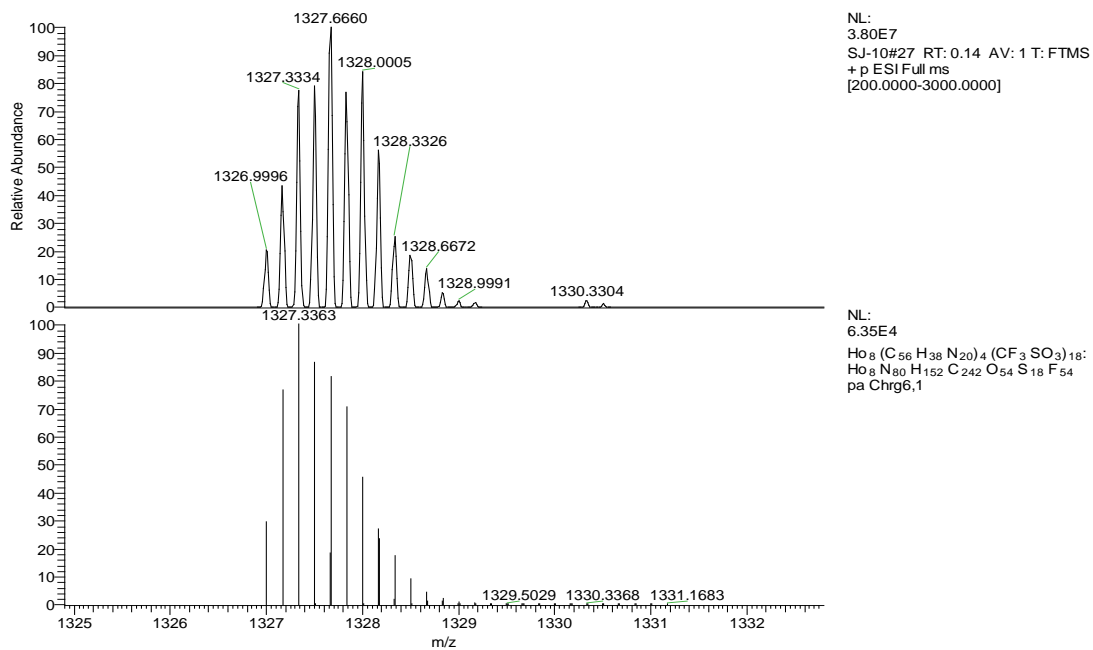

**Figure S39.** ESI-TOF-MS of complex  $\text{Ho}_8\text{L}_4$  with the observed and simulated isotopic patterns of the peaks corresponding to  $[\text{Ho}_8\text{L}_4(\text{OTf})_{18}]^{6+}$ .

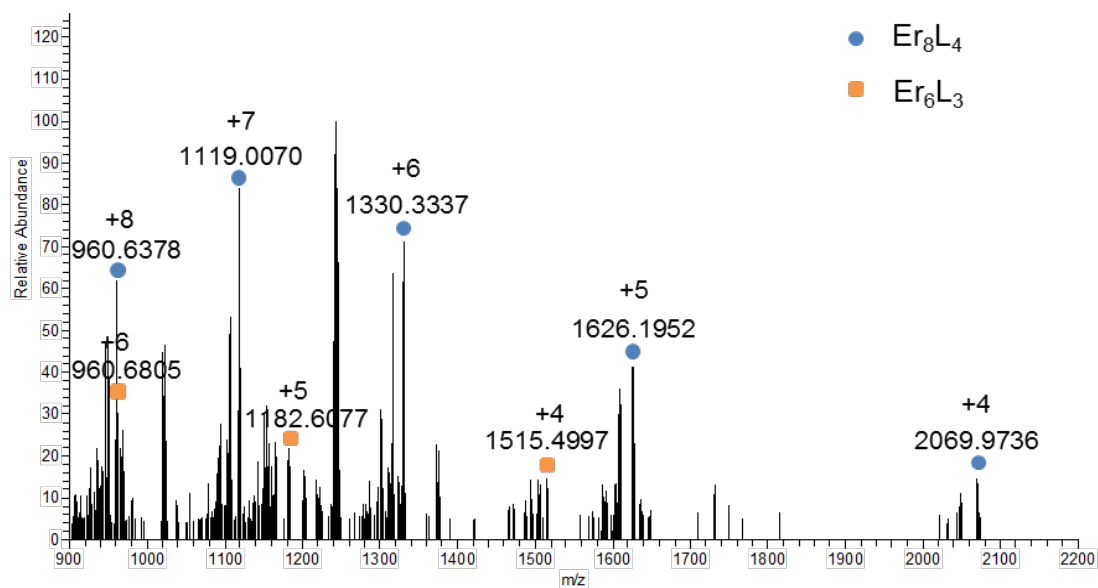

**Figure S40.** ESI-TOF-MS of complex  $\text{Er}_6\text{L}_3$  and  $\text{Er}_8\text{L}_4$ .

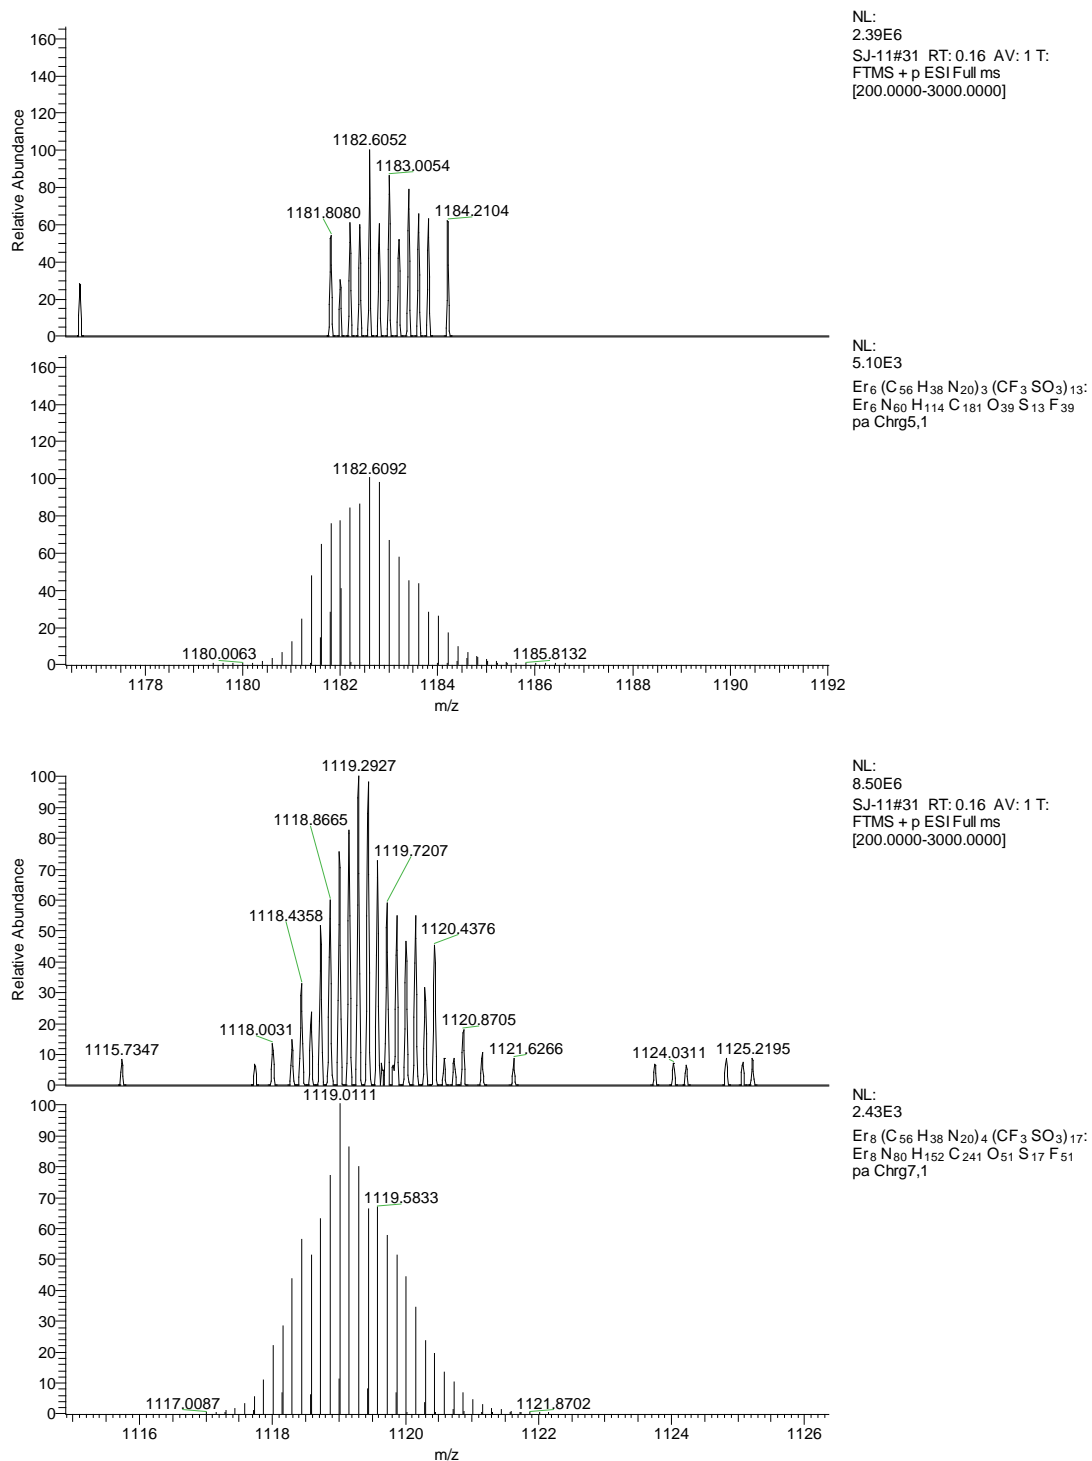

**Figure S41.** ESI-TOF-MS of complex Er<sub>6</sub>L<sub>3</sub> and Er<sub>8</sub>L<sub>4</sub> with the observed and simulated isotopic patterns of the peaks corresponding to [Er<sub>6</sub>L<sub>3</sub>(OTf)<sub>13</sub>]<sup>5+</sup> and [Er<sub>8</sub>L<sub>4</sub>(OTf)<sub>17</sub>]<sup>7+</sup>.

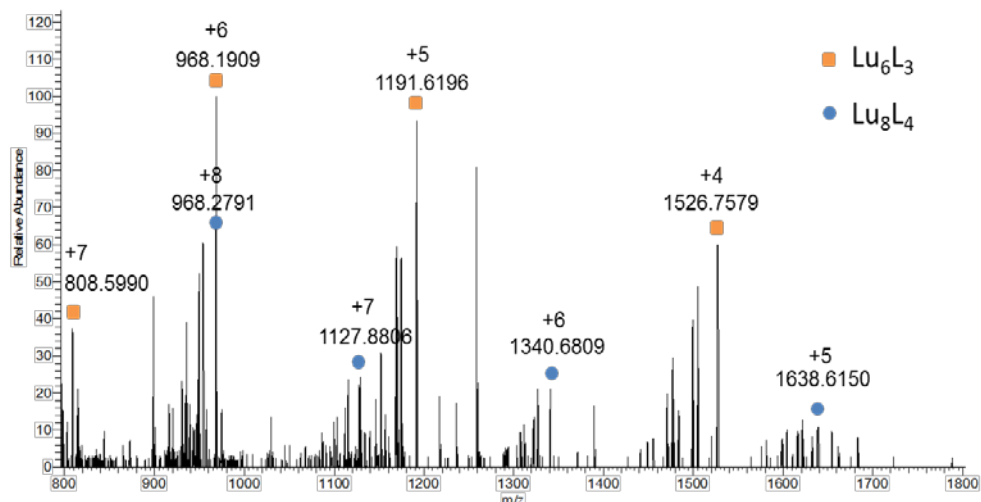

**Figure S42.** ESI-TOF-MS of complex  $\text{Lu}_6\text{L}_3$  and  $\text{Lu}_8\text{L}_4$ .

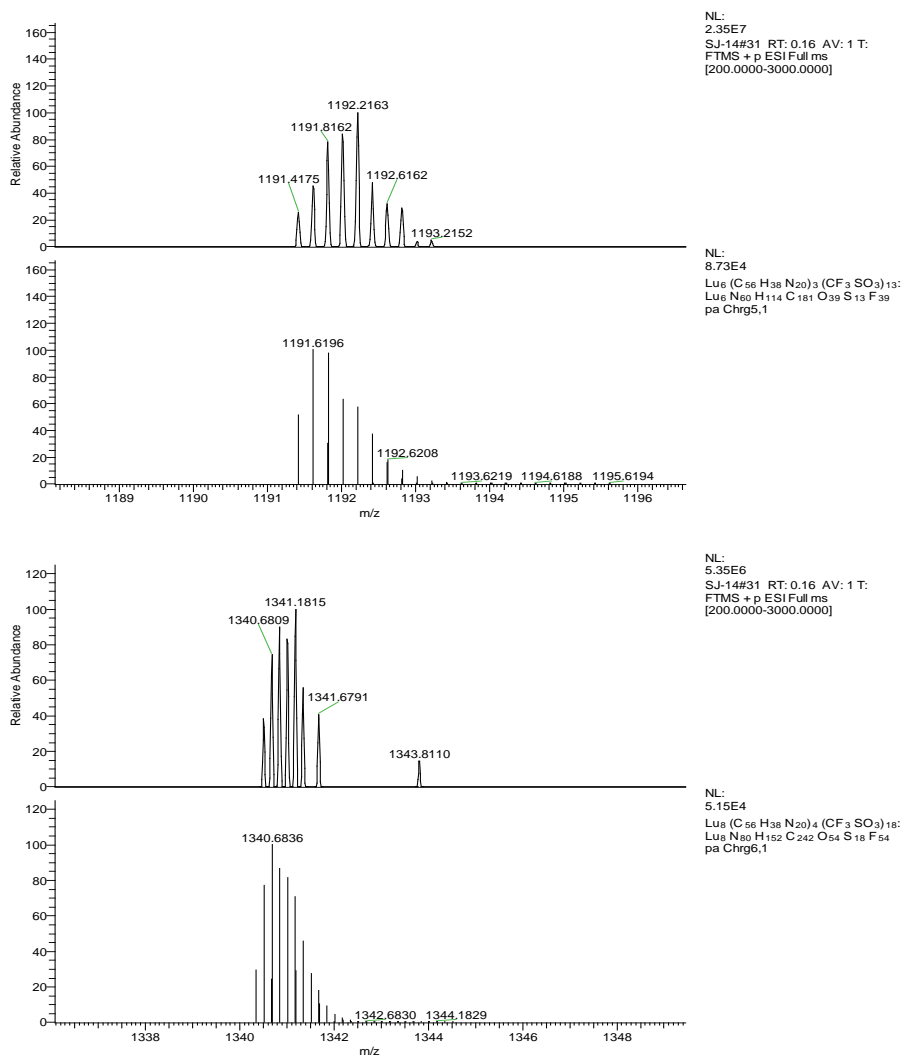

**Figure S43.** ESI-TOF-MS of complex  $\text{Lu}_6\text{L}_3$  and  $\text{Lu}_8\text{L}_4$  with the observed and simulated isotopic patterns of the peaks corresponding to  $[\text{Lu}_6\text{L}_3(\text{OTf})_{13}]^{5+}$  (top) and  $[\text{Lu}_8\text{L}_4(\text{OTf})_{18}]^{6+}$  (bottom), respectively.

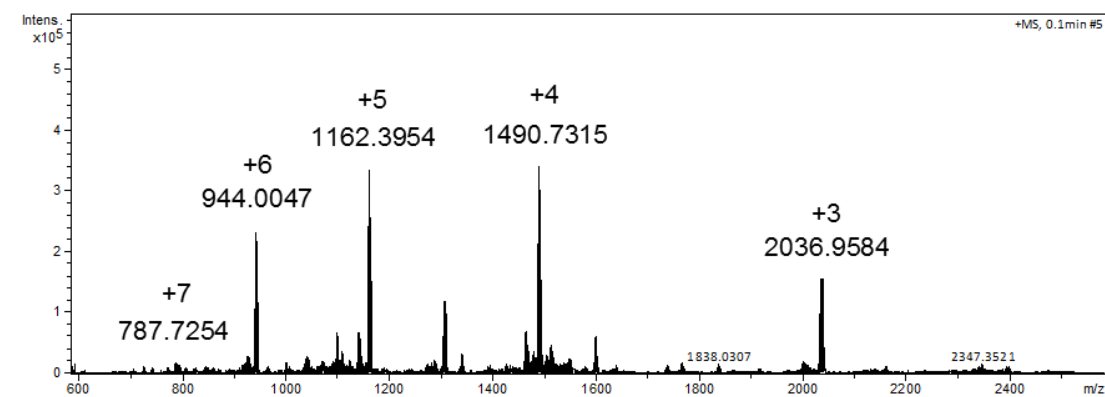

**Figure S44.** ESI-TOF-MS of complex  $\text{Sm}_6\text{L}_3$ .

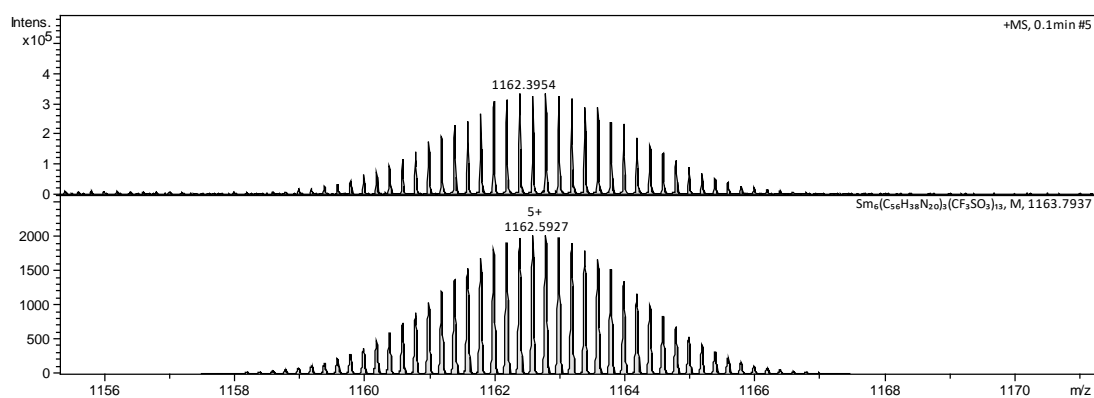

**Figure S45.** ESI-TOF-MS of complex  $\text{Sm}_6\text{L}_3$  with the observed and simulated isotopic patterns of the peaks corresponding to  $[\text{Sm}_6\text{L}_3(\text{OTf})_{13}]^{5+}$ .

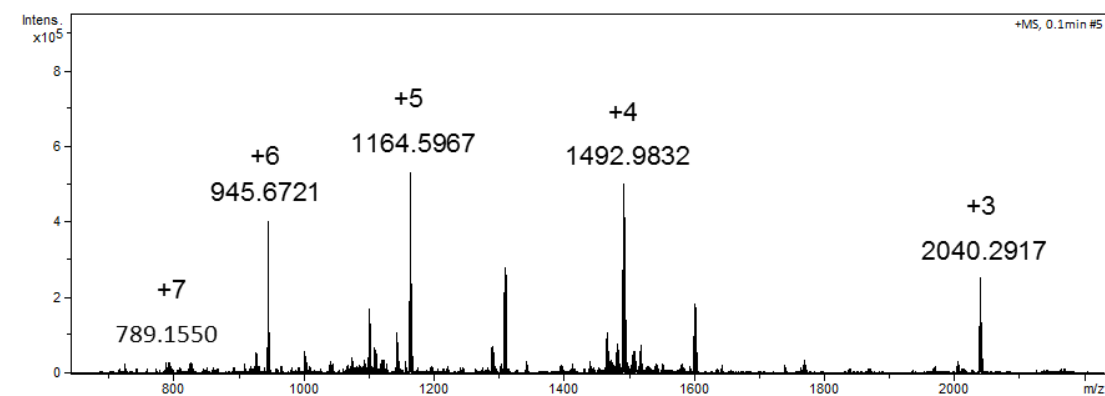

**Figure S46.** ESI-TOF-MS of complex  $\text{Eu}_6\text{L}_3$ .

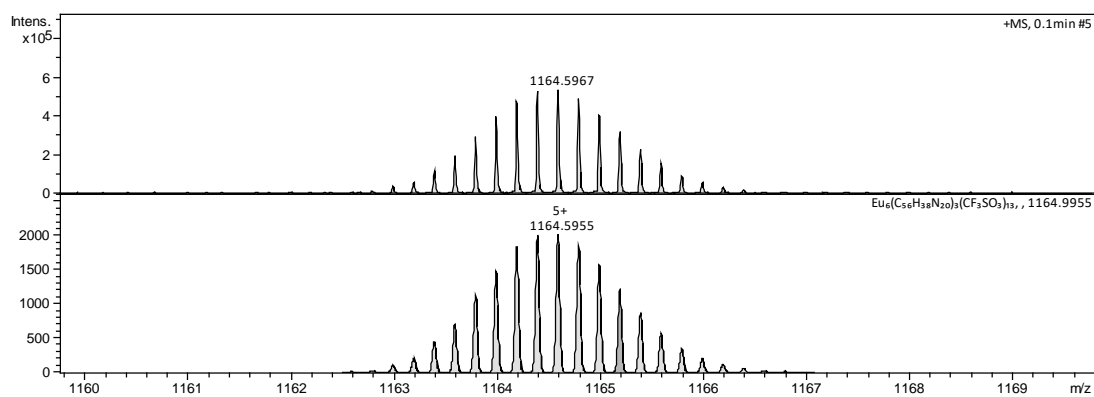

**Figure S47.** ESI-TOF-MS of complex  $\text{Eu}_6\text{L}_3$  with the observed and simulated isotopic patterns of the peaks corresponding to  $[\text{Eu}_6\text{L}_3(\text{OTf})_{13}]^{5+}$ .

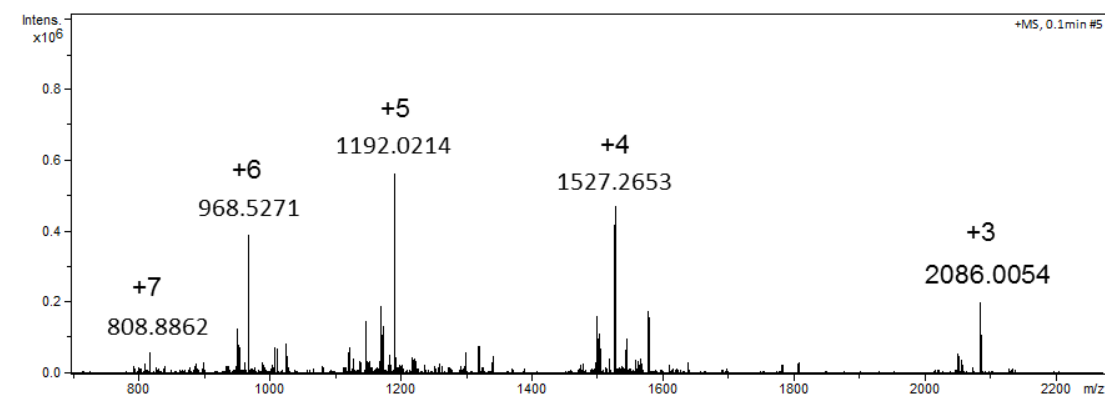

**Figure S48.** ESI-TOF-MS of complex  $\text{Lu}_6\text{L}_3$ .

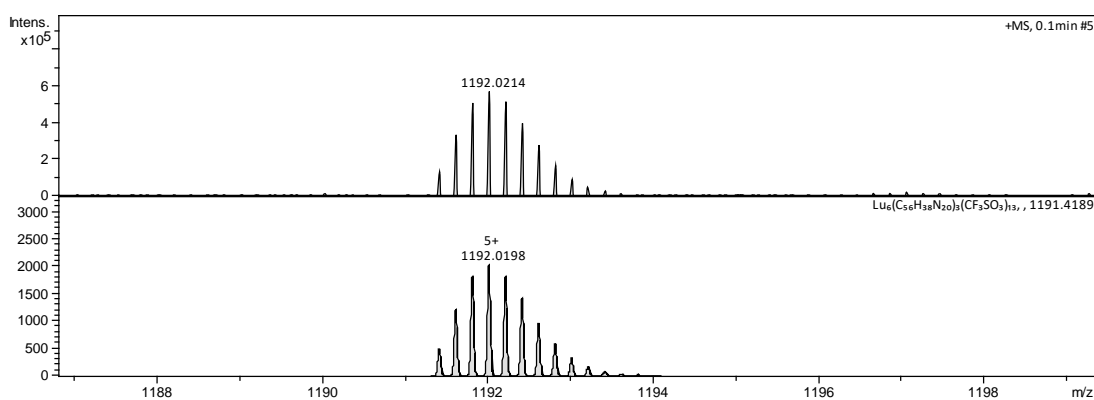

**Figure S49.** ESI-TOF-MS of complex  $\text{Lu}_6\text{L}_3$  with the observed and simulated isotopic patterns of the peaks corresponding to  $[\text{Lu}_6\text{L}_3(\text{OTf})_{13}]^{5+}$ .



### 3. Single crystal X-ray diffraction studies

#### 3.1 Crystal studies

Suitable single crystals of  $\text{La}_4\text{L}_2$  were obtained by slow vapor diffusion of  $\text{Et}_2\text{O}$  into the acetonitrile solution of complexes at room temperature in a week. Single crystals of  $\text{Sm}_8\text{L}_4$  and  $\text{Tb}_8\text{L}_4$  were obtained by slow vapor diffusion THF into the acetonitrile solution of complexes at room temperature in two week. Single crystals of  $\text{Ho}_8\text{L}_4$  were obtained by slow vapor diffusion EA into the acetonitrile solution of complexes at room temperature in two week. The X-ray diffraction for the crystals of  $\text{La}_4\text{L}_2$  and  $\text{Sm}_8\text{L}_4$  were carried out on micro-focus metal jet diffractometer using Ga  $K\alpha$  radiation ( $\lambda = 1.3405 \text{ \AA}$ ). The X-ray diffraction for the crystals of  $\text{Tb}_8\text{L}_4$  and  $\text{Ho}_8\text{L}_4$  were carried out on Bruker D8 VENTURE photon II diffractometer with  $\text{I}\mu\text{s}$  3.0 micro focus X-ray source using Mo  $K\alpha$  radiation ( $\lambda = 0.71073 \text{ \AA}$ ). All the collected diffraction data reductions were performed with the APEX-III software or the CrysAlisPro package. All structures were solved by direct methods and refined by full-matrix least-squares on F2 with anisotropic displacement using the Olex2 software package.<sup>2</sup> Solvent molecules and a portion of counter-ions in the unit cell were highly disordered and could not be reasonably located. These residual electron intensities were removed by PLATON/SQUEEZE routine.<sup>3</sup> Details on crystal data collection and refinement were summarized in Table S1–S2.

Crystallographic data for  $\text{La}_4\text{L}_2$ : Cubic space group  $P2_1/n$ ,  $a = 28.7537(6) \text{ \AA}$ ,  $b = 29.1048(16) \text{ \AA}$ ,  $c = 36.8307(10) \text{ \AA}$ ,  $\alpha = \gamma = 90^\circ$ ,  $\beta = 95.712(2)^\circ$ ,  $V = 30669 \text{ \AA}^3$ ,  $Z = 4$ ,  $T = 293 \text{ K}$ . Anisotropic least – squares refinement on 18025 independent merged reflections ( $R_{\text{int}} = 0.1324$ ), converged at residual  $wR_2 = 0.2798$  for all data; residual  $R_1 = 0.0975$  for 13461 observed data [ $I > 2\sigma(I)$ ], and goodness of fit (GOF) = 1.155.

Crystallographic data for  $\text{Sm}_8\text{L}_4$ : Cubic space group  $I4/m$ ,  $a = b = 33.1015(4)$ ,  $c = 52.4591(12) \text{ \AA}$ ,  $\alpha = \beta = \gamma = 90^\circ$ ,  $V = 57479.9(19) \text{ \AA}^3$ ,  $Z = 4$ ,  $T = 100 \text{ K}$ . Anisotropic least–squares refinement on 9189 independent merged reflections ( $R_{\text{int}} = 0.0504$ ), converged at residual  $wR_2 = 0.2610$  for all data; residual  $R_1 = 0.0923$  for 7754 observed

data [ $I > 2\sigma(I)$ ], and goodness of fit (GOF) = 1.015.

Crystallographic data for Tb<sub>8</sub>L<sub>4</sub>: Cubic space group  $I4/m$ ,  $a = b = 33.1128(5)$ ,  $c = 52.648(2)$  Å,  $\alpha = \beta = \gamma = 90^\circ$ ,  $V = 57726(3)$  Å<sup>3</sup>,  $Z = 4$ ,  $T = 100$  K. Anisotropic least – squares refinement on 8681 independent merged reflections ( $R_{\text{int}} = 0.0650$ ), converged at residual  $wR_2 = 0.2907$  for all data; residual  $R_1 = 0.1120$  for 7195 observed data [ $I > 2\sigma(I)$ ], and goodness of fit (GOF) = 1.056.

Crystallographic data for Ho<sub>8</sub>L<sub>4</sub>: Cubic space group  $I4/m$ ,  $a = b = 33.4347(3)$ ,  $c = 54.6188(10)$  Å,  $\alpha = \beta = \gamma = 90^\circ$ ,  $V = 61057.2(16)$  Å<sup>3</sup>,  $Z = 4$ ,  $T = 279$  K. Anisotropic least – squares refinement on 26422 independent merged reflections ( $R_{\text{int}} = 0.0398$ ), converged at residual  $wR_2 = 0.1783$  for all data; residual  $R_1 = 0.0518$  for 16827 observed data [ $I > 2\sigma(I)$ ], and goodness of fit (GOF) = 0.996.

**Table S1.** Crystallographic data for La<sub>4</sub>L<sub>2</sub> and Sm<sub>8</sub>L<sub>4</sub>.

| Identification code                           | La <sub>4</sub> L <sub>2</sub>                                                                                  | Sm <sub>8</sub> L <sub>4</sub>                                                                                    |
|-----------------------------------------------|-----------------------------------------------------------------------------------------------------------------|-------------------------------------------------------------------------------------------------------------------|
| Empirical formula                             | C <sub>121</sub> H <sub>90</sub> F <sub>27</sub> La <sub>4</sub> N <sub>40</sub> O <sub>34</sub> S <sub>9</sub> | C <sub>256</sub> H <sub>200</sub> F <sub>48</sub> N <sub>80</sub> O <sub>60</sub> S <sub>16</sub> Sm <sub>8</sub> |
| Formula weight                                | 4005.50                                                                                                         | 7984.71                                                                                                           |
| Temperature/K                                 | 293                                                                                                             | 100                                                                                                               |
| Crystal system                                | monoclinic                                                                                                      | tetragonal                                                                                                        |
| Space group                                   | $P2_1/n$                                                                                                        | $I4/m$                                                                                                            |
| $a/\text{Å}$                                  | 28.7537(6)                                                                                                      | 33.1015(4)                                                                                                        |
| $b/\text{Å}$                                  | 29.1048(16)                                                                                                     | 33.1015(4)                                                                                                        |
| $c/\text{Å}$                                  | 36.8307(10)                                                                                                     | 52.4591(12)                                                                                                       |
| $\alpha/^\circ$                               | 90                                                                                                              | 90                                                                                                                |
| $\beta/^\circ$                                | 95.712(2)                                                                                                       | 90                                                                                                                |
| $\gamma/^\circ$                               | 90                                                                                                              | 90                                                                                                                |
| Volume/Å <sup>3</sup>                         | 30669(2)                                                                                                        | 57479.9(19)                                                                                                       |
| $Z$                                           | 4                                                                                                               | 4                                                                                                                 |
| $\rho_{\text{calc}}/\text{cm}^3$              | 0.867                                                                                                           | 0.923                                                                                                             |
| $\mu/\text{mm}^{-1}$                          | 5.316                                                                                                           | 4.939                                                                                                             |
| $F(000)$                                      | 7932.0                                                                                                          | 15840.0                                                                                                           |
| Crystal size/mm <sup>3</sup>                  | 0.35 × 0.23 × 0.16                                                                                              | 0.26 × 0.23 × 0.22                                                                                                |
| Radiation                                     | Cu K $\alpha$ ( $\lambda = 1.54184$ )                                                                           | Ga K $\alpha$ ( $\lambda = 1.3405$ )                                                                              |
| $2\Theta$ range for data collection/ $^\circ$ | 4.822 to 79.942                                                                                                 | 4.97 to 69.898                                                                                                    |
| Index ranges                                  | $-23 \leq h \leq 22$ , $-24 \leq k \leq 24$ ,<br>$-25 \leq l \leq 30$                                           | $-28 \leq h \leq 27$ , $-20 \leq k \leq 28$ ,<br>$-44 \leq l \leq 44$                                             |

|                                                       |                                                                   |                                                                  |
|-------------------------------------------------------|-------------------------------------------------------------------|------------------------------------------------------------------|
| <b>Reflections collected</b>                          | 76296                                                             | 37759                                                            |
| <b>Independent reflections</b>                        | 18025<br>[R <sub>int</sub> = 0.1324, R <sub>sigma</sub> = 0.0789] | 9189<br>[R <sub>int</sub> = 0.0504, R <sub>sigma</sub> = 0.0312] |
| <b>Data/restraints/parameters</b>                     | 18025/2451/2146                                                   | 9189/3007/1102                                                   |
| <b>Goodness-of-fit on F<sup>2</sup></b>               | 1.155                                                             | 1.015                                                            |
| <b>Final R indexes [I ≥ 2σ (I)]</b>                   | R <sub>1</sub> = 0.0975, wR <sub>2</sub> = 0.2619                 | R <sub>1</sub> = 0.0923, wR <sub>2</sub> = 0.2461                |
| <b>Final R indexes [all data]</b>                     | R <sub>1</sub> = 0.1119, wR <sub>2</sub> = 0.2798                 | R <sub>1</sub> = 0.1037, wR <sub>2</sub> = 0.2610                |
| <b>Largest diff. peak/hole / e<br/>Å<sup>-3</sup></b> | 0.90/-1.09                                                        | 1.49/-0.86                                                       |

**Table S2.** Crystallographic data for Tb<sub>8</sub>L<sub>4</sub> and Ho<sub>8</sub>L<sub>4</sub>.

| <b>Identification code</b>             | Tb <sub>8</sub> L <sub>4</sub>                                                                                    | Ho <sub>8</sub> L <sub>4</sub>                                                                                    |
|----------------------------------------|-------------------------------------------------------------------------------------------------------------------|-------------------------------------------------------------------------------------------------------------------|
| <b>Empirical formula</b>               | C <sub>256</sub> H <sub>200</sub> F <sub>48</sub> N <sub>80</sub> O <sub>60</sub> S <sub>16</sub> Tb <sub>8</sub> | C <sub>240</sub> H <sub>176</sub> F <sub>48</sub> Ho <sub>8</sub> N <sub>80</sub> O <sub>60</sub> S <sub>16</sub> |
| <b>Formula weight</b>                  | 8053.27                                                                                                           | 7885.00                                                                                                           |
| <b>Temperature/K</b>                   | 100                                                                                                               | 279                                                                                                               |
| <b>Crystal system</b>                  | tetragonal                                                                                                        | tetragonal                                                                                                        |
| <b>Space group</b>                     | <i>I4/m</i>                                                                                                       | <i>I4/m</i>                                                                                                       |
| <b>a/Å</b>                             | 33.1128(5)                                                                                                        | 33.4347(3)                                                                                                        |
| <b>b/Å</b>                             | 33.1128(5)                                                                                                        | 33.4347(3)                                                                                                        |
| <b>c/Å</b>                             | 52.648(2)                                                                                                         | 54.6188(10)                                                                                                       |
| <b>α/°</b>                             | 90                                                                                                                | 90                                                                                                                |
| <b>β/°</b>                             | 90                                                                                                                | 90                                                                                                                |
| <b>γ/°</b>                             | 90                                                                                                                | 90                                                                                                                |
| <b>Volume/Å<sup>3</sup></b>            | 57726(3)                                                                                                          | 61057.2(16)                                                                                                       |
| <b>Z</b>                               | 4                                                                                                                 | 4                                                                                                                 |
| <b>ρ<sub>calc</sub>/cm<sup>3</sup></b> | 0.927                                                                                                             | 0.858                                                                                                             |
| <b>μ/mm<sup>-1</sup></b>               | 1.086                                                                                                             | 1.136                                                                                                             |
| <b>F(000)</b>                          | 15936.0                                                                                                           | 15520.0                                                                                                           |
| <b>Crystal size/mm<sup>3</sup></b>     | 0.2 × 0.15 × 0.15                                                                                                 | 0.31 × 0.22 × 0.22                                                                                                |
| <b>Radiation</b>                       | Mo Kα (λ = 0.71073)                                                                                               | Mo Kα (λ = 0.71073)                                                                                               |
| <b>2θ range for data collection/°</b>  | 3.77 to 34.45                                                                                                     | 3.524 to 50.054                                                                                                   |
| <b>Index ranges</b>                    | -26 ≤ h ≤ 27, -26 ≤ k ≤ 27,<br>-43 ≤ l ≤ 43                                                                       | -39 ≤ h ≤ 39, -39 ≤ k ≤ 36,<br>-65 ≤ l ≤ 62                                                                       |
| <b>Reflections collected</b>           | 38394                                                                                                             | 88098                                                                                                             |
| <b>Independent reflections</b>         | 8681 [R <sub>int</sub> = 0.0650,<br>R <sub>sigma</sub> = 0.0341]                                                  | 26422 [R <sub>int</sub> = 0.0398,<br>R <sub>sigma</sub> = 0.0425]                                                 |
| <b>Data/restraints/parameters</b>      | 8681/2722/1040                                                                                                    | 26422/3840/1020                                                                                                   |

|                                                   |                                                   |                                                   |
|---------------------------------------------------|---------------------------------------------------|---------------------------------------------------|
| <b>Goodness-of-fit on F<sup>2</sup></b>           | 1.056                                             | 0.996                                             |
| <b>Final R indexes [I&gt;=2σ (I)]</b>             | R <sub>1</sub> = 0.1120, wR <sub>2</sub> = 0.2756 | R <sub>1</sub> = 0.0518, wR <sub>2</sub> = 0.1565 |
| <b>Final R indexes [all data]</b>                 | R <sub>1</sub> = 0.1294, wR <sub>2</sub> = 0.2907 | R <sub>1</sub> = 0.0799, wR <sub>2</sub> = 0.1783 |
| <b>Largest diff. peak/hole / e Å<sup>-3</sup></b> | 1.24/-1.27                                        | 1.18/-0.64                                        |

**Table S3.** SHAPE Analysis for the La<sub>4</sub>L<sub>2</sub> coordination sphere.

|     | DP-10            | EPY-10          | OBPY-10         | PPR-10          | PAPR-10         |
|-----|------------------|-----------------|-----------------|-----------------|-----------------|
|     | D <sub>10h</sub> | C <sub>9v</sub> | D <sub>8h</sub> | D <sub>5h</sub> | D <sub>5d</sub> |
| La1 | 33.55514         | 24.34721        | 18.45960        | 10.54960        | 13.19975        |
| La2 | 33.77836         | 24.57340        | 18.55938        | 10.43711        | 13.36656        |
| La3 | 34.12318         | 23.95758        | 18.64400        | 10.83278        | 13.13226        |
| La4 | 33.43324         | 24.05756        | 18.60198        | 10.73882        | 13.42397        |
|     | JBCCU-10         | JBCSAPR-10      | JMBIC-10        | JATDI-10        | JSPC-10         |
|     | D <sub>4h</sub>  | D <sub>4d</sub> | C <sub>2v</sub> | C <sub>3v</sub> | C <sub>2v</sub> |
| La1 | 9.36561          | 1.92703         | 8.38762         | 18.58957        | 2.64771         |
| La2 | 9.79330          | 2.09502         | 8.66815         | 18.02310        | 2.61702         |
| La3 | 9.51433          | 2.08036         | 8.20928         | 17.93841        | 2.64442         |
| La4 | 9.46504          | 1.94334         | 8.68037         | 18.14712        | 2.80262         |
|     | SDD-10           | TD-10           | HD-10           |                 |                 |
|     | D <sub>2</sub>   | C <sub>2v</sub> | D <sub>4h</sub> |                 |                 |
| La1 | 5.94404          | 5.48180         | 8.27688         |                 |                 |
| La2 | 6.42828          | 5.62447         | 8.56720         |                 |                 |
| La3 | 6.40099          | 5.07362         | 8.30166         |                 |                 |
| La4 | 6.24939          | 5.63370         | 8.39848         |                 |                 |

**Table S4.** SHAPE Analysis for the Sm<sub>8</sub>L<sub>4</sub> coordination sphere.

|     | EP-9            | OPY-9           | HBPY-9          | JTC-9           | JCCU-9          |
|-----|-----------------|-----------------|-----------------|-----------------|-----------------|
|     | D <sub>9h</sub> | C <sub>8v</sub> | D <sub>7h</sub> | C <sub>3v</sub> | C <sub>4v</sub> |
| Sm1 | 34.76975        | 23.45528        | 18.88305        | 14.45895        | 10.32630        |
| Sm2 | 34.70755        | 23.30092        | 18.24248        | 14.05970        | 9.82417         |
|     | CCU-9           | JCSAPR-9        | CSAPR-9         | JTCTPR-9        | TCTPR-9         |
|     | C <sub>4v</sub> | C <sub>4v</sub> | C <sub>4v</sub> | D <sub>3h</sub> | D <sub>3h</sub> |
| Sm1 | 8.67011         | 2.05377         | 1.25807         | 2.19146         | 1.13979         |

|     |                 |                 |                |         |         |
|-----|-----------------|-----------------|----------------|---------|---------|
| Sm2 | 8.82192         | 1.63352         | 0.81384        | 2.52308 | 1.40294 |
|     | JTDIC-9         | HH-9            | MFF-9          |         |         |
|     | C <sub>3v</sub> | C <sub>2v</sub> | C <sub>s</sub> |         |         |
| Sm1 | 11.17981        | 11.11199        | 1.85508        |         |         |
| Sm2 | 11.39006        | 10.43420        | 1.26745        |         |         |

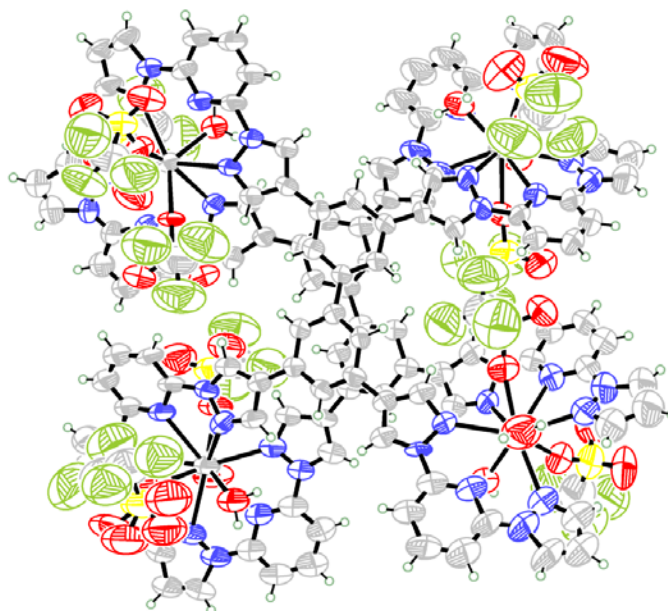

**Figure S50.** Ortep-drawing of the asymmetric unit in the crystal structure of La<sub>4</sub>L<sub>2</sub> at 50% probability level.

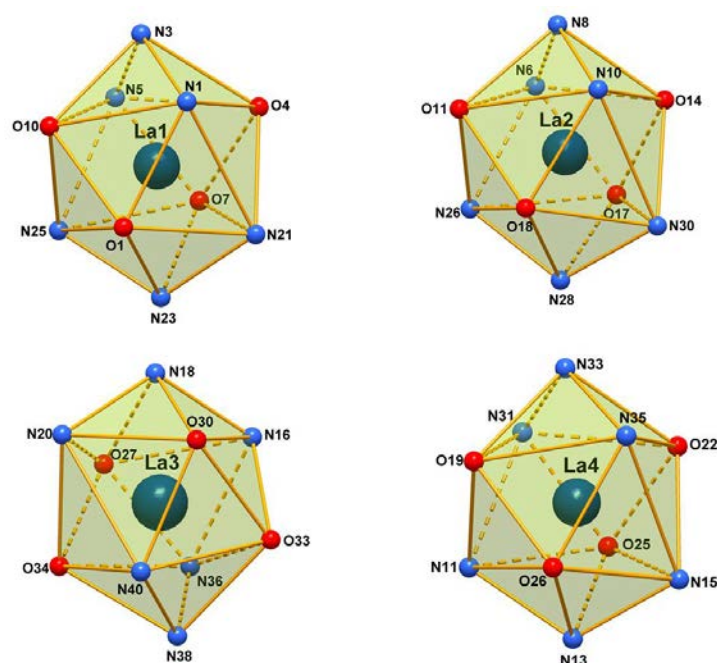

**Figure S51.** The coordination geometry for La1, La2, La3 and La4 in La<sub>4</sub>L<sub>2</sub>.

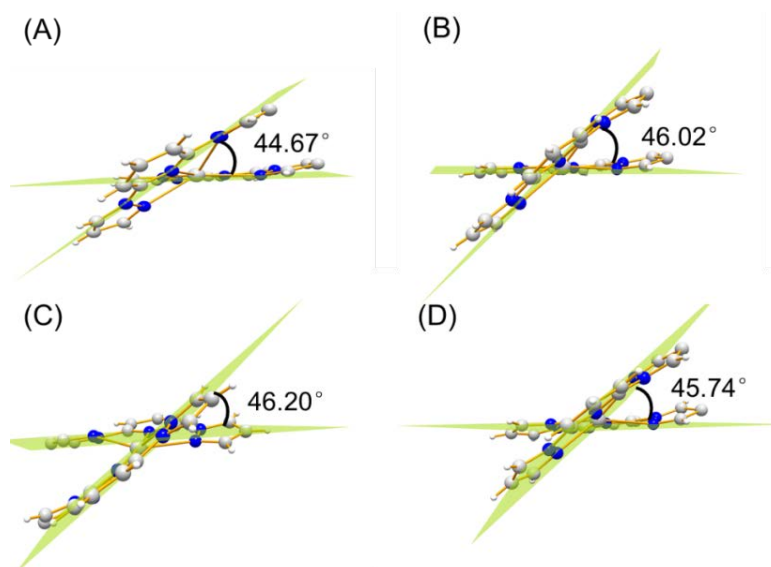

**Figure S52.** The dihedral angles between metal-chelating planes around the  $\text{La}^{3+}$  node in  $\text{La}_4\text{L}_2$ : (A) La1, (B) La2, (C) La3, (D) La4.

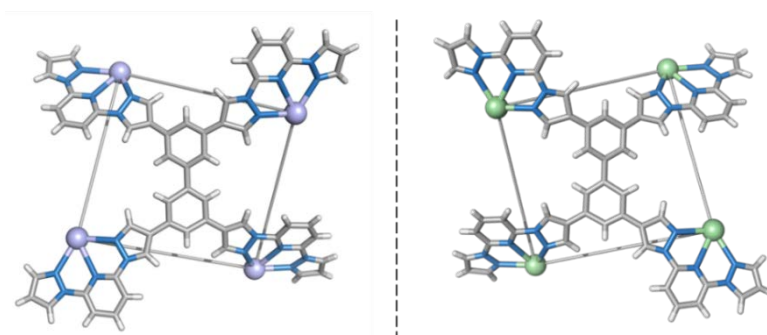

**Figure S53.** Metal-centered configurations of  $\text{La}_4\text{L}_2$  (green:  $\Delta$ ; purple:  $\Lambda$ ).

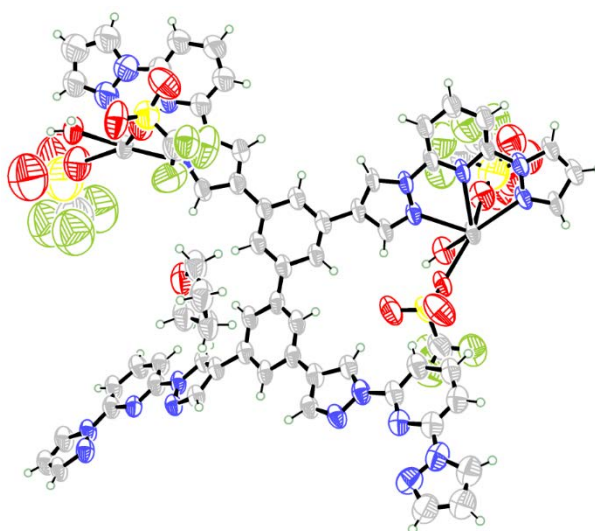

**Figure S54.** Ortep-drawing of the asymmetric unit in the crystal structure of  $\text{Sm}_8\text{L}_4$  at 50% probability level.

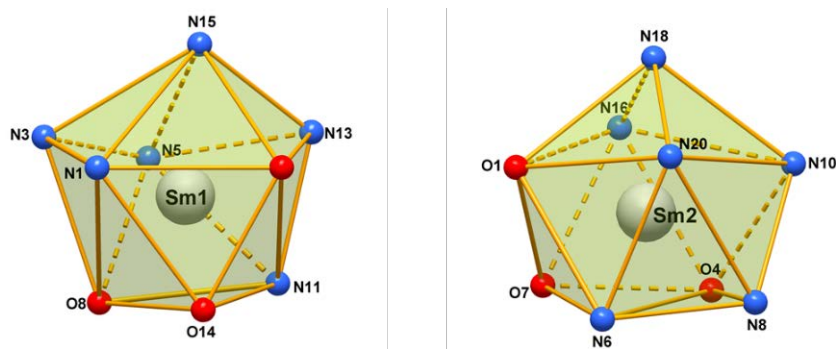

**Figure S55.** The coordination geometry for Sm1 and Sm2 in  $\text{Sm}_8\text{L}_4$ .

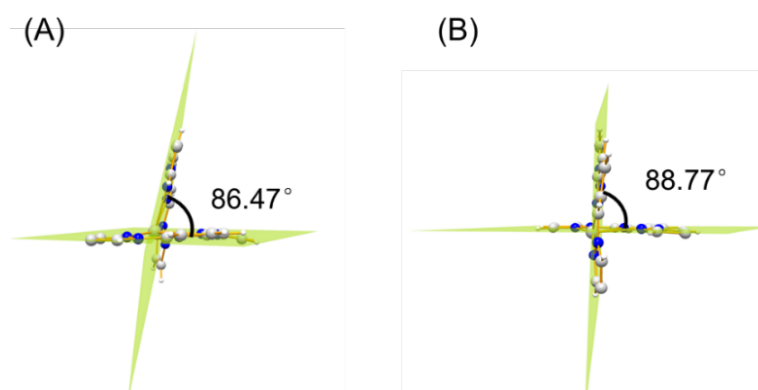

**Figure S56.** The dihedral angles between metal-chelating planes around the  $\text{Sm}^{3+}$  node in  $\text{Sm}_8\text{L}_4$ : (A) Sm1, (B) Sm2.

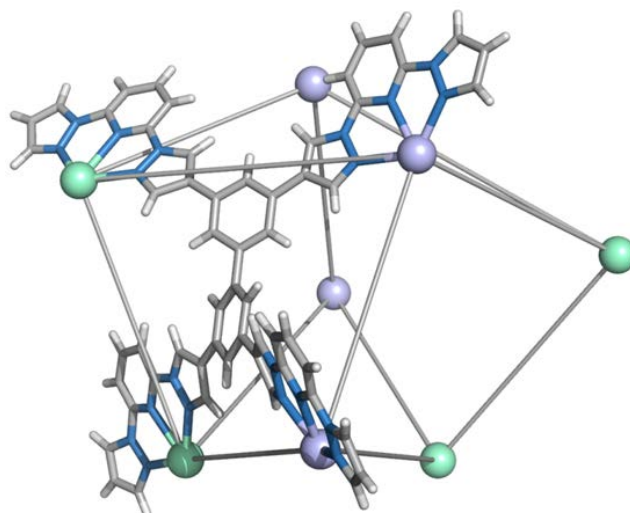

**Figure S57.** Metal-centered configurations of  $\text{Sm}_8\text{L}_4$  (green:  $\Delta$ ; purple:  $\Lambda$ ).

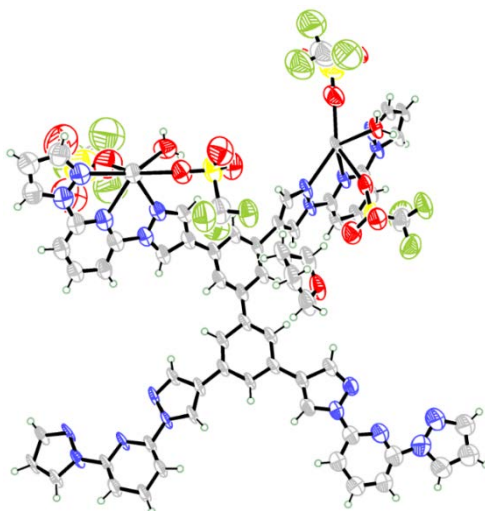

**Figure S58.** Ortep-drawing of the asymmetric unit in the crystal structure of Tb<sub>8</sub>L<sub>4</sub> at 50% probability level.

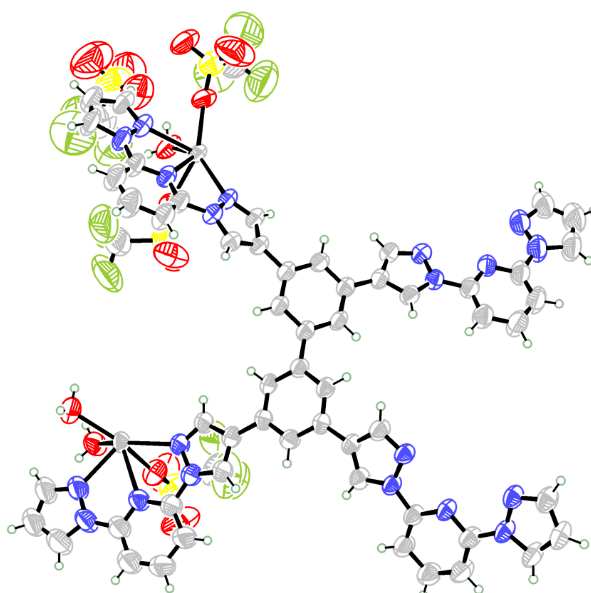

**Figure S59.** Ortep-drawing of the asymmetric unit in the crystal structure of Ho<sub>8</sub>L<sub>4</sub> at 50% probability level.

### 3.2 Volume calculations

Cavity volumes of Sm<sub>8</sub>L<sub>4</sub> was calculated by MoloVol based on their crystal structures after omitting the encapsulated guests.<sup>4</sup> The related parameters were used in the calculations as follow:

Probe mode: one probe



Probe radius: 1.4 Å

Volume: 594.521 Å<sup>3</sup>

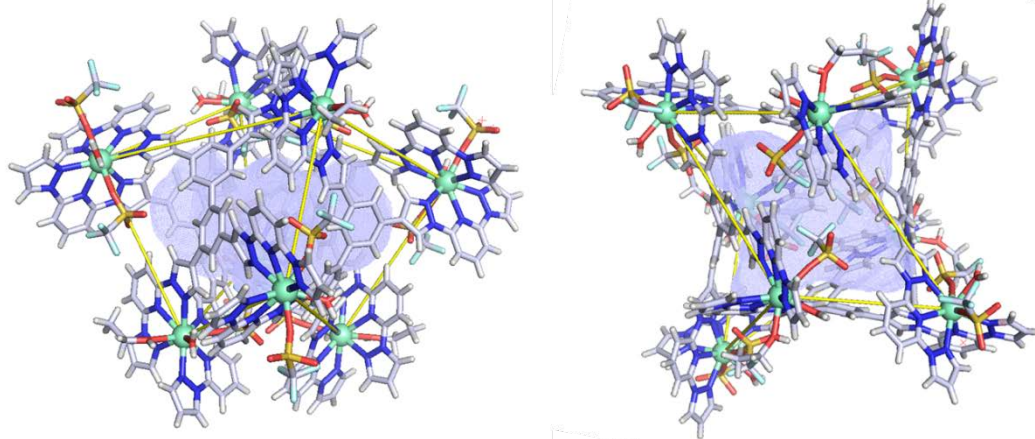

**Figure S60.** The view of calculated cavity volume of Sm<sub>8</sub>L<sub>4</sub>.

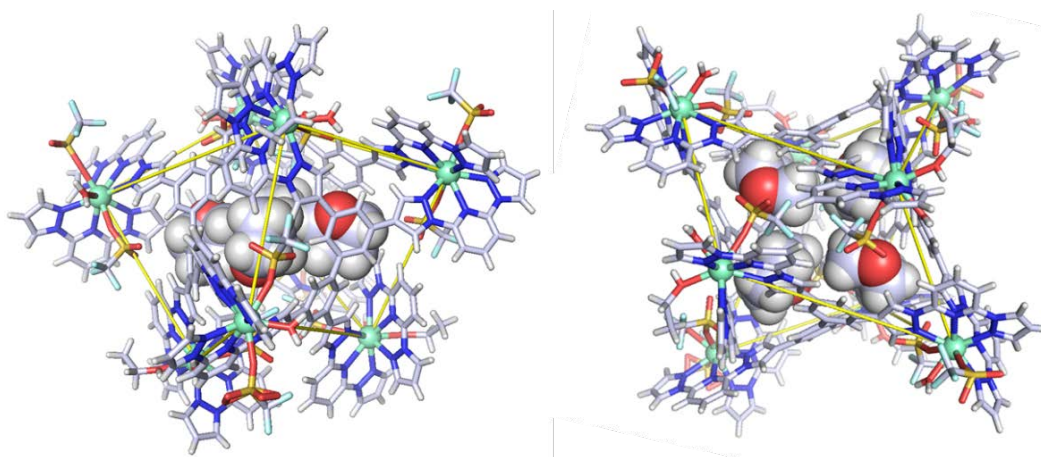

**Figure S61.** Crystal Structure of Sm<sub>8</sub>L<sub>4</sub> Host-guest Complex.

## 4. Host-guest studies

### 4.1 General procedure for host-guest studies

In the process of processing crystal data, it was discovered that four tetrahydrofuran molecules encapsulated in the  $\text{Sm}_8\text{L}_4$  structure. Therefore, an excess of the guest (10 equivalents) was added to  $\text{Sm}_8\text{L}_4$  (0.001 mmol) in  $\text{CD}_3\text{CN}$ , and then heated at  $70^\circ\text{C}$  for 30 minutes to prepare the host-guest complex. To estimate the associate constants, the NMR titration experiments were also carried out and the experimental processes of them were as follows: the guest tetrahydrofuran molecule is diluted in an acetonitrile solution (0.031 M), and then added into the  $\text{Sm}_8\text{L}_4$  host (0.0025 M, 400  $\mu\text{L}$   $\text{CD}_3\text{CN}$ ) to perform the titration experiments.

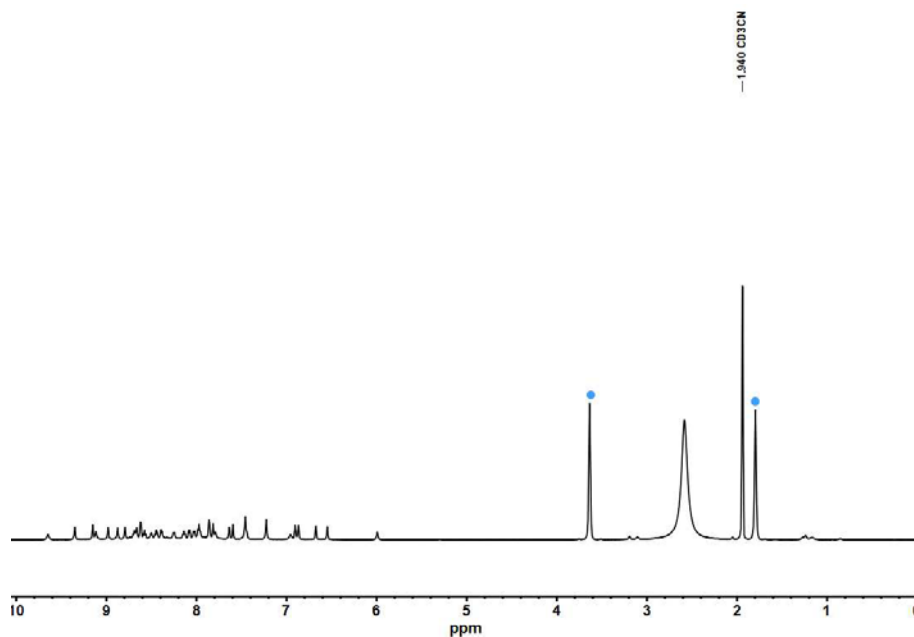

**Figure S62.**  $^1\text{H}$  NMR spectra of  $\text{Sm}_8\text{L}_4$  host-guest complexes. (An excess of guests was added, 400 MHz,  $\text{CD}_3\text{CN}$ , 298 K).

### 4.2 Binding constants estimation

The binding behavior of cage  $\text{Sm}_8\text{L}_4$  for guests have been estimated by  $^1\text{H}$  NMR titrations and fitted with a Hill function:

$$\log \frac{\theta}{1 - \theta} = n \log[G] + n \log[K_a]$$

$\theta$  = saturated ratio

$\theta_i = \Delta\delta_i/\Delta\delta_{\max}$

n: Hill coefficient

[G]=concentration of guest

$K_a$ = apparent association constant

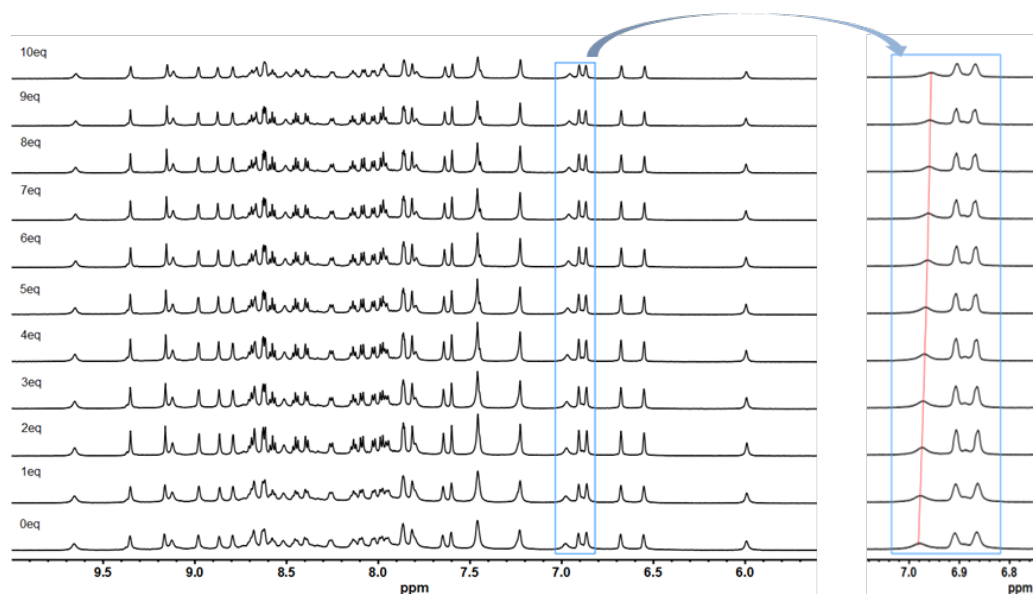

**Figure S63.**  $^1\text{H}$  NMR titration of  $\text{Sm}_8\text{L}_4$  with THF. Conditions:  $c(\text{Sm}_8\text{L}_4) = 0.0025 \text{ M}$ ,  $\text{CD}_3\text{CN}$  ( $400 \mu\text{L}$ ),  $400 \text{ MHz}$ ,  $298 \text{ K}$ .

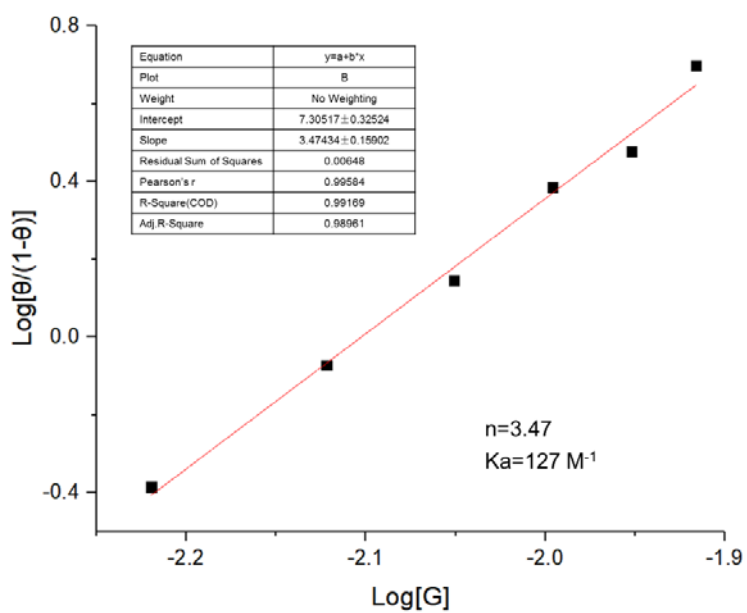

**Figure S64.**  $^1\text{H}$  NMR titration of  $\text{Sm}_8\text{L}_4$  with THF. Conditions:  $c(\text{Sm}_8\text{L}_4) = 0.0025 \text{ M}$ ,  $\text{CD}_3\text{CN}$  ( $400 \mu\text{L}$ ),  $400 \text{ MHz}$ ,  $298 \text{ K}$ .

## 5. The rich conformations of the ligand L

**Table S6.** The nine conformations of ligand L.

| Mode A                                                                            | Mode B                                                                            | Mode C                                                                             |
|-----------------------------------------------------------------------------------|-----------------------------------------------------------------------------------|------------------------------------------------------------------------------------|
| 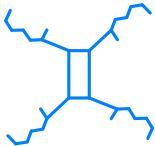 |  |  |
| Mode D                                                                            | Mode E                                                                            | Mode F                                                                             |
|  |  |  |
| Mode G                                                                            | Mode H                                                                            | Mode I                                                                             |
|  |  |  |

## 6. UV-Vis and FL spectra

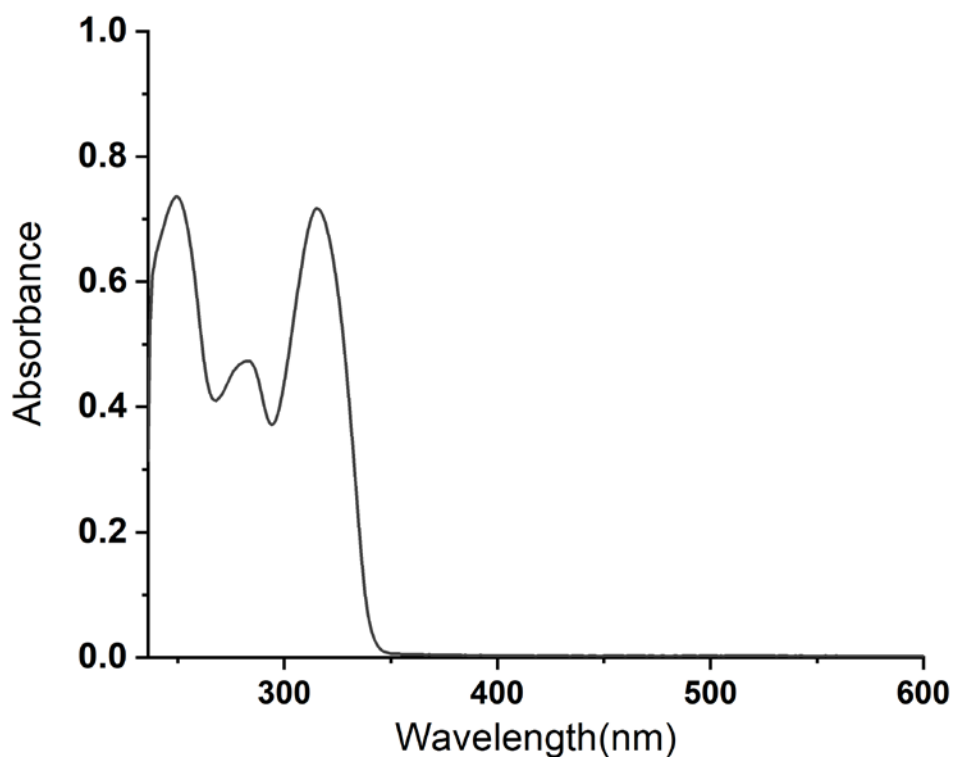

**Figure S65.** UV-vis spectra of **L** ( $c = 1 \times 10^{-5}$  M, CH<sub>3</sub>Cl).

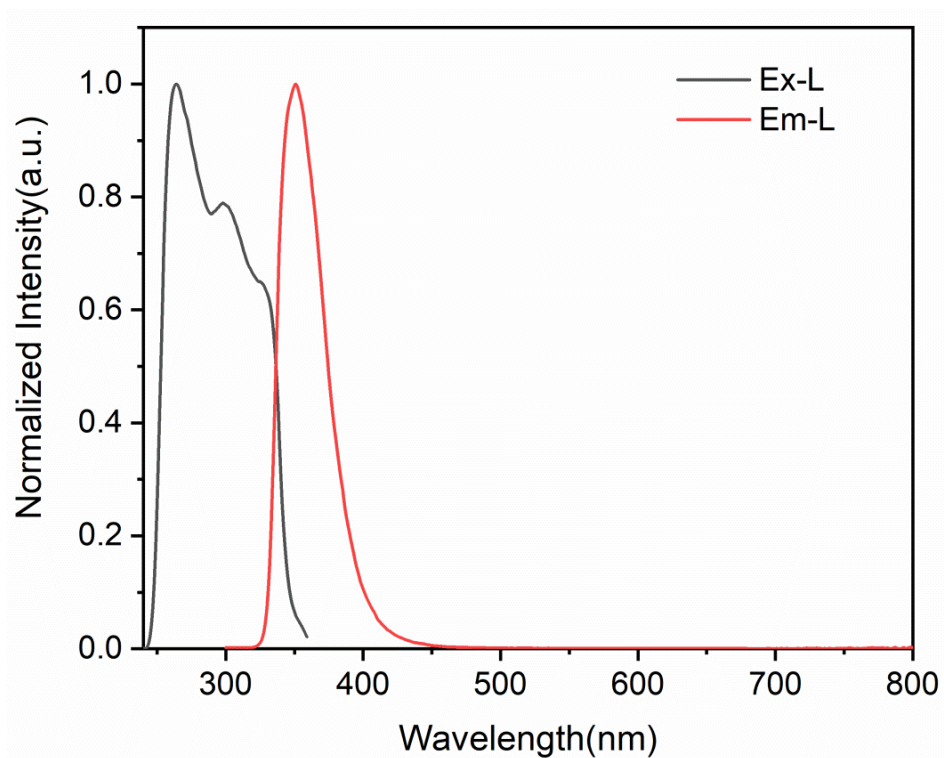

**Figure S66.** Excitation and emission spectra of **L** ( $c = 1 \times 10^{-5}$  M, CH<sub>3</sub>Cl).

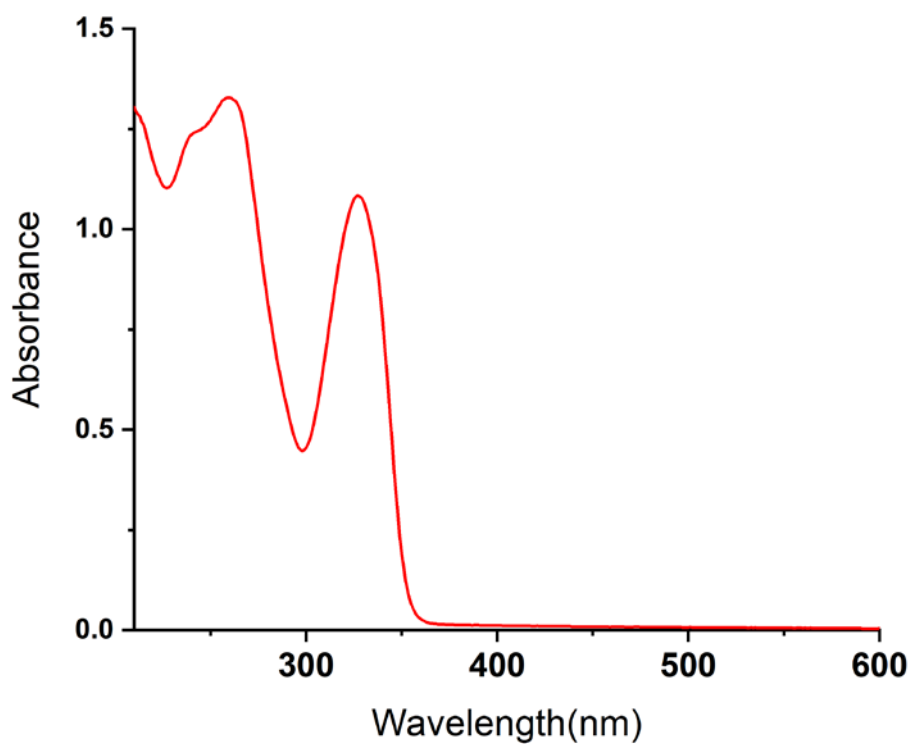

**Figure S67.** UV-vis spectra of  $\text{Tb}_8\text{L}_4$  ( $c = 1 \times 10^{-5}$  M,  $\text{CH}_3\text{CN}$ ).

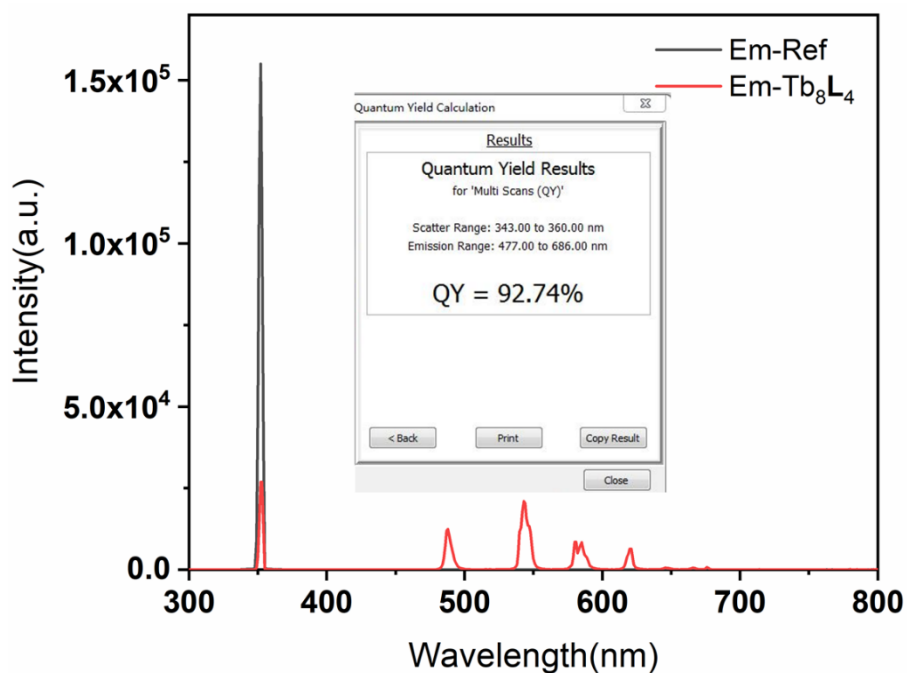

**Figure S68.** The superposition of emission spectra of reference and  $\text{Tb}_8\text{L}_4$  ( $\lambda_{\text{ex}} = 353$  nm,  $c = 1 \times 10^{-5}$  M in  $\text{CH}_3\text{CN}$ ,  $\Phi_{\text{overall}} = 92.74\%$ ).

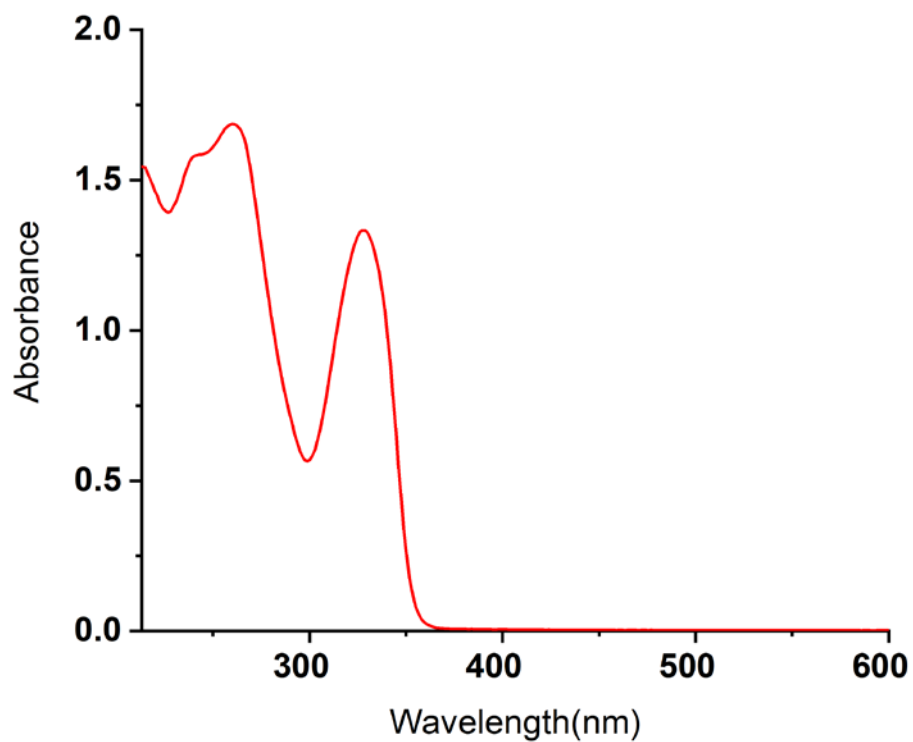

**Figure S69.** UV-vis spectra of  $\text{Sm}_8\text{L}_4$  ( $c = 1 \times 10^{-5}$  M,  $\text{CH}_3\text{CN}$ ).

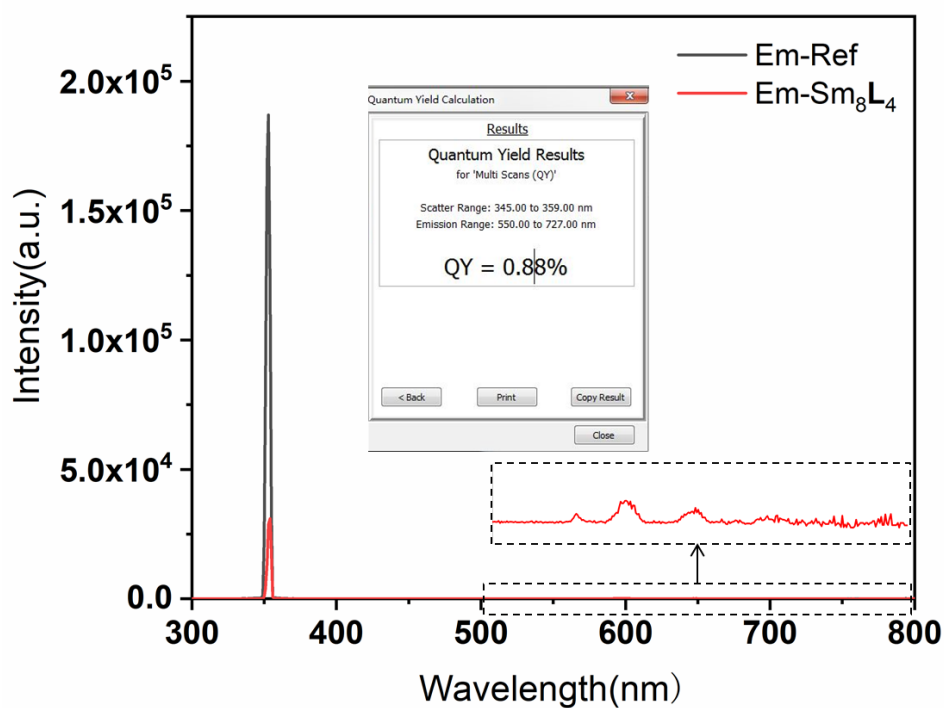

**Figure S70.** The superposition of emission spectra of reference and  $\text{Sm}_8\text{L}_4$  ( $\lambda_{\text{ex}} = 354$  nm,  $c = 1 \times 10^{-5}$  M in  $\text{CH}_3\text{CN}$ ,  $\Phi_{\text{overall}} = 0.88\%$ ).

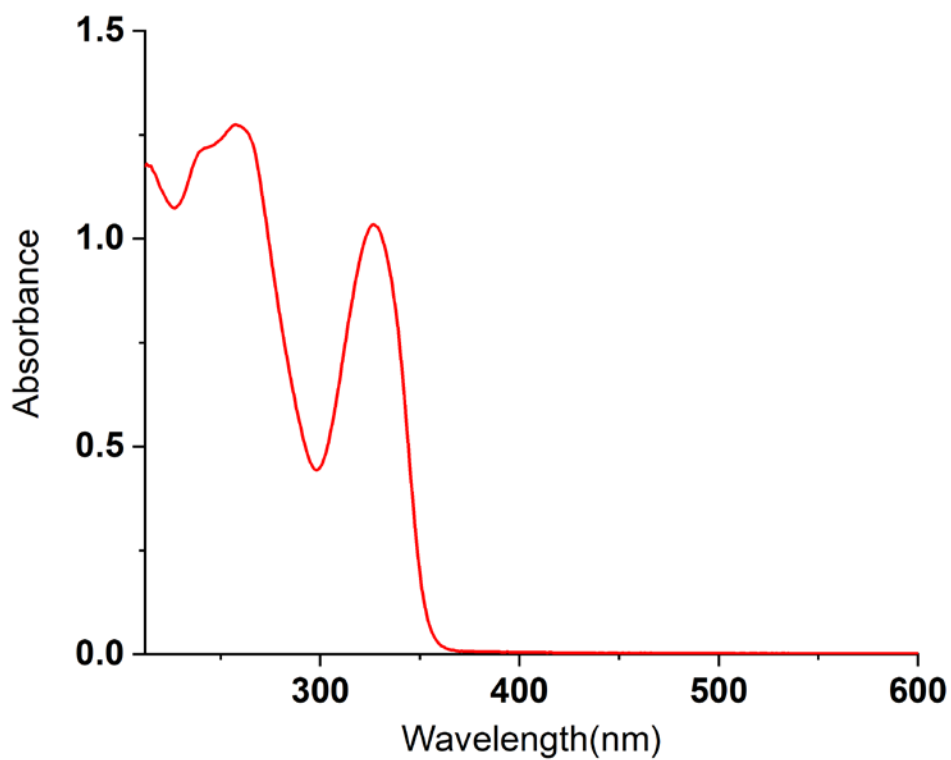

**Figure S71.** UV-vis spectra of  $\text{Dy}_8\text{L}_4$  ( $c = 1 \times 10^{-5}$  M,  $\text{CH}_3\text{CN}$ ).

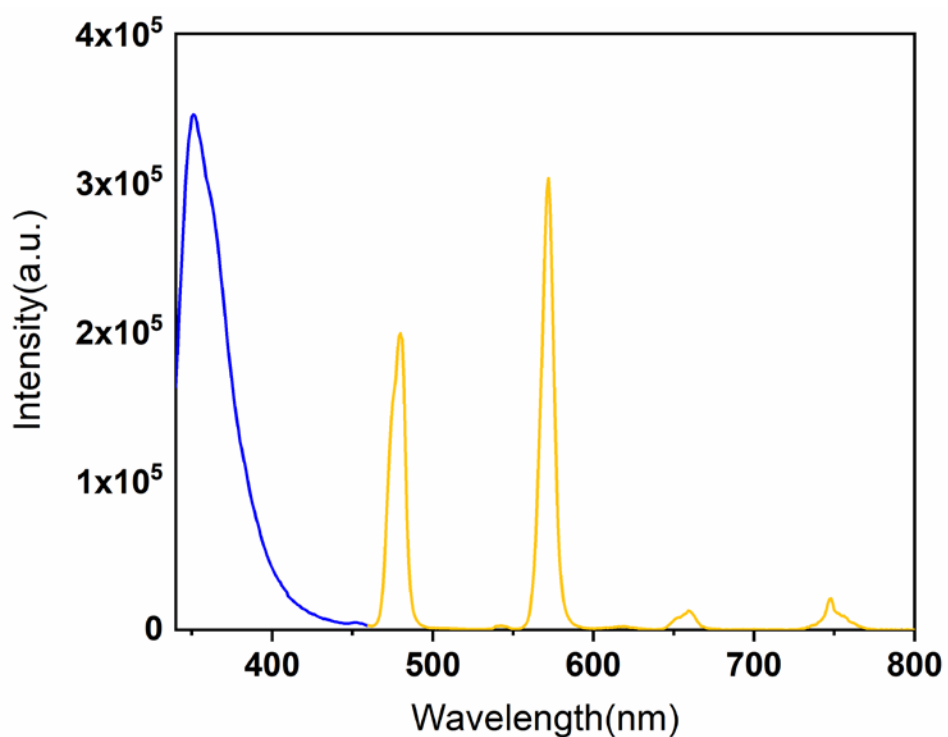

**Figure S72.** Emission spectra of  $\text{Dy}_8\text{L}_4$  ( $c = 1 \times 10^{-5}$  M,  $\text{CH}_3\text{CN}$ ,  $\lambda_{\text{ex}}=315\text{nm}$ ).



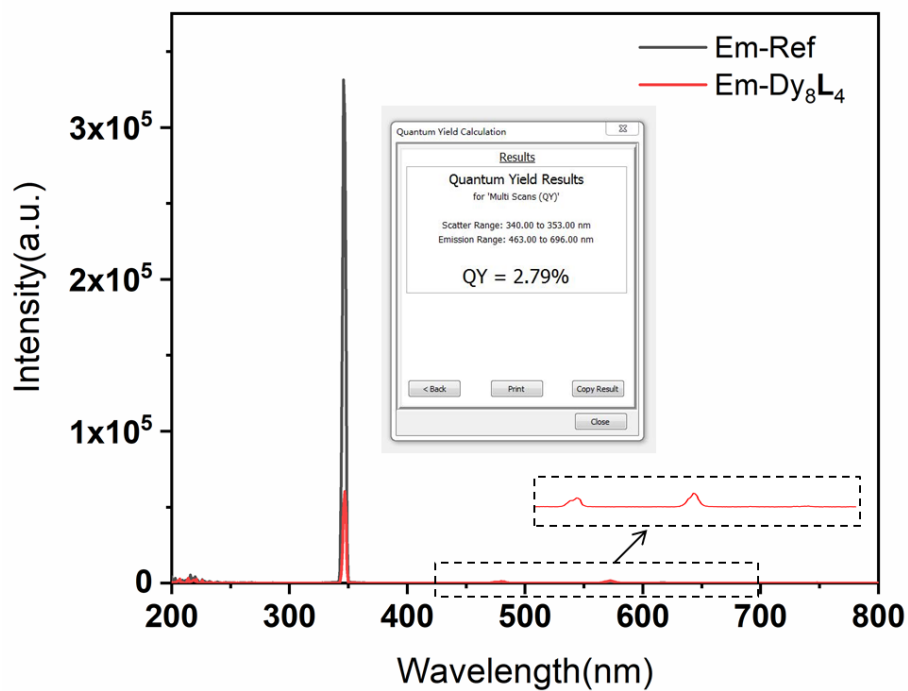

**Figure S73.** The superposition of emission spectra of reference and  $\text{Dy}_8\text{L}_4$  ( $\lambda_{\text{ex}} = 347$  nm,  $c = 1 \times 10^{-5}$  M in  $\text{CH}_3\text{CN}$ ,  $\Phi_{\text{overall}} = 2.79\%$ ).

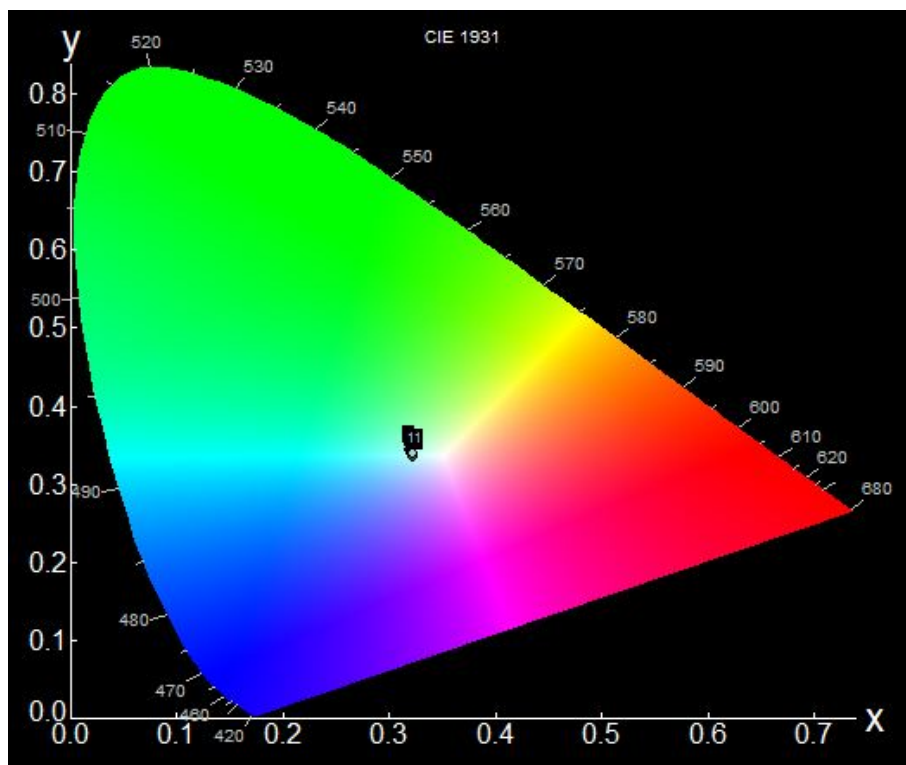

**Figure S74.** Shifts of the CIE of complex  $\text{Dy}_8\text{L}_4$  under varying excitation wavelengths from 290 nm to 300 nm showing the location of the color-tunable chromaticity of emission image.

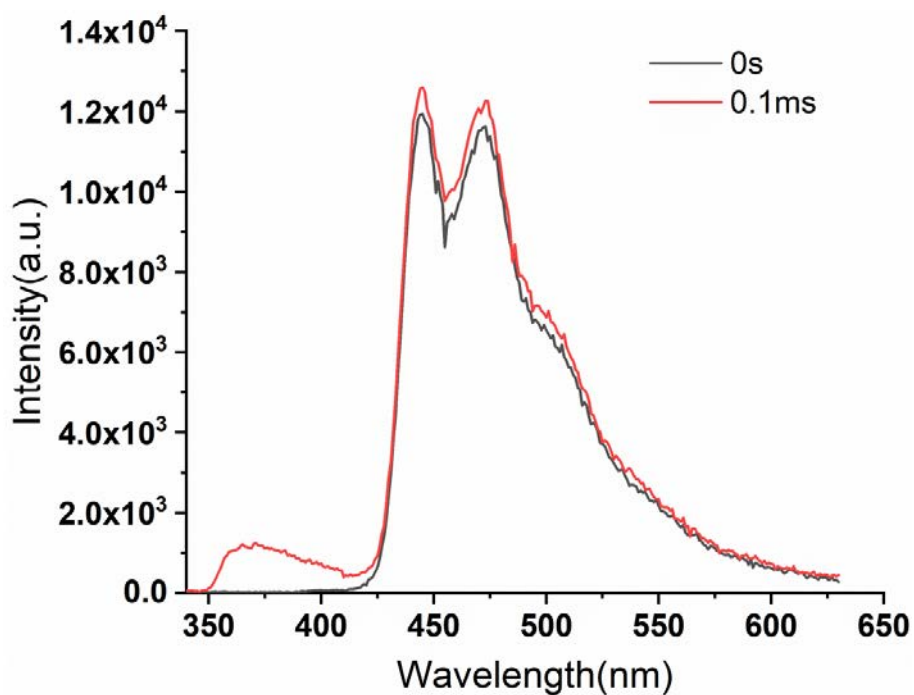

**Figure S75.** Phosphorescence spectra of Gd<sub>8</sub>L<sub>4</sub> at 77 K ( $c = 1 \times 10^{-5}$  M, CH<sub>3</sub>CN).

**Table S7.** Summary of fluorescence properties of ligand L assemblies

| LOPs                           | $\lambda_{\text{ex}}$ (nm) | $\lambda_{\text{em}}$ (nm) | $\Phi$ (%) |
|--------------------------------|----------------------------|----------------------------|------------|
| Tb <sub>8</sub> L <sub>4</sub> | 345nm                      | 543nm                      | 92.74%     |
| Sm <sub>8</sub> L <sub>4</sub> | 348nm                      | 595nm                      | 0.88%      |
| Dy <sub>8</sub> L <sub>4</sub> | 347nm                      | 572nm                      | 2.79%      |

**Table S8.** Summary of different modulation to WLE

| LOPs                           | $\lambda_{\text{ex}}$ (nm) | CIE         |
|--------------------------------|----------------------------|-------------|
| Dy <sub>8</sub> L <sub>4</sub> | 290                        | 0.319,0.344 |
|                                | 291                        | 0.321,0.343 |
|                                | 292                        | 0.320,0.341 |
|                                | 293                        | 0.321,0.339 |
|                                | 294                        | 0.322,0.340 |
|                                | 295                        | 0.323,0.339 |
|                                | 296                        | 0.323,0.337 |
|                                | 297                        | 0.323,0.336 |
|                                | 298                        | 0.322,0.334 |
|                                | 299                        | 0.322,0.335 |
|                                | 300                        | 0.322,0.339 |

## 7. Reference

1. F. Yin, J. Yang, L.-P. Zhou, X. Meng, C.-B. Tian and Q.-F. Sun, 54 K Spin Transition Temperature Shift in a Fe<sub>6</sub>L<sub>4</sub> Octahedral Cage Induced by Optimal Fitted Multiple Guests, *J. Am. Chem. Soc.* 2024, **146**, 7811-7821.
2. O. V. Dolomanov, L. J. Bourhis, R. J. Gildea, J. A. K. Howard and H. Puschmann, OLEX2: a complete structure solution, refinement and analysis program, *J. Appl. Cryst.* 2009, **42**, 339-341.
3. Spek, A. L. Single-Crystal Structure Validation with the Program PLATON, *J. Appl. Crystallogr.* 2003, **36**, 7.
4. J. B. Maglic and R. Lavendomme, MoloVol: an easy-to-use program for analyzing cavities, volumes and surface areas of chemical structures, *J. Appl. Crystallogr.*, 2022, **55**, 1033-1044.
